# Supplementary material for: Evaluation of improved coloured targets to control riverine tsetse in East Africa: A Bayesian approach
Source: PLoS Negl Trop Dis. 2021 Jun 21;15(6):e0009463. doi: 10.1371/journal.pntd.0009463 (PMC8216509; doi:10.1371/journal.pntd.0009463)
Supplement: S1 Dataset — (XLSX) [file pntd.0009463.s002.xlsx]

## Sheet: Contents
Expt1Kenya	Data for experiment 1, conducted in Kenya
Expt2Kenya	Data for experiment 2, conducted in Kenya
Expt3Uganda	Data for experiment 3, conducted in Uganda
Mean fabric spectra	Reflectance spectra for the fabrics tested, averaged over two reflectance probe azimuth angles and three replicate measurements for each angle.
SensitivityFunctions	Photoreceptor spectral sensitivity functions, from calculation tool provided in Supporting Information files of [1].
PhotoreceptorExcitations	Subsampled fabric reflectance spectra (as above) and calculated photoreceptor excitations, calculated using tool provided in Supporting Information files of [1].
LindhEtAl2012Data	Data originally published in [2], from the Supporting Information files of [1]
KenyaExcitations	Experiments 1 and 2 collated as a single file for a photoreceptor-based analysis; rep, day, and site all adjusted to run continuously across all cases.
UgandaExcitations	Experiment 3 as a single file for a photoreceptor-based analysis.
References
1. Santer RD. Developing photoreceptor-based models of visual attraction in riverine tsetse, for use in the engineering of more-attractive polyester fabrics for control devices. PLoS Negl Trop Dis. 2017;11(3):e0005448.
2. Lindh JM, Goswami P, Blackburn R, Arnold SEJ, Vale GA, Lehane MJ, et al. Optimizing the colour and fabric of targets for the control of the tsetse fly Glossina fuscipes fuscipes. PLoS Negl Trop Dis. 2012;6(5):e1661.

## Sheet: Expt1Kenya
date	rep	day	site	fabric	TypBlue	VestSP23	Violet	net_males	fabric_males	net_females	fabric_females	males	females	total
2018-09-04	1	1	1	TypBlue	1	0	0	19	6	32	5	25	37	62
2018-09-04	2	1	2	VestZF	0	0	0	10	3	17	3	13	20	33
2018-09-04	3	1	3	VestSP23	0	1	0	31	17	38	3	48	41	89
2018-09-04	4	1	4	Violet	0	0	1	5	4	24	1	9	25	34
2018-09-05	5	2	1	Violet	0	0	1	12	9	26	5	21	31	52
2018-09-05	6	2	2	VestSP23	0	1	0	14	0	19	2	14	21	35
2018-09-05	7	2	3	VestZF	0	0	0	27	8	46	5	35	51	86
2018-09-05	8	2	4	TypBlue	1	0	0	5	0	8	1	5	9	14
2018-09-06	9	3	1	VestZF	0	0	0	13	4	21	6	17	27	44
2018-09-06	10	3	2	Violet	0	0	1	10	0	17	2	10	19	29
2018-09-06	11	3	3	TypBlue	1	0	0	19	6	14	12	25	26	51
2018-09-06	12	3	4	VestSP23	0	1	0	3	2	8	4	5	12	17
2018-09-07	13	4	1	VestSP23	0	1	0	10	1	24	4	11	28	39
2018-09-07	14	4	2	TypBlue	1	0	0	2	2	12	2	4	14	18
2018-09-07	15	4	3	Violet	0	0	1	16	2	51	7	18	58	76
2018-09-07	16	4	4	VestZF	0	0	0	4	0	22	2	4	24	28
2018-09-10	17	5	1	Violet	0	0	1	9	4	16	3	13	19	32
2018-09-10	18	5	2	VestSP23	0	1	0	11	2	27	3	13	30	43
2018-09-10	19	5	3	TypBlue	1	0	0	17	0	19	3	17	22	39
2018-09-10	20	5	4	VestZF	0	0	0	12	0	23	1	12	24	36
2018-09-11	21	6	1	TypBlue	1	0	0	13	1	13	0	14	13	27
2018-09-11	22	6	2	VestZF	0	0	0	9	1	20	0	10	20	30
2018-09-11	23	6	3	Violet	0	0	1	19	1	22	3	20	25	45
2018-09-11	24	6	4	VestSP23	0	1	0	8	0	17	0	8	17	25
2018-09-12	25	7	1	VestZF	0	0	0	10	1	18	0	11	18	29
2018-09-12	26	7	2	Violet	0	0	1	10	0	24	2	10	26	36
2018-09-12	27	7	3	VestSP23	0	1	0	8	1	18	0	9	18	27
2018-09-12	28	7	4	TypBlue	1	0	0	2	1	3	2	3	5	8
2018-09-13	29	8	1	VestSP23	0	1	0	3	2	8	1	5	9	14
2018-09-13	30	8	2	TypBlue	1	0	0	2	0	8	1	2	9	11
2018-09-13	31	8	3	VestZF	0	0	0	14	2	12	1	16	13	29
2018-09-13	32	8	4	Violet	0	0	1	1	0	10	1	1	11	12
2018-09-17	33	9	1	VestSP23	0	1	0	7	9	20	0	16	20	36
2018-09-17	34	9	2	TypBlue	1	0	0	11	12	8	0	23	8	31
2018-09-17	35	9	3	VestZF	0	0	0	9	11	21	0	20	21	41
2018-09-17	36	9	4	Violet	0	0	1	1	1	13	0	2	13	15
2018-09-18	37	10	1	Violet	0	0	1	6	1	11	0	7	11	18
2018-09-18	38	10	2	VestSP23	0	1	0	13	0	20	0	13	20	33
2018-09-18	39	10	3	TypBlue	1	0	0	5	0	11	3	5	14	19
2018-09-18	40	10	4	VestZF	0	0	0	2	1	9	0	3	9	12
2018-09-19	41	11	1	VestZF	0	0	0	6	2	16	1	8	17	25
2018-09-19	42	11	2	Violet	0	0	1	4	3	12	1	7	13	20
2018-09-19	43	11	3	VestSP23	0	1	0	18	4	15	1	22	16	38
2018-09-19	44	11	4	TypBlue	1	0	0	3	0	5	1	3	6	9
2018-09-20	45	12	1	TypBlue	1	0	0	5	1	13	0	6	13	19
2018-09-20	46	12	2	VestZF	0	0	0	5	0	10	0	5	10	15
2018-09-20	47	12	3	Violet	0	0	1	6	2	7	0	8	7	15
2018-09-20	48	12	4	VestSP23	0	1	0	2	0	13	0	2	13	15
2018-10-01	49	13	1	VestZF	0	0	0	10	8	20	3	18	23	41
2018-10-01	50	13	2	VestSP23	0	1	0	7	0	8	0	7	8	15
2018-10-01	51	13	3	TypBlue	1	0	0	7	2	9	1	9	10	19
2018-10-01	52	13	4	Violet	0	0	1	4	1	11	0	5	11	16
2018-10-02	53	14	1	VestSP23	0	1	0	14	1	23	8	15	31	46
2018-10-02	54	14	2	VestZF	0	0	0	11	0	20	0	11	20	31
2018-10-02	55	14	3	Violet	0	0	1	14	3	26	1	17	27	44
2018-10-02	56	14	4	TypBlue	1	0	0	2	0	2	0	2	2	4
2018-10-03	57	15	1	TypBlue	1	0	0	10	1	19	0	11	19	30
2018-10-03	58	15	2	Violet	0	0	1	7	1	28	1	8	29	37
2018-10-03	59	15	3	VestSP23	0	1	0	10	5	9	0	15	9	24
2018-10-03	60	15	4	VestZF	0	0	0	5	0	7	0	5	7	12
2018-10-04	61	16	1	Violet	0	0	1	14	0	17	4	14	21	35
2018-10-04	62	16	2	TypBlue	1	0	0	3	0	9	0	3	9	12
2018-10-04	63	16	3	VestZF	0	0	0	17	0	22	1	17	23	40
2018-10-04	64	16	4	VestSP23	0	1	0	5	0	6	0	5	6	11

## Sheet: Expt2Kenya
date	rep	day	site	fabric	VioletLt	VioletMid	VioletDk	net_males	fabric_males	net_females	fabric_females	males	females	total
30/4/2019	1	1	1	Violet4.5%	1	0	0	7	0	15	3	7	18	25
30/4/2019	2	1	2	Violet7%	0	1	0	9	1	16	2	10	18	28
30/4/2019	3	1	3	VestZF	0	0	0	27	6	23	0	33	23	56
30/4/2019	4	1	4	Violet9%	0	0	1	3	0	13	3	3	16	19
2019-01-05	5	2	1	Violet7%	0	1	0	9	5	12	2	14	14	28
2019-01-05	6	2	2	Violet9%	0	0	1	8	3	16	1	11	17	28
2019-01-05	7	2	3	Violet4.5%	1	0	0	16	7	17	1	23	18	41
2019-01-05	8	2	4	VestZF	0	0	0	5	0	10	0	5	10	15
2019-02-05	9	3	1	Violet9%	0	0	1	6	2	7	2	8	9	17
2019-02-05	10	3	2	VestZF	0	0	0	7	0	18	0	7	18	25
2019-02-05	11	3	3	Violet7%	0	1	0	18	4	20	0	22	20	42
2019-02-05	12	3	4	Violet4.5%	1	0	0	2	0	6	0	2	6	8
2019-04-05	13	4	1	VestZF	0	0	0	9	3	6	0	12	6	18
2019-04-05	14	4	2	Violet4.5%	1	0	0	10	1	9	2	11	11	22
2019-04-05	15	4	3	Violet9%	0	0	1	20	6	15	0	26	15	41
2019-04-05	16	4	4	Violet7%	0	1	0	5	0	14	1	5	15	20
2019-06-05	17	5	1	Violet4.5%	1	0	0	5	0	13	0	5	13	18
2019-06-05	18	5	2	Violet7%	0	1	0	4	1	14	4	5	18	23
2019-06-05	19	5	3	Violet9%	0	0	1	16	4	10	2	20	12	32
2019-06-05	20	5	4	VestZF	0	0	0	0	0	7	0	0	7	7
2019-07-05	21	6	1	Violet9%	0	0	1	5	2	11	3	7	14	21
2019-07-05	22	6	2	VestZF	0	0	0	1	1	5	0	2	5	7
2019-07-05	23	6	3	Violet4.5%	1	0	0	14	3	15	2	17	17	34
2019-07-05	24	6	4	Violet7%	0	1	0	4	0	5	2	4	7	11
2019-08-05	25	7	1	VestZF	0	0	0	14	1	29	2	15	31	46
2019-08-05	26	7	2	Violet4.5%	1	0	0	8	0	12	2	8	14	22
2019-08-05	27	7	3	Violet7%	0	1	0	11	4	10	1	15	11	26
2019-08-05	28	7	4	Violet9%	0	0	1	0	2	4	0	2	4	6
2019-09-05	29	8	1	Violet7%	0	1	0	0	0	9	1	0	10	10
2019-09-05	30	8	2	Violet9%	0	0	1	4	0	7	0	4	7	11
2019-09-05	31	8	3	VestZF	0	0	0	13	0	9	0	13	9	22
2019-09-05	32	8	4	Violet4.5%	1	0	0	5	1	3	0	6	3	9
14/5/2019	33	9	5	Violet7%	0	1	0	17	2	14	1	19	15	34
14/5/2019	34	9	6	VestZF	0	0	0	3	3	2	0	6	2	8
14/5/2019	35	9	7	Violet4.5%	1	0	0	13	7	11	3	20	14	34
14/5/2019	36	9	8	Violet9%	0	0	1	18	5	14	1	23	15	38
15/5/2019	37	10	5	VestZF	0	0	0	17	3	17	1	20	18	38
15/5/2019	38	10	6	Violet7%	0	1	0	9	5	66	1	14	67	81
15/5/2019	39	10	7	Violet9%	0	0	1	10	0	11	12	10	23	33
15/5/2019	40	10	8	Violet4.5%	1	0	0	17	17	12	2	34	14	48
16/5/2019	41	11	5	Violet9%	0	0	1	13	1	16	1	14	17	31
16/5/2019	42	11	6	Violet4.5%	1	0	0	5	5	5	1	10	6	16
16/5/2019	43	11	7	Violet7%	0	1	0	7	0	7	1	7	8	15
16/5/2019	44	11	8	VestZF	0	0	0	10	0	14	2	10	16	26
17/5/2019	45	12	5	Violet4.5%	1	0	0	3	4	3	0	7	3	10
17/5/2019	46	12	6	Violet9%	0	0	1	4	2	14	0	6	14	20
17/5/2019	47	12	7	VestZF	0	0	0	3	0	9	1	3	10	13
17/5/2019	48	12	8	Violet7%	0	1	0	4	3	8	1	7	9	16
20/5/2019	49	13	5	VestZF	0	0	0	6	0	9	4	6	13	19
20/5/2019	50	13	6	Violet4.5%	1	0	0	8	4	8	0	12	8	20
20/5/2019	51	13	7	Violet9%	0	0	1	11	2	8	4	13	12	25
20/5/2019	52	13	8	Violet7%	0	1	0	19	2	19	4	21	23	44
21/5/2019	53	14	5	Violet4.5%	1	0	0	6	0	9	2	6	11	17
21/5/2019	54	14	6	Violet7%	0	1	0	4	4	8	1	8	9	17
21/5/2019	55	14	7	VestZF	0	0	0	2	0	9	0	2	9	11
21/5/2019	56	14	8	Violet9%	0	0	1	15	4	12	2	19	14	33
2019-05-22	57	15	5	Violet9%	0	0	1	5	0	15	3	5	18	23
2019-05-22	58	15	6	VestZF	0	0	0	3	0	4	2	3	6	9
2019-05-22	59	15	7	Violet7%	0	1	0	3	4	7	3	7	10	17
2019-05-22	60	15	8	Violet4.5%	1	0	0	7	4	9	0	11	9	20
2019-05-23	61	16	5	Violet7%	0	1	0	8	1	4	1	9	5	14
2019-05-23	62	16	6	Violet9%	0	0	1	4	3	3	1	7	4	11
2019-05-23	63	16	7	Violet4.5%	1	0	0	6	6	3	0	12	3	15
2019-05-23	64	16	8	VestZF	0	0	0	9	4	2	0	13	2	15

## Sheet: Expt3Uganda
date	rep	day	site	fabric	TypBlue	Violet	males	females	total
2017-08-23	1	1	1	TypBlue	1	0	1	6	7
2017-08-23	2	1	2	VestZF	0	0	0	1	1
2017-08-23	3	1	3	Violet	0	1	0	0	0
2017-08-24	4	2	1	Violet	0	1	0	0	0
2017-08-24	5	2	3	VestZF	0	0	0	0	0
2017-08-29	6	3	1	VestZF	0	0	1	1	2
2017-08-29	7	3	2	Violet	0	1	1	1	2
2017-08-29	8	3	3	TypBlue	1	0	0	0	0
2017-08-30	9	4	1	TypBlue	1	0	0	2	2
2017-08-30	10	4	2	Violet	0	1	0	0	0
2017-08-30	11	4	3	VestZF	0	0	1	3	4
2017-08-31	12	5	1	Violet	0	1	0	5	5
2017-08-31	13	5	2	VestZF	0	0	0	1	1
2017-08-31	14	5	3	TypBlue	1	0	0	0	0
2017-09-05	15	6	1	VestZF	0	0	1	0	1
2017-09-05	16	6	2	TypBlue	1	0	0	0	0
2017-09-05	17	6	3	Violet	0	1	1	0	1
2017-09-06	18	7	1	VestZF	0	0	2	5	7
2017-09-06	19	7	2	Violet	0	1	0	2	2
2017-09-06	20	7	3	TypBlue	1	0	2	2	4
2017-09-07	21	8	1	Violet	0	1	2	1	3
2017-09-07	22	8	2	TypBlue	1	0	0	0	0
2017-09-07	23	8	3	VestZF	0	0	0	2	2
2017-09-11	24	9	1	TypBlue	1	0	1	1	2
2017-09-11	25	9	2	VestZF	0	0	0	1	1
2017-09-11	26	9	3	Violet	0	1	2	1	3
2017-09-12	27	10	1	VestZF	0	0	0	2	2
2017-09-12	28	10	2	Violet	0	1	0	0	0
2017-09-12	29	10	3	TypBlue	1	0	0	1	1
2017-09-13	30	11	1	TypBlue	1	0	0	4	4
2017-09-13	31	11	2	VestZF	0	0	0	0	0
2017-09-13	32	11	3	Violet	0	1	1	1	2
2017-09-14	33	12	1	Violet	0	1	0	0	0
2017-09-14	34	12	2	TypBlue	1	0	0	0	0
2017-09-14	35	12	3	VestZF	0	0	0	0	0
2017-09-15	36	13	1	VestZF	0	0	3	4	7
2017-09-15	37	13	2	TypBlue	1	0	0	0	0
2017-09-15	38	13	3	Violet	0	1	0	3	3
2017-09-18	39	14	1	Violet	0	1	4	3	7
2017-09-18	40	14	2	VestZF	0	0	0	1	1
2017-09-18	41	14	3	TypBlue	1	0	0	0	0
2017-09-19	42	15	1	TypBlue	1	0	0	0	0
2017-09-19	43	15	2	Violet	0	1	1	2	3
2017-09-19	44	15	3	VestZF	0	0	0	1	1
2017-09-20	45	16	1	Violet	0	1	0	1	1
2017-09-20	46	16	2	TypBlue	1	0	1	1	2
2017-09-20	47	16	3	VestZF	0	0	0	1	1
2017-09-21	48	17	1	TypBlue	1	0	0	0	0
2017-09-21	49	17	2	VestZF	0	0	0	0	0
2017-09-21	50	17	3	Violet	0	1	0	0	0

## Sheet: MeanFabricSpectra
WL	Violet	TypBlue	VestZF	VestSP23	Violet9pc	Violet7pc	Violet4.5pc	AverageVest	AverageViolet
250.032	4.27333	4.80667	3.47167	5.15333	4.65667	4.42	4.68667	4.3125	4.50917
250.244	4.30833	4.81333	3.48167	5.16417	4.67667	4.43667	4.72	4.32292	4.53542
250.455	4.305	4.77667	3.46167	5.16417	4.64833	4.44833	4.71333	4.31292	4.52875
250.667	4.305	4.77833	3.475	5.1575	4.64833	4.45	4.70833	4.31625	4.52792
250.879	4.30833	4.78333	3.49167	5.16917	4.66833	4.45333	4.735	4.33042	4.54125
251.09	4.31167	4.78333	3.50167	5.1825	4.67667	4.47167	4.75	4.34208	4.5525
251.302	4.30667	4.79	3.495	5.17917	4.675	4.48667	4.75167	4.33708	4.555
251.513	4.32333	4.79167	3.49	5.19167	4.68667	4.48333	4.77167	4.34083	4.56625
251.725	4.32333	4.79667	3.48333	5.20417	4.70333	4.49667	4.785	4.34375	4.57708
251.937	4.335	4.81	3.48667	5.22417	4.72	4.505	4.79167	4.35542	4.58792
252.148	4.34333	4.83	3.50167	5.22833	4.73333	4.51	4.80333	4.365	4.5975
252.36	4.36	4.865	3.52667	5.2575	4.76	4.52333	4.825	4.39208	4.61708
252.571	4.41	4.88667	3.57667	5.3125	4.80667	4.58	4.855	4.44458	4.66292
252.783	4.41333	4.93667	3.585	5.315	4.84167	4.58333	4.87	4.45	4.67708
252.995	4.375	4.94333	3.54333	5.29	4.81833	4.535	4.865	4.41667	4.64833
253.206	4.375	4.97167	3.525	5.27583	4.79833	4.53333	4.84167	4.40042	4.63708
253.418	4.375	4.98	3.49333	5.2675	4.80167	4.48667	4.79333	4.38042	4.61417
253.629	4.42333	5.01667	3.51833	5.28833	4.85167	4.51	4.82333	4.40333	4.65208
253.841	4.44333	5.05667	3.55	5.3275	4.88333	4.545	4.78833	4.43875	4.665
254.052	4.54333	5.11667	3.59667	5.32583	4.905	4.55333	4.80833	4.46125	4.7025
254.264	4.52667	5.10833	3.58833	5.25	4.86667	4.51167	4.765	4.41917	4.6675
254.475	4.54667	5.15333	3.65333	5.28417	4.88333	4.54167	4.78667	4.46875	4.68958
254.687	4.58167	5.13	3.66	5.29	4.88667	4.57667	4.79333	4.475	4.70958
254.898	4.545	5.12833	3.60833	5.22	4.83	4.51667	4.77	4.41417	4.66542
255.11	4.595	5.165	3.65667	5.25333	4.875	4.54667	4.80833	4.455	4.70625
255.321	4.66667	5.20167	3.71333	5.33417	4.93333	4.61667	4.85167	4.52375	4.76708
255.533	4.635	5.14167	3.65333	5.26583	4.87333	4.56167	4.81167	4.45958	4.72042
255.744	4.685	5.16	3.69	5.325	4.91167	4.615	4.87333	4.5075	4.77125
255.956	4.75667	5.23	3.78167	5.41833	4.97667	4.69	4.95667	4.6	4.845
256.167	4.785	5.265	3.815	5.45333	5.005	4.71833	5	4.63417	4.87708
256.379	4.755	5.275	3.805	5.46583	5.015	4.725	5.00167	4.63542	4.87417
256.59	4.765	5.265	3.77833	5.47583	4.99167	4.735	5.02	4.62708	4.87792
256.801	4.805	5.28833	3.78667	5.485	5.03167	4.75833	5.07167	4.63583	4.91667
257.013	4.86667	5.35833	3.83333	5.50167	5.105	4.8	5.11667	4.6675	4.97208
257.224	4.84667	5.37667	3.87333	5.58917	5.13	4.83	5.115	4.73125	4.98042
257.436	4.85667	5.40667	3.88833	5.63	5.13333	4.87333	5.13333	4.75917	4.99917
257.647	4.875	5.44167	3.87	5.64417	5.15167	4.885	5.17833	4.75708	5.0225
257.858	4.965	5.53	3.97	5.74583	5.25667	4.95833	5.28167	4.85792	5.11542
258.07	5.04667	5.65	4.08333	5.7325	5.3	5.00833	5.34667	4.90792	5.17542
258.281	4.95833	5.58667	3.99	5.55917	5.2	4.85833	5.23667	4.77458	5.06333
258.492	4.91667	5.54	3.93667	5.46583	5.13	4.81833	5.18667	4.70125	5.01292
258.704	4.98167	5.585	3.985	5.465	5.15	4.85833	5.25	4.725	5.06
258.915	5.05333	5.68833	4.08	5.58833	5.26333	4.93333	5.32333	4.83417	5.14333
259.127	5.01833	5.65167	4.00667	5.5475	5.205	4.89167	5.24	4.77708	5.08875
259.338	4.89167	5.56167	3.91	5.52833	5.10167	4.78	5.16167	4.71917	4.98375
259.549	4.89333	5.52833	3.87333	5.465	5.06	4.755	5.10833	4.66917	4.95417
259.76	4.975	5.57167	3.96333	5.4825	5.12833	4.76333	5.15333	4.72292	5.005
259.972	5.03	5.60333	4.08	5.53083	5.20333	4.83833	5.18167	4.80542	5.06333
260.183	4.96333	5.59	4.06167	5.51833	5.19833	4.85667	5.17333	4.79	5.04792
260.394	4.85167	5.52167	3.92167	5.43333	5.125	4.75167	5.06	4.6775	4.94708
260.606	4.84833	5.505	3.94333	5.49167	5.12833	4.83333	5.09167	4.7175	4.97542
260.817	4.86833	5.515	3.95667	5.55167	5.13667	4.87333	5.105	4.75417	4.99583
261.028	4.78833	5.465	3.93333	5.54083	5.08833	4.84333	5.05667	4.73708	4.94417
261.239	4.84	5.47333	3.96	5.54917	5.12	4.87333	5.095	4.75458	4.98208
261.451	4.9	5.51	4.02667	5.64417	5.20833	4.95667	5.17833	4.83542	5.06083
261.662	4.97833	5.56	4.07833	5.68333	5.26833	5.05833	5.21833	4.88083	5.13083
261.873	4.99167	5.55333	4.07167	5.69	5.29	5.11667	5.31333	4.88083	5.17792
262.084	5.00333	5.53667	4.02833	5.72	5.295	5.13833	5.32	4.87417	5.18917
262.296	4.96167	5.49833	3.94667	5.67167	5.24833	5.09333	5.30833	4.80917	5.15292
262.507	5	5.48667	3.95167	5.67167	5.25333	5.10333	5.32667	4.81167	5.17083
262.718	5.02833	5.47833	3.96833	5.71167	5.27333	5.13333	5.37	4.84	5.20125
262.929	5.04333	5.485	3.96167	5.71417	5.28333	5.125	5.38333	4.83792	5.20875
263.14	5.025	5.465	3.94333	5.69	5.28	5.11	5.36667	4.81667	5.19542
263.351	5.05	5.47833	3.95667	5.70333	5.29833	5.12833	5.38333	4.83	5.215
263.563	5.03333	5.47667	3.94667	5.69583	5.29333	5.125	5.38667	4.82125	5.20958
263.774	5.02333	5.47167	3.925	5.68	5.27333	5.10667	5.375	4.8025	5.19458
263.985	4.99833	5.465	3.90333	5.66417	5.265	5.09	5.37333	4.78375	5.18167
264.196	5.01333	5.47	3.91333	5.65583	5.28	5.08	5.35833	4.78458	5.18292
264.407	4.99167	5.46667	3.91167	5.63167	5.26667	5.065	5.34667	4.77167	5.1675
264.618	4.99333	5.46333	3.93	5.62583	5.26667	5.07167	5.34	4.77792	5.16792
264.829	4.98	5.46833	3.93833	5.64	5.275	5.075	5.33667	4.78917	5.16667
265.04	4.97333	5.47833	3.95167	5.64083	5.28667	5.08833	5.34333	4.79625	5.17292
265.252	4.97667	5.50333	3.98	5.63833	5.28833	5.11167	5.33333	4.80917	5.1775
265.463	4.97833	5.485	4.00333	5.63667	5.28167	5.10833	5.34333	4.82	5.17792
265.674	4.975	5.5	4.02167	5.61167	5.28333	5.12167	5.36167	4.81667	5.18542
265.885	4.95833	5.465	3.98	5.5675	5.23167	5.095	5.32	4.77375	5.15125
266.096	4.98333	5.49333	4.00833	5.55917	5.255	5.135	5.345	4.78375	5.17958
266.307	5.02667	5.49	4.07333	5.58083	5.26	5.15	5.38	4.82708	5.20417
266.518	5.04	5.50333	4.07	5.585	5.25	5.16	5.39333	4.8275	5.21083
266.729	5.02	5.43333	4.005	5.505	5.2	5.12	5.325	4.755	5.16625
266.94	5.03833	5.435	4.00833	5.4925	5.21167	5.11833	5.315	4.75042	5.17083
267.151	5.00167	5.39833	3.95833	5.42333	5.20167	5.065	5.27667	4.69083	5.13625
267.362	4.97167	5.39667	3.95833	5.3675	5.16667	5.05167	5.23	4.66292	5.105
267.573	4.96833	5.37	3.94167	5.3475	5.16333	4.99	5.20833	4.64458	5.0825
267.784	4.96167	5.39667	3.94167	5.33	5.18	4.99333	5.19833	4.63583	5.08333
267.995	4.9	5.31333	3.895	5.23	5.115	4.91	5.11	4.5625	5.00875
268.206	4.85667	5.29333	3.9	5.19167	5.11333	4.86833	5.09333	4.54583	4.98292
268.417	4.80333	5.19167	3.86333	5.11667	5.04333	4.795	5.01167	4.49	4.91333
268.628	4.78333	5.18833	3.795	5.06333	4.99167	4.775	4.965	4.42917	4.87875
268.839	4.795	5.21833	3.84667	5.135	5.005	4.79667	5.02167	4.49083	4.90458
269.05	4.79833	5.235	3.92	5.19	5.03	4.83	5.08333	4.555	4.93542
269.261	4.79	5.23167	3.90167	5.20333	5.03333	4.83167	5.09	4.5525	4.93625
269.472	4.825	5.25	3.90833	5.21417	5.04	4.84833	5.13333	4.56125	4.96167
269.683	4.825	5.20833	3.89667	5.19583	5.02	4.82833	5.12667	4.54625	4.95
269.893	4.80333	5.205	3.88333	5.16583	5.005	4.84333	5.14667	4.52458	4.94958
270.104	4.805	5.21833	3.91667	5.1575	4.99833	4.87667	5.14667	4.53708	4.95667
270.315	4.78667	5.18667	3.88667	5.15333	4.99667	4.86	5.13167	4.52	4.94375
270.526	4.82333	5.20167	3.92833	5.22	5.02333	4.89667	5.15333	4.57417	4.97417
270.737	4.81167	5.21167	3.92333	5.21667	5.01	4.89	5.14333	4.57	4.96375
270.948	4.81833	5.18667	3.95167	5.2325	5.015	4.88667	5.14167	4.59208	4.96542
271.159	4.76667	5.12667	3.89667	5.13917	4.99	4.82667	5.06333	4.51792	4.91167
271.37	4.72833	5.10667	3.83333	5.0875	4.95833	4.78167	5.02167	4.46042	4.8725
271.58	4.705	5.09167	3.82167	5.05667	4.925	4.76333	4.99	4.43917	4.84583
271.791	4.665	5.02833	3.795	5.05083	4.895	4.73167	4.94667	4.42292	4.80958
272.002	4.67167	5.035	3.795	5.04333	4.915	4.75833	4.93667	4.41917	4.82042
272.213	4.62167	5	3.765	5.03	4.90667	4.73667	4.885	4.3975	4.7875
272.424	4.59167	4.94333	3.72	4.99917	4.87	4.67	4.85	4.35958	4.74542
272.635	4.60333	4.96667	3.74	5.01583	4.87833	4.68	4.84	4.37792	4.75042
272.845	4.57667	4.94333	3.71833	4.96917	4.86167	4.66333	4.82	4.34375	4.73042
273.056	4.53667	4.93	3.7	4.935	4.845	4.65167	4.805	4.3175	4.70958
273.267	4.50333	4.935	3.68667	4.905	4.85167	4.655	4.805	4.29583	4.70375
273.478	4.46167	4.925	3.655	4.90333	4.77667	4.62	4.77167	4.27917	4.6575
273.688	4.48667	4.95333	3.70333	4.90167	4.78667	4.63	4.795	4.3025	4.67458
273.899	4.475	4.94833	3.70833	4.88833	4.77833	4.60833	4.77667	4.29833	4.65958
274.11	4.49333	4.97833	3.74667	4.89	4.79833	4.61667	4.78833	4.31833	4.67417
274.321	4.45	4.95333	3.71333	4.85917	4.74667	4.57333	4.75333	4.28625	4.63083
274.531	4.44333	4.92333	3.69333	4.81167	4.69833	4.52667	4.73	4.2525	4.59958
274.742	4.42	4.90833	3.66167	4.78417	4.685	4.50333	4.71333	4.22292	4.58042
274.953	4.42	4.90167	3.65167	4.7775	4.66	4.48667	4.69333	4.21458	4.565
275.163	4.405	4.855	3.615	4.72917	4.61667	4.445	4.65833	4.17208	4.53125
275.374	4.395	4.80833	3.60667	4.73	4.60833	4.42167	4.645	4.16833	4.5175
275.585	4.33833	4.73667	3.55333	4.67	4.53167	4.34667	4.57167	4.11167	4.44708
275.795	4.35333	4.745	3.56667	4.665	4.55333	4.37	4.59667	4.11583	4.46833
276.006	4.31167	4.69833	3.51167	4.63083	4.51667	4.33167	4.545	4.07125	4.42625
276.217	4.28833	4.67167	3.49	4.6	4.49	4.305	4.51833	4.045	4.40042
276.427	4.305	4.68833	3.49	4.59917	4.47833	4.32	4.51167	4.04458	4.40375
276.638	4.30333	4.67	3.50333	4.57167	4.46	4.305	4.49	4.0375	4.38958
276.849	4.28	4.65	3.49333	4.57083	4.455	4.315	4.46833	4.03208	4.37958
277.059	4.29833	4.66167	3.50667	4.59833	4.45833	4.33833	4.46667	4.0525	4.39042
277.27	4.27833	4.64167	3.49	4.5725	4.42333	4.305	4.46167	4.03125	4.36708
277.481	4.26167	4.645	3.49833	4.57833	4.43333	4.30333	4.45	4.03833	4.36208
277.691	4.24667	4.66	3.48667	4.54	4.40667	4.28833	4.425	4.01333	4.34167
277.902	4.25667	4.675	3.51167	4.56	4.43333	4.28333	4.44667	4.03583	4.355
278.112	4.23167	4.66167	3.54	4.5325	4.415	4.255	4.43167	4.03625	4.33333
278.323	4.26833	4.67667	3.585	4.57833	4.43833	4.29833	4.44667	4.08167	4.36292
278.533	4.27167	4.665	3.61333	4.56833	4.42833	4.27833	4.45167	4.09083	4.3575
278.744	4.21833	4.605	3.60333	4.54833	4.395	4.24333	4.41833	4.07583	4.31875
278.955	4.24	4.62167	3.60333	4.58083	4.40833	4.24	4.44167	4.09208	4.3325
279.165	4.26	4.61167	3.62	4.58667	4.40333	4.22833	4.47167	4.10333	4.34083
279.376	4.25167	4.60667	3.62167	4.57167	4.405	4.2	4.45833	4.09667	4.32875
279.586	4.265	4.62333	3.64167	4.57167	4.445	4.24167	4.47333	4.10667	4.35625
279.797	4.195	4.56333	3.57833	4.50917	4.355	4.16833	4.4	4.04375	4.27958
280.007	4.22333	4.59	3.60833	4.53417	4.38	4.18833	4.42167	4.07125	4.30333
280.218	4.22333	4.595	3.58	4.51667	4.36833	4.21167	4.405	4.04833	4.30208
280.428	4.23833	4.59667	3.58	4.54667	4.405	4.235	4.415	4.06333	4.32333
280.639	4.22333	4.595	3.56333	4.52	4.40667	4.20667	4.42167	4.04167	4.31458
280.849	4.24333	4.61	3.56833	4.51583	4.42167	4.24667	4.40833	4.04208	4.33
281.06	4.24667	4.625	3.54833	4.4875	4.4	4.23667	4.39833	4.01792	4.32042
281.27	4.23	4.59667	3.525	4.48	4.40667	4.24333	4.395	4.0025	4.31875
281.48	4.16333	4.57	3.48	4.43917	4.38667	4.205	4.34	3.95958	4.27375
281.691	4.165	4.585	3.50167	4.45167	4.39167	4.22167	4.37333	3.97667	4.28792
281.901	4.09167	4.52833	3.44833	4.41417	4.33833	4.17167	4.30333	3.93125	4.22625
282.112	4.13833	4.595	3.49	4.4425	4.41333	4.24667	4.335	3.96625	4.28333
282.322	4.11	4.57167	3.48	4.41583	4.38833	4.23167	4.315	3.94792	4.26125
282.533	4.125	4.57	3.49	4.4225	4.39167	4.23667	4.31667	3.95625	4.2675
282.743	4.11833	4.54833	3.46333	4.3675	4.34833	4.195	4.315	3.91542	4.24417
282.953	4.09	4.53167	3.44	4.32667	4.29167	4.17167	4.255	3.88333	4.20208
283.164	4.06	4.49667	3.42167	4.35167	4.27167	4.14333	4.24667	3.88667	4.18042
283.374	4.01333	4.46667	3.39333	4.3175	4.25833	4.105	4.215	3.85542	4.14792
283.584	3.95167	4.39667	3.36333	4.2475	4.2	4.03667	4.145	3.80542	4.08333
283.795	3.955	4.40333	3.36667	4.22833	4.17667	4.01833	4.14	3.7975	4.0725
284.005	3.89333	4.31333	3.295	4.14667	4.105	3.95667	4.06333	3.72083	4.00458
284.215	3.865	4.26833	3.25667	4.09667	4.06167	3.915	4.03	3.67667	3.96792
284.426	3.85167	4.22	3.25833	4.08	4.02	3.89167	4.03167	3.66917	3.94875
284.636	3.86333	4.19833	3.25333	4.08083	4.02333	3.885	4.025	3.66708	3.94917
284.846	3.87667	4.19167	3.275	4.08167	4.03	3.875	4.045	3.67833	3.95667
285.057	3.85833	4.17667	3.26	4.085	4.01	3.87667	4.00167	3.6725	3.93667
285.267	3.84	4.13667	3.235	4.0625	4.00167	3.84833	4.00167	3.64875	3.92292
285.477	3.82667	4.13333	3.22833	4.01917	3.98833	3.83167	4	3.62375	3.91167
285.687	3.87167	4.15667	3.26	4.0575	4.015	3.86167	4.04167	3.65875	3.9475
285.898	3.87667	4.16667	3.26333	4.0625	4.01833	3.88333	4.06167	3.66292	3.96
286.108	3.87167	4.145	3.26167	4.065	4.01667	3.895	4.05	3.66333	3.95833
286.318	3.89333	4.18333	3.29667	4.0875	4.065	3.92333	4.07167	3.69208	3.98833
286.528	3.89667	4.205	3.31667	4.1075	4.06833	3.95	4.095	3.71208	4.0025
286.739	3.86833	4.19	3.28667	4.07917	4.05833	3.91333	4.06167	3.68292	3.97542
286.949	3.81833	4.15167	3.24833	4.0375	4.01167	3.88167	4.03833	3.64292	3.9375
287.159	3.81667	4.15667	3.255	4.0475	4.03167	3.90167	4.03	3.65125	3.945
287.369	3.795	4.135	3.24	4.02417	4.01667	3.885	4.025	3.63208	3.93042
287.58	3.815	4.15833	3.26667	4.065	4.04667	3.93167	4.05167	3.66583	3.96125
287.79	3.805	4.14667	3.26	4.08	4.05333	3.94667	4.04833	3.67	3.96333
288	3.755	4.075	3.21167	4.00333	4.01167	3.88333	3.985	3.6075	3.90875
288.21	3.72167	4.05667	3.17833	3.97333	3.96333	3.84167	3.93833	3.57583	3.86625
288.42	3.71	4.045	3.17833	3.94333	3.945	3.82333	3.93333	3.56083	3.85292
288.63	3.66	3.98833	3.125	3.91417	3.88	3.785	3.89	3.51958	3.80375
288.841	3.67	3.985	3.12833	3.91167	3.89667	3.79	3.89	3.52	3.81167
289.051	3.67167	3.985	3.13667	3.89417	3.875	3.77833	3.89167	3.51542	3.80417
289.261	3.70667	4.01333	3.16833	3.92333	3.905	3.805	3.92	3.54583	3.83417
289.471	3.69333	4.00333	3.16667	3.91417	3.89333	3.80667	3.915	3.54042	3.82708
289.681	3.695	4.00333	3.17167	3.915	3.90167	3.82	3.905	3.54333	3.83042
289.891	3.68333	4.00333	3.16	3.89833	3.88167	3.78	3.90667	3.52917	3.81292
290.101	3.67	3.99	3.155	3.88417	3.85167	3.76167	3.86833	3.51958	3.78792
290.311	3.68	4.00833	3.18333	3.9025	3.865	3.795	3.89	3.54292	3.8075
290.521	3.66667	3.99333	3.185	3.9	3.86	3.81	3.90667	3.5425	3.81083
290.731	3.69333	4.02167	3.20167	3.95	3.885	3.835	3.92	3.57583	3.83333
290.941	3.71833	4.06167	3.24667	3.96917	3.91333	3.855	3.965	3.60792	3.86292
291.152	3.70167	4.06167	3.245	3.9575	3.90667	3.835	3.965	3.60125	3.85208
291.362	3.715	4.06667	3.25	3.99	3.92667	3.855	3.97333	3.62	3.8675
291.572	3.69	4.06333	3.23667	4.00333	3.92667	3.84667	3.95	3.62	3.85333
291.782	3.66833	4.035	3.205	3.98333	3.87833	3.81	3.92667	3.59417	3.82083
291.992	3.62833	4.00833	3.18333	3.95583	3.85667	3.77833	3.91167	3.56958	3.79375
292.202	3.61833	3.99333	3.18667	3.9425	3.845	3.775	3.89667	3.56458	3.78375
292.412	3.63667	4.00667	3.19833	3.9275	3.885	3.78833	3.92833	3.56292	3.80958
292.622	3.59667	4	3.15833	3.9275	3.84333	3.77167	3.90667	3.54292	3.77958
292.832	3.6	4.02667	3.17167	3.92583	3.86667	3.76667	3.92	3.54875	3.78833
293.042	3.56833	4.00667	3.13667	3.88417	3.84833	3.73333	3.87667	3.51042	3.75667
293.251	3.57667	4.01833	3.13333	3.88833	3.855	3.72667	3.87167	3.51083	3.7575
293.461	3.605	4.02333	3.155	3.90083	3.87333	3.745	3.87167	3.52792	3.77375
293.671	3.58833	4.03333	3.17167	3.8975	3.88167	3.72833	3.87667	3.53458	3.76875
293.881	3.57333	4.00833	3.17	3.875	3.865	3.72667	3.87333	3.5225	3.75958
294.091	3.55167	4.01333	3.155	3.8525	3.845	3.72333	3.85167	3.50375	3.74292
294.301	3.58167	4.015	3.16333	3.8775	3.84333	3.71333	3.84667	3.52042	3.74625
294.511	3.60167	4.03667	3.17833	3.91333	3.85833	3.72833	3.85	3.54583	3.75958
294.721	3.58	4.03167	3.16167	3.89583	3.81667	3.685	3.81833	3.52875	3.725
294.931	3.625	4.06333	3.22167	3.91083	3.85	3.69667	3.84167	3.56625	3.75333
295.141	3.64167	4.05833	3.22333	3.925	3.84167	3.70333	3.81833	3.57417	3.75125
295.351	3.67167	4.07333	3.25	3.94083	3.85167	3.74	3.86	3.59542	3.78083
295.56	3.66167	4.06	3.24167	3.94167	3.84	3.71833	3.835	3.59167	3.76375
295.77	3.65833	4.06	3.235	3.94667	3.83833	3.72667	3.84667	3.59083	3.7675
295.98	3.655	4.03667	3.19	3.92583	3.81167	3.71833	3.82167	3.55792	3.75167
296.19	3.65667	4.04833	3.19167	3.91583	3.79667	3.7	3.8	3.55375	3.73833
296.4	3.68833	4.07833	3.23167	3.94667	3.85	3.74333	3.84	3.58917	3.78042
296.61	3.71833	4.115	3.24167	3.94167	3.86833	3.77167	3.88833	3.59167	3.81167
296.819	3.68167	4.05833	3.22	3.90667	3.82833	3.75167	3.85333	3.56333	3.77875
297.029	3.69667	4.04833	3.25667	3.93917	3.85833	3.79333	3.88833	3.59792	3.80917
297.239	3.69833	4.04167	3.235	3.92333	3.835	3.79667	3.87833	3.57917	3.80208
297.449	3.69667	4.04833	3.25333	3.93	3.85667	3.78667	3.88833	3.59167	3.80708
297.659	3.66	4.00333	3.205	3.88	3.805	3.71667	3.845	3.5425	3.75667
297.868	3.66333	3.995	3.20833	3.86417	3.78333	3.71667	3.83167	3.53625	3.74875
298.078	3.65	3.99	3.19833	3.84333	3.76333	3.70667	3.82833	3.52083	3.73708
298.288	3.66	4.015	3.225	3.86917	3.785	3.735	3.85333	3.54708	3.75833
298.498	3.665	4.01	3.23	3.8675	3.80333	3.74333	3.87	3.54875	3.77042
298.707	3.63167	3.97	3.20333	3.8475	3.77167	3.69333	3.84	3.52542	3.73417
298.917	3.60167	3.94	3.19833	3.83167	3.74667	3.67667	3.80667	3.515	3.70792
299.127	3.625	3.96667	3.21833	3.84583	3.785	3.71333	3.85	3.53208	3.74333
299.336	3.61	3.94833	3.195	3.82083	3.765	3.7	3.83	3.50792	3.72625
299.546	3.58167	3.92	3.17167	3.8025	3.74333	3.68667	3.805	3.48708	3.70417
299.756	3.55667	3.88	3.13833	3.77333	3.71	3.66833	3.77333	3.45583	3.67708
299.966	3.59333	3.91333	3.19667	3.8325	3.75167	3.73	3.80667	3.51458	3.72042
300.175	3.595	3.92	3.205	3.84	3.76	3.73167	3.82667	3.5225	3.72833
300.385	3.60667	3.92167	3.22	3.86833	3.75667	3.74833	3.83167	3.54417	3.73583
300.595	3.57667	3.885	3.195	3.83667	3.72	3.725	3.79	3.51583	3.70292
300.804	3.58167	3.88333	3.18833	3.82667	3.70833	3.725	3.78667	3.5075	3.70042
301.014	3.58833	3.89167	3.195	3.8325	3.71333	3.725	3.795	3.51375	3.70542
301.223	3.60333	3.91	3.21667	3.85417	3.72167	3.75333	3.81333	3.53542	3.72292
301.433	3.57	3.87333	3.18333	3.82917	3.68	3.71167	3.76167	3.50625	3.68083
301.643	3.59	3.90333	3.20833	3.85	3.695	3.71833	3.77833	3.52917	3.69542
301.852	3.625	3.92167	3.23167	3.89417	3.73	3.73167	3.80667	3.56292	3.72333
302.062	3.64833	3.95333	3.25667	3.925	3.75167	3.75	3.83667	3.59083	3.74667
302.271	3.62833	3.93833	3.23333	3.89	3.73167	3.70833	3.81167	3.56167	3.72
302.481	3.62667	3.94	3.22833	3.895	3.73167	3.71167	3.815	3.56167	3.72125
302.691	3.61	3.905	3.19667	3.85333	3.73	3.675	3.78667	3.525	3.70042
302.9	3.64	3.93167	3.22167	3.86583	3.77167	3.66667	3.825	3.54375	3.72583
303.11	3.63167	3.91833	3.21333	3.87667	3.77167	3.64333	3.815	3.545	3.71542
303.319	3.64167	3.92333	3.21167	3.8525	3.77	3.65833	3.81333	3.53208	3.72083
303.529	3.61167	3.88333	3.17333	3.83417	3.755	3.61333	3.785	3.50375	3.69125
303.738	3.64833	3.93	3.205	3.86	3.77833	3.63	3.805	3.5325	3.71542
303.948	3.65667	3.93667	3.22667	3.8675	3.79333	3.65333	3.825	3.54708	3.73208
304.157	3.64	3.93167	3.21833	3.84333	3.77	3.65167	3.83	3.53083	3.72292
304.367	3.67667	3.975	3.22333	3.86167	3.77833	3.67667	3.84833	3.5425	3.745
304.576	3.68833	4	3.23167	3.87917	3.78667	3.68667	3.855	3.55542	3.75417
304.786	3.72167	4.04833	3.28333	3.93167	3.85	3.74167	3.915	3.6075	3.80708
304.995	3.77167	4.105	3.33667	3.9625	3.875	3.77	3.95167	3.64958	3.84208
305.205	3.80167	4.15333	3.375	4.005	3.90667	3.82833	3.99	3.69	3.88167
305.414	3.79167	4.14333	3.36833	3.99583	3.91167	3.835	3.98	3.68208	3.87958
305.624	3.82167	4.17333	3.39833	4.03167	3.94	3.85667	4.00333	3.715	3.90542
305.833	3.80833	4.19	3.395	4.00083	3.94833	3.85	3.99167	3.69792	3.89958
306.042	3.80333	4.215	3.405	4.02667	3.96833	3.87	4.02333	3.71583	3.91625
306.252	3.83667	4.26333	3.41167	4.04917	3.97833	3.88167	4.03167	3.73042	3.93208
306.461	3.85167	4.28167	3.43833	4.08083	4.00167	3.89833	4.04833	3.75958	3.95
306.671	3.87167	4.30333	3.485	4.12417	4.04667	3.93	4.07	3.80458	3.97958
306.88	3.82667	4.26833	3.45667	4.0825	4.02167	3.9	4.035	3.76958	3.94583
307.089	3.81833	4.26167	3.415	4.05167	4.00167	3.88167	3.97	3.73333	3.91792
307.299	3.81667	4.28167	3.41667	4.07917	4.02	3.905	3.97667	3.74792	3.92958
307.508	3.78667	4.24667	3.39167	4.04667	3.99	3.88667	3.94	3.71917	3.90083
307.717	3.83833	4.285	3.42	4.09167	4.02	3.92833	3.98333	3.75583	3.9425
307.927	3.83333	4.315	3.43667	4.11167	4.035	3.93	3.98333	3.77417	3.94542
308.136	3.86167	4.34	3.47333	4.14917	4.06667	3.95667	4.02833	3.81125	3.97833
308.345	3.78833	4.28833	3.435	4.0675	3.98667	3.88333	3.94333	3.75125	3.90042
308.555	3.72	4.24667	3.38833	4.03833	3.96333	3.83833	3.90333	3.71333	3.85625
308.764	3.72667	4.26	3.39333	4.0275	3.96	3.84	3.91167	3.71042	3.85958
308.973	3.75	4.25833	3.40333	4.03583	3.96833	3.86	3.93333	3.71958	3.87792
309.183	3.80667	4.315	3.455	4.08917	4	3.9	3.98167	3.77208	3.92208
309.392	3.81167	4.3	3.46167	4.105	3.985	3.9	4.02	3.78333	3.92917
309.601	3.77167	4.245	3.39833	4.0325	3.92667	3.84833	3.97	3.71542	3.87917
309.81	3.79167	4.27333	3.41833	4.07	3.925	3.855	3.96833	3.74417	3.885
310.02	3.755	4.26167	3.40167	4.04583	3.89333	3.82333	3.94667	3.72375	3.85458
310.229	3.72333	4.20667	3.37333	4.00667	3.83833	3.78667	3.91	3.69	3.81458
310.438	3.70833	4.20667	3.34833	3.98917	3.81167	3.78167	3.89333	3.66875	3.79875
310.647	3.78	4.26833	3.385	4.05667	3.89333	3.84333	3.95667	3.72083	3.86833
310.857	3.81333	4.315	3.405	4.07833	3.9	3.87	4	3.74167	3.89583
311.066	3.82	4.32667	3.37833	4.06083	3.90333	3.855	3.97333	3.71958	3.88792
311.275	3.78	4.33667	3.35833	4.0175	3.86667	3.79667	3.95667	3.68792	3.85
311.484	3.74	4.32	3.31	3.96417	3.82667	3.765	3.91667	3.63708	3.81208
311.693	3.73	4.35333	3.315	3.94833	3.83167	3.77167	3.91	3.63167	3.81083
311.903	3.75667	4.43833	3.35667	3.99917	3.86833	3.81167	3.965	3.67792	3.85042
312.112	3.775	4.50833	3.37167	4.00167	3.895	3.815	4.01833	3.68667	3.87583
312.321	3.74	4.53667	3.34333	3.96917	3.865	3.8	3.99167	3.65625	3.84917
312.53	3.75	4.60667	3.33167	3.97333	3.86667	3.80667	4.00167	3.6525	3.85625
312.739	3.76167	4.68167	3.33667	3.97333	3.87833	3.805	4.00833	3.655	3.86333
312.948	3.805	4.77833	3.37167	3.99	3.9	3.83833	4.045	3.68083	3.89708
313.157	3.76167	4.79833	3.32	3.94083	3.86333	3.80167	4.00667	3.63042	3.85833
313.366	3.75333	4.88833	3.31667	3.93417	3.86	3.8	4.01667	3.62542	3.8575
313.576	3.78	5.01	3.345	3.97667	3.89	3.85833	4.06667	3.66083	3.89875
313.785	3.81667	5.155	3.385	4.01	3.93667	3.89833	4.12667	3.6975	3.94458
313.994	3.85667	5.28833	3.41167	4.03917	3.95667	3.93	4.17333	3.72542	3.97917
314.203	3.84333	5.37833	3.4	4.0175	3.94	3.90667	4.16167	3.70875	3.96292
314.412	3.865	5.51333	3.41333	4.04417	3.965	3.94	4.2	3.72875	3.9925
314.621	3.895	5.63833	3.435	4.06333	4.005	3.975	4.245	3.74917	4.03
314.83	3.94167	5.81333	3.485	4.1025	4.06	4.03167	4.32167	3.79375	4.08875
315.039	3.94167	5.92833	3.48167	4.10083	4.055	4.035	4.335	3.79125	4.09167
315.248	3.90667	6.03833	3.44833	4.07417	4.035	4.02167	4.35167	3.76125	4.07875
315.457	3.99833	6.255	3.51167	4.135	4.11	4.09333	4.44	3.82333	4.16042
315.666	4.04	6.43333	3.555	4.17417	4.155	4.145	4.50667	3.86458	4.21167
315.875	4.03833	6.58167	3.525	4.1475	4.15833	4.13	4.515	3.83625	4.21042
316.084	4.065	6.77333	3.54	4.16	4.17667	4.16	4.545	3.85	4.23667
316.293	4.045	6.94667	3.53167	4.16083	4.19167	4.15667	4.54333	3.84625	4.23417
316.502	4.10667	7.17833	3.57167	4.19583	4.24667	4.205	4.62667	3.88375	4.29625
316.711	4.07833	7.30667	3.52333	4.1425	4.215	4.16667	4.60667	3.83292	4.26667
316.92	4.12833	7.51333	3.55167	4.18583	4.25667	4.19667	4.66333	3.86875	4.31125
317.129	4.13	7.65833	3.55333	4.19417	4.265	4.19833	4.68333	3.87375	4.31917
317.338	4.16333	7.84	3.57667	4.2225	4.3	4.245	4.735	3.89958	4.36083
317.547	4.21833	8.01833	3.62833	4.25917	4.35	4.29167	4.78167	3.94375	4.41042
317.756	4.19667	8.15333	3.63167	4.25333	4.325	4.29833	4.79333	3.9425	4.40333
317.965	4.19833	8.26833	3.61667	4.26	4.32167	4.30167	4.795	3.93833	4.40417
318.173	4.20833	8.41667	3.61333	4.25583	4.31333	4.30333	4.8	3.93458	4.40625
318.382	4.20667	8.55	3.615	4.29583	4.35167	4.33333	4.84167	3.95542	4.43333
318.591	4.215	8.68333	3.61	4.28583	4.33	4.34833	4.87667	3.94792	4.4425
318.8	4.21333	8.79	3.6	4.3225	4.345	4.37333	4.90667	3.96125	4.45958
319.009	4.22667	8.93167	3.625	4.35167	4.36	4.39	4.93667	3.98833	4.47833
319.218	4.18	9.04833	3.59667	4.325	4.32333	4.355	4.925	3.96083	4.44583
319.427	4.145	9.145	3.54167	4.30833	4.31167	4.34833	4.89	3.925	4.42375
319.635	4.17	9.25667	3.54333	4.31833	4.33333	4.35833	4.915	3.93083	4.44417
319.844	4.15667	9.33667	3.53167	4.30583	4.31	4.355	4.90833	3.91875	4.4325
320.053	4.17333	9.43667	3.56333	4.32917	4.35167	4.38333	4.94	3.94625	4.46208
320.262	4.17167	9.54167	3.55333	4.30917	4.35833	4.35667	4.93	3.93125	4.45417
320.471	4.18167	9.61667	3.56333	4.32667	4.39	4.36167	4.945	3.945	4.46958
320.679	4.155	9.675	3.51167	4.275	4.37	4.305	4.92833	3.89333	4.43958
320.888	4.135	9.75167	3.48833	4.26333	4.35333	4.27833	4.91667	3.87583	4.42083
321.097	4.115	9.82333	3.475	4.20833	4.33167	4.26833	4.88333	3.84167	4.39958
321.306	4.14833	9.93333	3.52833	4.24083	4.38167	4.32833	4.93	3.88458	4.44708
321.515	4.18	10.0533	3.57667	4.26	4.41833	4.395	4.96	3.91833	4.48833
321.723	4.18	10.1117	3.59167	4.275	4.40833	4.38167	4.97167	3.93333	4.48542
321.932	4.17167	10.205	3.61167	4.27667	4.39833	4.37167	4.98333	3.94417	4.48125
322.141	4.11333	10.2217	3.54667	4.26333	4.35333	4.32667	4.97333	3.905	4.44167
322.349	4.14833	10.3167	3.58667	4.29333	4.39167	4.36167	5.01167	3.94	4.47833
322.558	4.15833	10.4	3.605	4.31917	4.38667	4.39333	5.055	3.96208	4.49833
322.767	4.12	10.4167	3.60833	4.3075	4.34	4.39167	5.035	3.95792	4.47167
322.976	4.09167	10.4467	3.625	4.31167	4.31833	4.40333	5.04667	3.96833	4.465
323.184	4.13667	10.5067	3.675	4.35917	4.39	4.45333	5.085	4.01708	4.51625
323.393	4.10333	10.575	3.67667	4.35667	4.385	4.44667	5.06833	4.01667	4.50083
323.602	4.11167	10.6467	3.69333	4.38917	4.39167	4.46333	5.06167	4.04125	4.50708
323.81	4.12333	10.65	3.705	4.38917	4.39333	4.44667	5.05833	4.04708	4.50542
324.019	4.13833	10.6983	3.7	4.355	4.37667	4.465	5.06833	4.0275	4.51208
324.228	4.17333	10.78	3.75	4.42167	4.45333	4.545	5.12667	4.08583	4.57458
324.436	4.21	10.845	3.77167	4.39917	4.48833	4.55	5.11667	4.08542	4.59125
324.645	4.14167	10.82	3.69167	4.33417	4.40667	4.46167	5.04	4.01292	4.5125
324.853	4.12833	10.8333	3.69	4.3225	4.42	4.47333	5.02333	4.00625	4.51125
325.062	4.17667	10.9333	3.72	4.40083	4.48333	4.50667	5.06667	4.06042	4.55833
325.271	4.24167	11.0033	3.75667	4.43917	4.51	4.53333	5.08333	4.09792	4.59208
325.479	4.15833	10.9717	3.66167	4.36083	4.41833	4.45167	5.03167	4.01125	4.515
325.688	4.16833	10.955	3.64833	4.34667	4.40833	4.44833	5.01833	3.9975	4.51083
325.896	4.09333	10.915	3.57833	4.2775	4.35167	4.36833	4.95167	3.92792	4.44125
326.105	4.11167	10.9833	3.59667	4.31167	4.36833	4.39667	4.97167	3.95417	4.46208
326.313	4.09333	11.045	3.61667	4.34667	4.39667	4.40333	5.01167	3.98167	4.47625
326.522	4.08167	11.0233	3.58	4.3025	4.35167	4.355	4.98333	3.94125	4.44292
326.73	4.08333	11.065	3.6	4.35667	4.37667	4.395	5.01167	3.97833	4.46667
326.939	4.11167	11.1217	3.62667	4.37583	4.41333	4.42667	5.04	4.00125	4.49792
327.147	4.11667	11.1817	3.64333	4.3925	4.425	4.43167	5.07833	4.01792	4.51292
327.356	4.08167	11.1667	3.61833	4.3375	4.375	4.39333	5.03667	3.97792	4.47167
327.564	4.08667	11.18	3.61333	4.31917	4.36833	4.4	5.02333	3.96625	4.46958
327.773	4.095	11.235	3.66667	4.325	4.375	4.41167	5.025	3.99583	4.47667
327.981	4.12833	11.29	3.68833	4.37417	4.38167	4.43333	5.06667	4.03125	4.5025
328.19	4.18	11.3217	3.72167	4.42167	4.42333	4.475	5.12333	4.07167	4.55042
328.398	4.18667	11.3283	3.71667	4.41917	4.41833	4.45667	5.13833	4.06792	4.55
328.607	4.19167	11.325	3.71167	4.40667	4.39167	4.44333	5.10333	4.05917	4.5325
328.815	4.16667	11.3433	3.71	4.4275	4.37667	4.42833	5.09833	4.06875	4.5175
329.024	4.22167	11.41	3.76	4.45917	4.42167	4.465	5.13667	4.10958	4.56125
329.232	4.18333	11.4	3.715	4.4425	4.38833	4.43	5.105	4.07875	4.52667
329.44	4.16	11.355	3.68333	4.41583	4.33833	4.39333	5.04833	4.04958	4.485
329.649	4.17	11.3667	3.67333	4.41167	4.315	4.39167	5.04667	4.0425	4.48083
329.857	4.16667	11.3983	3.68833	4.4375	4.33833	4.41167	5.075	4.06292	4.49792
330.066	4.21	11.4483	3.71333	4.48083	4.37333	4.43667	5.09833	4.09708	4.52958
330.274	4.18333	11.4467	3.70167	4.46333	4.365	4.42	5.08667	4.0825	4.51375
330.482	4.18667	11.49	3.70667	4.46917	4.36	4.42167	5.07667	4.08792	4.51125
330.691	4.17833	11.485	3.72167	4.4825	4.35833	4.43167	5.04833	4.10208	4.50417
330.899	4.22667	11.5233	3.75667	4.5125	4.38833	4.46667	5.05667	4.13458	4.53458
331.107	4.23667	11.555	3.77333	4.5075	4.40833	4.45833	5.05333	4.14042	4.53917
331.316	4.20167	11.5217	3.74667	4.48417	4.345	4.42833	5.00167	4.11542	4.49417
331.524	4.255	11.5533	3.78333	4.51833	4.36333	4.43833	5.03	4.15083	4.52167
331.732	4.30833	11.615	3.83667	4.58917	4.42	4.49333	5.07333	4.21292	4.57375
331.94	4.325	11.6767	3.86833	4.63667	4.47167	4.55	5.11833	4.2525	4.61625
332.149	4.26333	11.65	3.82333	4.585	4.41167	4.46667	5.06167	4.20417	4.55083
332.357	4.26167	11.6717	3.85	4.6325	4.44	4.51667	5.10333	4.24125	4.58042
332.565	4.285	11.7283	3.89167	4.68	4.48833	4.53833	5.12833	4.28583	4.61
332.774	4.245	11.7067	3.87333	4.64	4.45833	4.51167	5.115	4.25667	4.5825
332.982	4.21167	11.74	3.835	4.60417	4.43167	4.49333	5.10833	4.21958	4.56125
333.19	4.24333	11.8133	3.89	4.64833	4.47667	4.53833	5.16333	4.26917	4.60542
333.398	4.26333	11.8367	3.91833	4.66	4.50167	4.57667	5.18	4.28917	4.63042
333.606	4.21167	11.815	3.89	4.61583	4.46	4.51	5.155	4.25292	4.58417
333.815	4.20833	11.865	3.91333	4.64083	4.5	4.55167	5.17167	4.27708	4.60792
334.023	4.21333	11.91	3.95333	4.65167	4.52167	4.58667	5.205	4.3025	4.63167
334.231	4.15833	11.885	3.93333	4.61	4.475	4.51167	5.15167	4.27167	4.57417
334.439	4.235	11.9383	3.99667	4.6775	4.515	4.56833	5.21167	4.33708	4.6325
334.647	4.18167	11.9067	3.92333	4.61667	4.45333	4.51833	5.145	4.27	4.57458
334.856	4.24	11.9567	3.96	4.67167	4.48667	4.57333	5.19167	4.31583	4.62292
335.064	4.24333	11.9767	3.95333	4.67083	4.49167	4.585	5.19667	4.31208	4.62917
335.272	4.29	12.0133	3.99167	4.7375	4.52333	4.63833	5.24833	4.36458	4.675
335.48	4.28667	11.9783	3.95167	4.7375	4.49333	4.61667	5.23	4.34458	4.65667
335.688	4.27	11.9933	3.92667	4.75583	4.475	4.62333	5.22	4.34125	4.64708
335.896	4.325	12.0717	3.96	4.82417	4.51667	4.67833	5.28	4.39208	4.7
336.104	4.28833	12.0533	3.96167	4.78833	4.46833	4.65167	5.265	4.375	4.66833
336.312	4.23833	12.0267	3.93167	4.75917	4.42667	4.58167	5.215	4.34542	4.61542
336.521	4.235	12.0267	3.91333	4.75667	4.425	4.59	5.215	4.335	4.61625
336.729	4.19667	12.0283	3.89667	4.75	4.40167	4.59	5.19333	4.32333	4.59542
336.937	4.24	12.0633	3.98	4.77583	4.42333	4.61667	5.23167	4.37792	4.62792
337.145	4.18667	12.0417	3.97	4.73833	4.385	4.55667	5.19833	4.35417	4.58167
337.353	4.18333	12.06	3.98333	4.76833	4.37333	4.55	5.205	4.37583	4.57792
337.561	4.13667	12.0183	3.96167	4.71917	4.36167	4.49833	5.155	4.34042	4.53792
337.769	4.10833	12.03	3.965	4.69417	4.335	4.475	5.16	4.32958	4.51958
337.977	4.12333	12.0633	4.00333	4.71	4.365	4.49	5.18	4.35667	4.53958
338.185	4.11	12.055	4.01667	4.71917	4.36667	4.48333	5.155	4.36792	4.52875
338.393	4.11	12.0517	4.00167	4.72083	4.36	4.475	5.15833	4.36125	4.52583
338.601	4.08833	12.0383	3.965	4.685	4.33833	4.44833	5.15333	4.325	4.50708
338.809	4.175	12.1283	4.04833	4.7725	4.43333	4.515	5.24333	4.41042	4.59167
339.017	4.17833	12.1633	4.05667	4.80417	4.45833	4.51167	5.26667	4.43042	4.60375
339.225	4.16833	12.195	4.02167	4.80917	4.465	4.5	5.25833	4.41542	4.59792
339.433	4.17333	12.2117	4.03	4.83167	4.47167	4.51667	5.26333	4.43083	4.60625
339.641	4.19333	12.245	4.03333	4.84917	4.49833	4.52833	5.27667	4.44125	4.62417
339.849	4.24667	12.3233	4.07833	4.89833	4.54167	4.56	5.31667	4.48833	4.66625
340.057	4.215	12.3067	4.05167	4.89417	4.53333	4.53	5.28	4.47292	4.63958
340.264	4.20667	12.3033	4.05	4.9	4.48833	4.52333	5.26167	4.475	4.62
340.472	4.235	12.3283	4.07167	4.91833	4.50333	4.54333	5.27833	4.495	4.64
340.68	4.25833	12.3717	4.11333	4.96917	4.53	4.56	5.30167	4.54125	4.6625
340.888	4.26333	12.4033	4.115	5	4.52667	4.58167	5.28667	4.5575	4.66458
341.096	4.22667	12.405	4.1	4.9975	4.495	4.55333	5.275	4.54875	4.6375
341.304	4.235	12.43	4.115	5.00333	4.51167	4.595	5.28167	4.55917	4.65583
341.512	4.25167	12.4467	4.13667	5.03	4.53333	4.60167	5.30167	4.58333	4.67208
341.72	4.23667	12.4717	4.13167	5.0275	4.53	4.60333	5.29667	4.57958	4.66667
341.927	4.22667	12.5083	4.135	5.0225	4.52167	4.59333	5.31	4.57875	4.66292
342.135	4.225	12.535	4.15	5.0425	4.51167	4.61333	5.34833	4.59625	4.67458
342.343	4.23833	12.5733	4.17667	5.0675	4.51333	4.62667	5.385	4.62208	4.69083
342.551	4.22333	12.605	4.14833	5.06	4.53833	4.60333	5.39833	4.60417	4.69083
342.759	4.21333	12.6367	4.135	5.07833	4.53667	4.61	5.42167	4.60667	4.69542
342.967	4.16667	12.6167	4.09667	5.05167	4.49333	4.59	5.39333	4.57417	4.66083
343.174	4.225	12.6883	4.16833	5.12833	4.54333	4.64667	5.485	4.64833	4.725
343.382	4.23167	12.7067	4.155	5.12583	4.53667	4.65833	5.46333	4.64042	4.7225
343.59	4.255	12.73	4.175	5.165	4.55167	4.665	5.47667	4.67	4.73708
343.798	4.27667	12.7617	4.19	5.1825	4.56	4.69333	5.50833	4.68625	4.75958
344.005	4.26833	12.7717	4.175	5.18833	4.55833	4.66667	5.495	4.68167	4.74708
344.213	4.26333	12.7667	4.19667	5.20083	4.54833	4.66333	5.485	4.69875	4.74
344.421	4.26667	12.7983	4.21333	5.2125	4.54833	4.665	5.48	4.71292	4.74
344.629	4.35	12.9083	4.27167	5.2775	4.64167	4.75167	5.54667	4.77458	4.8225
344.836	4.36833	12.9583	4.31167	5.3225	4.65667	4.78833	5.56833	4.81708	4.84542
345.044	4.39833	13.0033	4.345	5.32833	4.67333	4.79167	5.58333	4.83667	4.86167
345.252	4.465	13.0967	4.39833	5.38583	4.72667	4.835	5.63167	4.89208	4.91458
345.459	4.46833	13.1267	4.405	5.38833	4.75333	4.86667	5.63	4.89667	4.92958
345.667	4.45	13.1517	4.40333	5.40167	4.73167	4.86	5.63667	4.9025	4.91958
345.875	4.43333	13.1583	4.38833	5.37667	4.69833	4.83667	5.625	4.8825	4.89833
346.082	4.44	13.2017	4.40167	5.405	4.725	4.82667	5.62833	4.90333	4.905
346.29	4.51333	13.2933	4.46667	5.46333	4.75333	4.885	5.69833	4.965	4.9625
346.498	4.54333	13.3683	4.52667	5.52167	4.80167	4.91333	5.74667	5.02417	5.00125
346.705	4.54	13.3917	4.52333	5.51667	4.79667	4.89833	5.745	5.02	4.995
346.913	4.495	13.3683	4.52	5.4925	4.77	4.87333	5.72333	5.00625	4.96542
347.12	4.48833	13.3667	4.51	5.49	4.75	4.87	5.72667	5	4.95875
347.328	4.46333	13.375	4.51667	5.5075	4.74333	4.86667	5.70833	5.01208	4.94542
347.536	4.425	13.3683	4.49	5.4975	4.72	4.83667	5.68333	4.99375	4.91625
347.743	4.41667	13.375	4.48333	5.50833	4.70333	4.80667	5.66333	4.99583	4.8975
347.951	4.46833	13.43	4.54333	5.5475	4.75333	4.85167	5.71333	5.04542	4.94667
348.158	4.495	13.4833	4.58667	5.59333	4.79667	4.87833	5.75667	5.09	4.98167
348.366	4.525	13.5483	4.64	5.65	4.82	4.92167	5.80333	5.145	5.0175
348.573	4.545	13.5817	4.67833	5.6775	4.86833	4.95	5.83667	5.17792	5.05
348.781	4.545	13.5967	4.66833	5.68917	4.85333	4.955	5.83833	5.17875	5.04792
348.988	4.55167	13.6367	4.69667	5.73167	4.86	4.98833	5.85667	5.21417	5.06417
349.196	4.53833	13.6717	4.7	5.74833	4.825	4.96833	5.86	5.22417	5.04792
349.404	4.58833	13.7683	4.76667	5.81333	4.88333	5.01833	5.90167	5.29	5.09792
349.611	4.635	13.8467	4.80333	5.85667	4.925	5.04167	5.955	5.33	5.13917
349.818	4.71333	13.9483	4.89667	5.95583	5.01167	5.14	6.055	5.42625	5.23
350.026	4.75	14.0283	4.96333	6.00417	5.05	5.165	6.12333	5.48375	5.27208
350.233	4.735	14.0617	4.96167	6.0075	5.03667	5.155	6.11333	5.48458	5.26
350.441	4.75667	14.14	4.99667	6.06	5.065	5.19833	6.14667	5.52833	5.29167
350.648	4.745	14.1733	4.99167	6.05583	5.02667	5.185	6.12833	5.52375	5.27125
350.856	4.72833	14.2067	4.985	6.07833	5.00167	5.18833	6.11667	5.53167	5.25875
351.063	4.75333	14.2683	5.01667	6.11417	5.04	5.21833	6.14	5.56542	5.28792
351.271	4.73833	14.3033	5.005	6.13	5.05167	5.21167	6.14167	5.5675	5.28583
351.478	4.79667	14.3767	5.05667	6.20917	5.12333	5.27167	6.21	5.63292	5.35042
351.685	4.79333	14.4	5.065	6.235	5.11	5.25333	6.225	5.65	5.34542
351.893	4.80833	14.4767	5.095	6.285	5.145	5.3	6.27833	5.69	5.38292
352.1	4.79	14.5133	5.07167	6.2675	5.12333	5.29333	6.275	5.66958	5.37042
352.308	4.77667	14.53	5.06833	6.26583	5.11667	5.28333	6.25333	5.66708	5.3575
352.515	4.79667	14.5867	5.09667	6.31417	5.13833	5.30833	6.285	5.70542	5.38208
352.722	4.76167	14.5983	5.08333	6.30667	5.09667	5.29	6.26	5.695	5.35208
352.93	4.765	14.63	5.095	6.32417	5.13167	5.29	6.28333	5.70958	5.3675
353.137	4.76667	14.6517	5.105	6.33	5.11833	5.27167	6.30333	5.7175	5.365
353.344	4.76833	14.685	5.125	6.335	5.12833	5.28	6.31667	5.73	5.37333
353.551	4.80333	14.7567	5.17833	6.37167	5.145	5.31167	6.345	5.775	5.40125
353.759	4.77833	14.7967	5.17833	6.37667	5.11333	5.29833	6.32333	5.7775	5.37833
353.966	4.78667	14.855	5.215	6.38333	5.13667	5.32167	6.33833	5.79917	5.39583
354.173	4.79	14.89	5.26167	6.41333	5.13667	5.335	6.34	5.8375	5.40042
354.381	4.78167	14.9133	5.26833	6.44167	5.11667	5.325	6.325	5.855	5.38708
354.588	4.81333	14.9817	5.29833	6.47917	5.13333	5.36667	6.37333	5.88875	5.42167
354.795	4.86167	15.06	5.37167	6.5275	5.185	5.425	6.435	5.94958	5.47667
355.002	4.91667	15.2033	5.46667	6.605	5.26167	5.47667	6.53	6.03583	5.54625
355.21	4.94333	15.27	5.51833	6.6425	5.27667	5.52	6.58167	6.08042	5.58042
355.417	4.955	15.3383	5.54167	6.67667	5.30167	5.55333	6.61	6.10917	5.605
355.624	4.98333	15.42	5.58667	6.75917	5.32333	5.6	6.65667	6.17292	5.64083
355.831	4.97667	15.4583	5.58	6.78333	5.31667	5.585	6.67333	6.18167	5.63792
356.038	5.04333	15.5483	5.66333	6.84333	5.39	5.655	6.74667	6.25333	5.70875
356.246	5.085	15.65	5.71833	6.9325	5.435	5.71167	6.81333	6.32542	5.76125
356.453	5.09833	15.7	5.73167	6.965	5.455	5.72	6.83833	6.34833	5.77792
356.66	5.155	15.8	5.795	7.02083	5.505	5.75667	6.88833	6.40792	5.82625
356.867	5.15833	15.8467	5.81667	7.0525	5.50833	5.755	6.91	6.43458	5.83292
357.074	5.195	15.95	5.87	7.1275	5.555	5.77333	6.965	6.49875	5.87208
357.281	5.215	15.955	5.87167	7.14417	5.53167	5.76167	6.94333	6.50792	5.86292
357.489	5.22833	16.005	5.9	7.185	5.55333	5.76833	6.95667	6.5425	5.87667
357.696	5.24	16.09	5.93333	7.22417	5.57167	5.79	6.98333	6.57875	5.89625
357.903	5.22167	16.125	5.925	7.23083	5.565	5.76667	6.96167	6.57792	5.87875
358.11	5.28667	16.2133	6.00833	7.29917	5.63667	5.83667	7.025	6.65375	5.94625
358.317	5.29833	16.3067	6.04167	7.36917	5.65	5.85167	7.06667	6.70542	5.96667
358.524	5.26833	16.325	6.02333	7.35583	5.62833	5.82667	7.05167	6.68958	5.94375
358.731	5.27333	16.385	6.05667	7.37583	5.64833	5.81833	7.06833	6.71625	5.95208
358.938	5.26833	16.4267	6.07667	7.4075	5.65333	5.81	7.07833	6.74208	5.9525
359.145	5.29333	16.515	6.145	7.47667	5.71	5.84833	7.125	6.81083	5.99417
359.352	5.27167	16.535	6.14333	7.49083	5.68667	5.85333	7.11333	6.81708	5.98125
359.559	5.26167	16.605	6.17333	7.5425	5.69	5.87833	7.13667	6.85792	5.99167
359.766	5.26	16.6717	6.2	7.57333	5.70833	5.88333	7.14167	6.88667	5.99833
359.973	5.255	16.7133	6.235	7.63083	5.72667	5.9	7.15167	6.93292	6.00833
360.18	5.30333	16.805	6.30833	7.6925	5.74667	5.935	7.20333	7.00042	6.04708
360.387	5.28167	16.865	6.32	7.72167	5.72833	5.91167	7.20167	7.02083	6.03083
360.594	5.23333	16.8633	6.3	7.695	5.685	5.85833	7.14	6.9975	5.97917
360.801	5.24667	16.9133	6.325	7.7275	5.68167	5.87833	7.14667	7.02625	5.98833
361.008	5.25167	16.9817	6.355	7.7925	5.665	5.90333	7.15333	7.07375	5.99333
361.215	5.25833	17.0583	6.41167	7.84167	5.68333	5.93333	7.18833	7.12667	6.01583
361.422	5.26	17.1467	6.43667	7.8925	5.68167	5.95167	7.18667	7.16458	6.02
361.629	5.255	17.2117	6.48	7.92	5.67	5.94333	7.18333	7.2	6.01292
361.836	5.29333	17.2983	6.54	7.98667	5.72333	5.965	7.22333	7.26333	6.05125
362.043	5.31667	17.395	6.605	8.07667	5.75667	6.01833	7.27833	7.34083	6.0925
362.25	5.36167	17.4933	6.67333	8.145	5.785	6.04333	7.31667	7.40917	6.12667
362.457	5.36167	17.56	6.70167	8.19083	5.80667	6.06	7.35333	7.44625	6.14542
362.664	5.38333	17.6283	6.76	8.2625	5.835	6.11333	7.40167	7.51125	6.18333
362.87	5.44	17.73	6.84667	8.36917	5.90167	6.185	7.47	7.60792	6.24917
363.077	5.45167	17.8233	6.90833	8.4375	5.935	6.20833	7.49667	7.67292	6.27292
363.284	5.46	17.8983	6.945	8.48167	5.965	6.24333	7.525	7.71333	6.29833
363.491	5.48667	17.975	6.98833	8.53	5.97667	6.27	7.53167	7.75917	6.31625
363.698	5.46833	18.0083	7.01167	8.55667	5.97167	6.255	7.52833	7.78417	6.30583
363.905	5.51	18.0983	7.07	8.6275	6.01333	6.29667	7.565	7.84875	6.34625
364.111	5.50333	18.1617	7.095	8.66833	6.01167	6.30833	7.57167	7.88167	6.34875
364.318	5.52833	18.23	7.15	8.72583	6.02833	6.325	7.59333	7.93792	6.36875
364.525	5.53167	18.295	7.18667	8.76417	6.04	6.32833	7.60167	7.97542	6.37542
364.732	5.54167	18.3683	7.24	8.8175	6.05333	6.34333	7.61	8.02875	6.38708
364.939	5.54667	18.4283	7.27	8.84083	6.05333	6.32667	7.60333	8.05542	6.3825
365.145	5.55333	18.4917	7.29667	8.88917	6.04333	6.325	7.6	8.09292	6.38042
365.352	5.565	18.5733	7.35333	8.96667	6.04333	6.345	7.62	8.16	6.39333
365.559	5.60333	18.6833	7.43833	9.05417	6.07333	6.35167	7.66333	8.24625	6.42292
365.766	5.63	18.775	7.50667	9.15583	6.09833	6.37333	7.7	8.33125	6.45042
365.972	5.705	18.9167	7.625	9.28917	6.16167	6.435	7.775	8.45708	6.51917
366.179	5.7	19.005	7.675	9.365	6.165	6.44333	7.78333	8.52	6.52292
366.386	5.745	19.1083	7.77167	9.4625	6.20333	6.49	7.82333	8.61708	6.56542
366.592	5.73833	19.2017	7.81667	9.525	6.205	6.48	7.82333	8.67083	6.56167
366.799	5.76333	19.3017	7.88333	9.62333	6.22167	6.51667	7.85833	8.75333	6.59
367.006	5.75667	19.3667	7.915	9.675	6.20167	6.50333	7.84	8.795	6.57542
367.212	5.8	19.4717	8.00333	9.7875	6.24333	6.55167	7.89167	8.89542	6.62167
367.419	5.82667	19.555	8.09333	9.86583	6.27667	6.57333	7.935	8.97958	6.65292
367.626	5.83	19.625	8.155	9.94333	6.295	6.58167	7.95	9.04917	6.66417
367.832	5.83667	19.6933	8.205	10.015	6.295	6.59	7.945	9.11	6.66667
368.039	5.845	19.7883	8.27833	10.0917	6.30667	6.60667	7.96167	9.185	6.68
368.246	5.84833	19.8817	8.335	10.1633	6.31333	6.61833	7.97833	9.24917	6.68958
368.452	5.875	19.9883	8.42167	10.2683	6.34167	6.645	8.02	9.345	6.72042
368.659	5.87333	20.0733	8.49	10.37	6.35667	6.64667	8.05	9.43	6.73167
368.865	5.91833	20.175	8.59	10.4633	6.38	6.69667	8.095	9.52667	6.7725
369.072	5.92667	20.26	8.68	10.5358	6.40167	6.72833	8.12667	9.60792	6.79583
369.279	5.96833	20.3683	8.79833	10.6625	6.45	6.78833	8.19333	9.73042	6.85
369.485	5.97667	20.4517	8.85833	10.7475	6.46	6.79667	8.20833	9.80292	6.86042
369.692	5.97667	20.5433	8.90833	10.8317	6.455	6.795	8.215	9.87	6.86042
369.898	5.98833	20.6333	8.97167	10.885	6.46833	6.8	8.23167	9.92833	6.87208
370.105	5.97	20.6967	9.02	10.9483	6.45167	6.795	8.22333	9.98417	6.86
370.311	5.95833	20.7517	9.08167	11.0133	6.44	6.78667	8.225	10.0475	6.8525
370.518	5.94167	20.835	9.125	11.0842	6.42833	6.785	8.22167	10.1046	6.84417
370.724	5.94	20.9183	9.18667	11.1575	6.42333	6.79	8.22	10.1721	6.84333
370.931	5.95	21.015	9.26167	11.2342	6.425	6.795	8.22667	10.2479	6.84917
371.137	5.935	21.08	9.31667	11.3067	6.435	6.79167	8.23167	10.3117	6.84833
371.344	5.94833	21.1783	9.415	11.4067	6.44333	6.79	8.255	10.4108	6.85917
371.55	5.98	21.2983	9.52167	11.5325	6.48333	6.81667	8.29833	10.5271	6.89458
371.757	6.03	21.435	9.64833	11.655	6.535	6.88333	8.34333	10.6517	6.94792
371.963	6.07	21.5533	9.77167	11.7933	6.57667	6.935	8.39667	10.7825	6.99458
372.17	6.12833	21.6833	9.89167	11.9242	6.63	6.98	8.46333	10.9079	7.05042
372.376	6.165	21.81	10.0333	12.08	6.68167	7.045	8.53	11.0567	7.10542
372.582	6.20167	21.9233	10.1367	12.2142	6.72833	7.07833	8.575	11.1754	7.14583
372.789	6.26167	22.0267	10.26	12.3283	6.765	7.13	8.64	11.2942	7.19917
372.995	6.275	22.1133	10.3517	12.4358	6.78333	7.13333	8.65	11.3938	7.21042
373.202	6.29167	22.19	10.4367	12.5317	6.805	7.15667	8.67667	11.4842	7.2325
373.408	6.31833	22.2933	10.525	12.66	6.84333	7.18333	8.70333	11.5925	7.26208
373.614	6.33333	22.3817	10.58	12.7542	6.86333	7.205	8.72	11.6671	7.28042
373.821	6.35167	22.4733	10.6683	12.8508	6.89833	7.22333	8.74833	11.7596	7.30542
374.027	6.30667	22.4917	10.7133	12.9108	6.84167	7.195	8.72833	11.8121	7.26792
374.233	6.30667	22.58	10.7817	13	6.87167	7.20833	8.74333	11.8908	7.2825
374.44	6.31333	22.6483	10.87	13.0925	6.88167	7.24167	8.75	11.9812	7.29667
374.646	6.32833	22.7217	10.9417	13.1717	6.87667	7.24333	8.75667	12.0567	7.30125
374.852	6.32833	22.8017	11.025	13.2658	6.885	7.25167	8.76167	12.1454	7.30667
375.058	6.33167	22.8967	11.1133	13.38	6.905	7.25833	8.76667	12.2467	7.31542
375.265	6.35833	22.9933	11.2133	13.4917	6.93167	7.28333	8.815	12.3525	7.34708
375.471	6.38167	23.0983	11.3133	13.6133	6.965	7.315	8.835	12.4633	7.37417
375.677	6.39167	23.19	11.405	13.7225	6.97	7.34	8.86	12.5637	7.39042
375.884	6.41	23.2767	11.515	13.8458	6.99167	7.35667	8.89	12.6804	7.41208
376.09	6.43833	23.3733	11.6033	13.9658	6.99833	7.38667	8.915	12.7846	7.43458
376.296	6.52333	23.5417	11.735	14.12	7.07833	7.45	8.98667	12.9275	7.50958
376.502	6.56167	23.6317	11.855	14.2433	7.09833	7.47833	9.025	13.0492	7.54083
376.708	6.57	23.73	11.9517	14.3658	7.1	7.495	9.05167	13.1587	7.55417
376.915	6.595	23.8367	12.0533	14.495	7.13667	7.52	9.08	13.2742	7.58292
377.121	6.65167	23.965	12.19	14.6333	7.18167	7.57667	9.15167	13.4117	7.64042
377.327	6.65167	24.0317	12.2733	14.7317	7.17	7.58833	9.175	13.5025	7.64625
377.533	6.66333	24.0983	12.3767	14.86	7.19667	7.60833	9.20667	13.6183	7.66875
377.739	6.67167	24.2033	12.4783	14.9692	7.21333	7.61667	9.24833	13.7237	7.6875
377.946	6.70333	24.3017	12.59	15.0742	7.24167	7.63833	9.27667	13.8321	7.715
378.152	6.72167	24.3867	12.6967	15.1833	7.26667	7.665	9.31167	13.94	7.74125
378.358	6.72167	24.4567	12.8117	15.2992	7.30167	7.68	9.34167	14.0554	7.76125
378.564	6.71167	24.5217	12.9133	15.4058	7.32	7.675	9.34833	14.1596	7.76375
378.77	6.71167	24.5933	13.01	15.5158	7.33833	7.70833	9.37333	14.2629	7.78292
378.976	6.73833	24.6833	13.11	15.6358	7.38333	7.73333	9.415	14.3729	7.8175
379.182	6.775	24.7833	13.22	15.7633	7.42167	7.77167	9.46333	14.4917	7.85792
379.388	6.79667	24.8633	13.3133	15.8825	7.455	7.79333	9.48833	14.5979	7.88333
379.594	6.82667	24.9533	13.435	15.9933	7.50167	7.84333	9.52167	14.7142	7.92333
379.8	6.87667	25.06	13.5367	16.1133	7.53167	7.87833	9.55333	14.825	7.96
380.007	6.905	25.1533	13.6467	16.2358	7.56	7.92	9.58667	14.9413	7.99292
380.213	6.95	25.2417	13.7517	16.3592	7.59667	7.96333	9.64333	15.0554	8.03833
380.419	6.97167	25.33	13.84	16.4725	7.60833	7.98833	9.66	15.1562	8.05708
380.625	7.00167	25.4167	13.9233	16.575	7.61833	8.02	9.69167	15.2492	8.08292
380.831	7.04667	25.525	14.0217	16.6925	7.65167	8.06	9.745	15.3571	8.12583
381.037	7.08833	25.6333	14.11	16.8058	7.66667	8.07167	9.765	15.4579	8.14792
381.243	7.12667	25.7517	14.2383	16.9542	7.69333	8.11	9.80667	15.5962	8.18417
381.449	7.155	25.8583	14.3717	17.0908	7.73	8.145	9.85833	15.7312	8.22208
381.655	7.195	25.99	14.5033	17.2208	7.77	8.20167	9.915	15.8621	8.27042
381.861	7.22667	26.09	14.6167	17.3558	7.80667	8.23	9.96667	15.9863	8.3075
382.066	7.24833	26.1967	14.7533	17.4808	7.85	8.27833	10.02	16.1171	8.34917
382.272	7.29833	26.295	14.8817	17.63	7.91	8.33167	10.0817	16.2558	8.40542
382.478	7.285	26.355	14.9733	17.7233	7.91333	8.34667	10.0833	16.3483	8.40708
382.684	7.305	26.4483	15.085	17.8375	7.955	8.385	10.125	16.4612	8.4425
382.89	7.34333	26.5617	15.2233	17.985	8.00833	8.44	10.19	16.6042	8.49542
383.096	7.35667	26.635	15.3267	18.0875	8.03167	8.48167	10.2267	16.7071	8.52417
383.302	7.38333	26.735	15.45	18.2217	8.07667	8.53167	10.2883	16.8358	8.57
383.508	7.42833	26.8433	15.58	18.34	8.12667	8.58333	10.35	16.96	8.62208
383.714	7.45167	26.935	15.6733	18.4383	8.14167	8.61167	10.3883	17.0558	8.64833
383.92	7.48667	27.0117	15.7733	18.56	8.175	8.64333	10.435	17.1667	8.685
384.125	7.54	27.15	15.9117	18.7125	8.23167	8.70333	10.4983	17.3121	8.74333
384.331	7.56833	27.2533	16.035	18.8517	8.26	8.745	10.5567	17.4433	8.7825
384.537	7.59333	27.335	16.14	18.9533	8.27667	8.76333	10.6	17.5467	8.80833
384.743	7.66	27.4533	16.2783	19.1192	8.34333	8.835	10.6867	17.6987	8.88125
384.949	7.735	27.5717	16.4283	19.2817	8.415	8.91333	10.7817	17.855	8.96125
385.155	7.79	27.6967	16.5717	19.4325	8.47333	8.97167	10.8567	18.0021	9.02292
385.36	7.86667	27.8333	16.715	19.6075	8.555	9.045	10.9433	18.1613	9.1025
385.566	7.93	27.92	16.8533	19.7508	8.605	9.11667	11.02	18.3021	9.16792
385.772	7.96	27.99	16.9633	19.8558	8.64333	9.15667	11.07	18.4096	9.2075
385.978	8.01333	28.0917	17.0733	19.9925	8.7	9.225	11.1533	18.5329	9.27292
386.183	8.03667	28.17	17.1867	20.1058	8.73	9.25833	11.2017	18.6463	9.30667
386.389	8.07167	28.2333	17.29	20.2058	8.77	9.29833	11.26	18.7479	9.35
386.595	8.12667	28.32	17.3933	20.3267	8.82667	9.34667	11.3117	18.86	9.40292
386.801	8.18667	28.435	17.52	20.4525	8.88833	9.41667	11.3967	18.9862	9.47208
387.006	8.23833	28.5367	17.64	20.5633	8.935	9.46	11.4567	19.1017	9.5225
387.212	8.26667	28.625	17.7467	20.6892	8.97167	9.49333	11.4967	19.2179	9.55708
387.418	8.29333	28.7067	17.8433	20.7742	9	9.51833	11.5333	19.3087	9.58625
387.623	8.315	28.77	17.9433	20.8642	9.02167	9.56	11.58	19.4038	9.61917
387.829	8.36167	28.89	18.0633	20.9783	9.095	9.60833	11.645	19.5208	9.6775
388.035	8.42833	29.0017	18.18	21.1267	9.16	9.68333	11.725	19.6533	9.74917
388.24	8.48167	29.1017	18.31	21.2675	9.21833	9.74667	11.7867	19.7888	9.80833
388.446	8.54333	29.2017	18.4233	21.3967	9.28667	9.81333	11.865	19.91	9.87708
388.652	8.58333	29.2967	18.5217	21.5042	9.32167	9.87	11.915	20.0129	9.9225
388.857	8.64	29.3983	18.6467	21.615	9.39167	9.94667	11.99	20.1308	9.99208
389.063	8.68667	29.495	18.7733	21.7467	9.45667	10.0083	12.05	20.26	10.0504
389.268	8.73833	29.6067	18.8783	21.865	9.51	10.0767	12.125	20.3717	10.1125
389.474	8.79333	29.6933	18.985	21.9775	9.555	10.125	12.19	20.4812	10.1658
389.68	8.87333	29.79	19.1183	22.1117	9.63167	10.2117	12.2767	20.615	10.2483
389.885	8.93833	29.9	19.2367	22.24	9.70333	10.28	12.355	20.7383	10.3192
390.091	8.975	29.97	19.315	22.3575	9.73833	10.3283	12.4083	20.8362	10.3625
390.296	9.01667	30.055	19.4217	22.4483	9.78	10.3667	12.46	20.935	10.4058
390.502	9.08667	30.1583	19.545	22.5617	9.84167	10.43	12.53	21.0533	10.4721
390.707	9.14333	30.245	19.6633	22.6708	9.9	10.5067	12.6083	21.1671	10.5396
390.913	9.21667	30.36	19.8017	22.8258	9.97667	10.5967	12.7117	21.3137	10.6254
391.118	9.28667	30.4667	19.9233	22.9608	10.0367	10.6617	12.7983	21.4421	10.6958
391.324	9.345	30.5617	20.0417	23.0683	10.0817	10.7317	12.8817	21.555	10.76
391.529	9.40333	30.655	20.1617	23.1933	10.155	10.8033	12.965	21.6775	10.8317
391.735	9.47167	30.7433	20.2583	23.2917	10.2167	10.88	13.0517	21.775	10.905
391.94	9.53167	30.83	20.3683	23.4125	10.2717	10.9417	13.13	21.8904	10.9688
392.146	9.60167	30.9233	20.4833	23.5158	10.3367	11.0067	13.205	21.9996	11.0375
392.351	9.68833	31.0483	20.6367	23.645	10.4317	11.0967	13.315	22.1408	11.1329
392.557	9.76333	31.1367	20.7517	23.7817	10.5117	11.1883	13.4117	22.2667	11.2188
392.762	9.84667	31.2317	20.8783	23.9025	10.6067	11.2867	13.515	22.3904	11.3138
392.968	9.935	31.3417	21.0033	24.0225	10.7017	11.3767	13.62	22.5129	11.4083
393.173	10.0183	31.445	21.1333	24.13	10.7983	11.4633	13.725	22.6317	11.5012
393.378	10.08	31.5317	21.235	24.2208	10.8617	11.5383	13.8	22.7279	11.57
393.584	10.155	31.6117	21.325	24.3342	10.94	11.6067	13.875	22.8296	11.6442
393.789	10.225	31.675	21.4317	24.435	11.0117	11.675	13.9633	22.9333	11.7188
393.994	10.315	31.7867	21.5683	24.5567	11.1083	11.77	14.075	23.0625	11.8171
394.2	10.38	31.8867	21.685	24.6708	11.195	11.8517	14.175	23.1779	11.9004
394.405	10.48	31.9933	21.8133	24.7983	11.2883	11.9533	14.2933	23.3058	12.0037
394.61	10.5683	32.075	21.925	24.8908	11.3633	12.05	14.3917	23.4079	12.0933
394.816	10.6567	32.1733	22.0467	25.0042	11.4567	12.145	14.5017	23.5254	12.19
395.021	10.7167	32.265	22.1417	25.0875	11.5217	12.2	14.595	23.6146	12.2583
395.226	10.8017	32.3667	22.2633	25.2042	11.6067	12.28	14.6983	23.7338	12.3467
395.432	10.8983	32.455	22.3717	25.3275	11.685	12.355	14.7917	23.8496	12.4325
395.637	11	32.575	22.495	25.45	11.7817	12.46	14.91	23.9725	12.5379
395.842	11.0967	32.6683	22.6267	25.5708	11.8783	12.5767	15.045	24.0987	12.6492
396.048	11.1967	32.7783	22.7467	25.685	11.9767	12.69	15.1583	24.2158	12.7554
396.253	11.2817	32.8683	22.8383	25.7808	12.0583	12.7767	15.2517	24.3096	12.8421
396.458	11.39	32.9567	22.9333	25.8692	12.1517	12.88	15.3583	24.4012	12.945
396.663	11.4667	33.03	23.0183	25.9533	12.2217	12.9567	15.4433	24.4858	13.0221
396.868	11.545	33.1267	23.1117	26.0542	12.3067	13.0383	15.5383	24.5829	13.1071
397.074	11.645	33.225	23.215	26.1567	12.3917	13.125	15.6333	24.6858	13.1988
397.279	11.7283	33.3117	23.3167	26.2792	12.48	13.2317	15.7383	24.7979	13.2946
397.484	11.815	33.405	23.425	26.3858	12.565	13.3317	15.8433	24.9054	13.3887
397.689	11.9083	33.5083	23.5467	26.4792	12.6567	13.435	15.9533	25.0129	13.4883
397.894	12.0183	33.62	23.6683	26.6033	12.7617	13.5567	16.085	25.1358	13.6054
398.1	12.1217	33.745	23.79	26.7092	12.875	13.6767	16.1967	25.2496	13.7175
398.305	12.2367	33.86	23.8967	26.8225	12.98	13.7867	16.33	25.3596	13.8333
398.51	12.355	33.9717	24.03	26.955	13.0933	13.9317	16.4683	25.4925	13.9621
398.715	12.4583	34.0817	24.1633	27.0858	13.1967	14.0483	16.6067	25.6246	14.0775
398.92	12.5467	34.175	24.2667	27.1933	13.29	14.1483	16.73	25.73	14.1788
399.125	12.6617	34.2833	24.38	27.3225	13.415	14.2817	16.88	25.8513	14.3096
399.33	12.76	34.3717	24.4883	27.41	13.525	14.4033	17.0167	25.9492	14.4262
399.535	12.91	34.495	24.63	27.5242	13.6567	14.555	17.18	26.0771	14.5754
399.74	13.03	34.6067	24.7533	27.625	13.7667	14.68	17.31	26.1892	14.6967
399.946	13.14	34.6983	24.8617	27.7258	13.8883	14.815	17.455	26.2938	14.8246
400.151	13.2517	34.7933	24.9667	27.8258	14.0017	14.925	17.5883	26.3962	14.9417
400.356	13.3767	34.8833	25.07	27.9317	14.115	15.0433	17.73	26.5008	15.0663
400.561	13.4767	34.9783	25.1817	28.0225	14.225	15.16	17.8617	26.6021	15.1808
400.766	13.585	35.0717	25.2733	28.1092	14.3433	15.26	17.995	26.6913	15.2958
400.971	13.6867	35.1517	25.3733	28.1967	14.4483	15.3817	18.1133	26.785	15.4075
401.176	13.82	35.265	25.49	28.2975	14.5833	15.5217	18.2533	26.8937	15.5446
401.381	13.9483	35.3667	25.6117	28.4017	14.7017	15.6467	18.395	27.0067	15.6729
401.586	14.06	35.4617	25.725	28.4817	14.81	15.7617	18.5267	27.1033	15.7896
401.791	14.175	35.5683	25.8383	28.5992	14.935	15.8967	18.665	27.2188	15.9179
401.996	14.3067	35.66	25.9233	28.6933	15.065	16.0183	18.8083	27.3083	16.0496
402.201	14.4267	35.7567	26.025	28.7967	15.19	16.1367	18.95	27.4108	16.1758
402.406	14.5367	35.8133	26.1	28.8758	15.2917	16.2367	19.0683	27.4879	16.2833
402.61	14.6433	35.9083	26.19	28.9567	15.3883	16.3383	19.1883	27.5733	16.3896
402.815	14.78	36.02	26.295	29.0725	15.5133	16.4633	19.3317	27.6838	16.5221
403.02	14.89	36.1083	26.4067	29.1617	15.6267	16.5833	19.47	27.7842	16.6425
403.225	15.025	36.2233	26.5317	29.2733	15.77	16.7233	19.625	27.9025	16.7858
403.43	15.1317	36.295	26.63	29.365	15.8817	16.8483	19.75	27.9975	16.9029
403.635	15.27	36.415	26.7567	29.4733	16.025	16.995	19.9033	28.115	17.0483
403.84	15.4033	36.5	26.865	29.59	16.1583	17.1283	20.0517	28.2275	17.1854
404.045	15.53	36.59	26.9633	29.6858	16.2817	17.2467	20.205	28.3246	17.3158
404.25	15.655	36.6833	27.0933	29.7767	16.4033	17.39	20.3583	28.435	17.4517
404.454	15.7933	36.7867	27.1967	29.8692	16.5117	17.53	20.5033	28.5329	17.5846
404.659	15.9333	36.9183	27.3267	29.9683	16.6583	17.685	20.6667	28.6475	17.7358
404.864	16.0733	37.0183	27.4483	30.0633	16.7933	17.83	20.8217	28.7558	17.8796
405.069	16.1933	37.0983	27.5333	30.1333	16.9117	17.9517	20.9483	28.8333	18.0013
405.274	16.33	37.195	27.6433	30.2175	17.0367	18.1017	21.0883	28.9304	18.1392
405.478	16.4317	37.2683	27.7033	30.2833	17.12	18.19	21.2067	28.9933	18.2371
405.683	16.58	37.3717	27.8183	30.3775	17.2567	18.3383	21.3667	29.0979	18.3854
405.888	16.6517	37.425	27.8833	30.4192	17.3283	18.4317	21.4617	29.1512	18.4683
406.093	16.7567	37.505	27.9733	30.4892	17.425	18.545	21.5833	29.2312	18.5775
406.297	16.855	37.58	28.0433	30.5583	17.515	18.6383	21.6917	29.3008	18.675
406.502	16.9683	37.6667	28.115	30.6367	17.6183	18.7483	21.81	29.3758	18.7862
406.707	17.0533	37.7233	28.2	30.695	17.715	18.8417	21.925	29.4475	18.8837
406.912	17.1567	37.79	28.2817	30.7742	17.81	18.9417	22.0433	29.5279	18.9879
407.116	17.2433	37.8583	28.3617	30.8517	17.9	19.0383	22.15	29.6067	19.0829
407.321	17.3417	37.9283	28.465	30.9292	17.9933	19.1367	22.265	29.6971	19.1842
407.526	17.45	38	28.5367	31.0075	18.0917	19.24	22.3883	29.7721	19.2925
407.73	17.555	38.0833	28.63	31.085	18.195	19.365	22.4983	29.8575	19.4033
407.935	17.6533	38.1717	28.71	31.1642	18.275	19.4517	22.6067	29.9371	19.4967
408.14	17.7633	38.245	28.8033	31.2592	18.385	19.5567	22.7267	30.0312	19.6079
408.344	17.8717	38.3283	28.8867	31.3283	18.4783	19.6517	22.8317	30.1075	19.7083
408.549	17.9767	38.4217	28.9833	31.4125	18.5683	19.7683	22.9367	30.1979	19.8125
408.754	18.0683	38.4967	29.0667	31.4842	18.65	19.865	23.04	30.2754	19.9058
408.958	18.1783	38.5867	29.1667	31.5817	18.75	19.9717	23.1367	30.3742	20.0092
409.163	18.2517	38.6567	29.2383	31.6508	18.8167	20.05	23.2183	30.4446	20.0842
409.367	18.34	38.7267	29.32	31.7275	18.8983	20.1417	23.3067	30.5237	20.1717
409.572	18.425	38.8283	29.3933	31.8158	18.9767	20.2317	23.3983	30.6046	20.2579
409.777	18.4917	38.905	29.4817	31.8917	19.0533	20.3017	23.47	30.6867	20.3292
409.981	18.5983	38.9967	29.58	31.9775	19.1533	20.3833	23.5767	30.7787	20.4279
410.186	18.6633	39.0417	29.6433	32.0242	19.2117	20.4483	23.6617	30.8338	20.4962
410.39	18.7483	39.1583	29.7233	32.0983	19.2917	20.535	23.745	30.9108	20.58
410.595	18.825	39.2467	29.8067	32.1775	19.3683	20.625	23.8417	30.9921	20.665
410.799	18.8933	39.3117	29.8967	32.2358	19.455	20.6933	23.92	31.0662	20.7404
411.004	18.9767	39.3867	29.9817	32.3225	19.545	20.7633	24.015	31.1521	20.825
411.208	19.02	39.465	30.035	32.3783	19.595	20.82	24.08	31.2067	20.8787
411.413	19.0817	39.545	30.1133	32.4275	19.6683	20.8983	24.1517	31.2704	20.95
411.617	19.1583	39.635	30.1867	32.475	19.73	20.97	24.2233	31.3308	21.0204
411.822	19.2167	39.6967	30.265	32.535	19.7933	21.0533	24.3083	31.4	21.0929
412.026	19.2767	39.7767	30.335	32.5967	19.8467	21.115	24.375	31.4658	21.1533
412.231	19.3267	39.8483	30.4117	32.6467	19.895	21.1783	24.4283	31.5292	21.2071
412.435	19.3933	39.9367	30.4933	32.7258	19.9617	21.2533	24.5	31.6096	21.2771
412.639	19.4283	39.9733	30.55	32.7742	20	21.29	24.5417	31.6621	21.315
412.844	19.4717	40.0317	30.6117	32.835	20.0417	21.3483	24.5933	31.7233	21.3638
413.048	19.515	40.1	30.6817	32.8967	20.0917	21.3983	24.6567	31.7892	21.4154
413.253	19.5633	40.1767	30.7633	32.965	20.135	21.4683	24.71	31.8642	21.4692
413.457	19.6233	40.24	30.8467	33.0333	20.1917	21.525	24.7867	31.94	21.5317
413.661	19.6967	40.3217	30.9333	33.1267	20.255	21.5983	24.8683	32.03	21.6046
413.866	19.755	40.3933	31.025	33.2225	20.3117	21.6533	24.9417	32.1238	21.6654
414.07	19.8117	40.4817	31.1083	33.2883	20.37	21.7183	25	32.1983	21.725
414.274	19.89	40.555	31.2	33.3658	20.44	21.7833	25.0767	32.2829	21.7975
414.479	19.925	40.61	31.2583	33.4283	20.48	21.8333	25.135	32.3433	21.8433
414.683	19.985	40.6983	31.3367	33.5017	20.53	21.8933	25.1883	32.4192	21.8992
414.887	20.0467	40.7733	31.415	33.5575	20.5883	21.95	25.2733	32.4862	21.9646
415.092	20.105	40.8417	31.4733	33.6167	20.6383	21.995	25.325	32.545	22.0158
415.296	20.195	40.94	31.5633	33.7125	20.7167	22.075	25.42	32.6379	22.1017
415.5	20.2467	41.0017	31.6383	33.7633	20.77	22.12	25.4717	32.7008	22.1521
415.705	20.315	41.0883	31.7117	33.8217	20.835	22.19	25.5233	32.7667	22.2158
415.909	20.3683	41.165	31.7933	33.8708	20.8967	22.2467	25.5983	32.8321	22.2775
416.113	20.43	41.2233	31.85	33.9175	20.9633	22.31	25.6717	32.8837	22.3438
416.317	20.4867	41.2767	31.9133	33.9667	21.0183	22.36	25.7333	32.94	22.3996
416.521	20.5533	41.3533	31.9917	34.0267	21.0767	22.435	25.8	33.0092	22.4662
416.726	20.635	41.445	32.0767	34.0983	21.1417	22.5083	25.8867	33.0875	22.5429
416.93	20.7017	41.4967	32.1483	34.1417	21.2067	22.5683	25.9567	33.145	22.6083
417.134	20.7817	41.585	32.2333	34.2067	21.275	22.645	26.04	33.22	22.6854
417.338	20.8533	41.65	32.3167	34.2667	21.34	22.7233	26.1283	33.2917	22.7612
417.542	20.8933	41.6967	32.3783	34.2933	21.3783	22.7817	26.1717	33.3358	22.8062
417.747	20.9667	41.7717	32.4467	34.34	21.4317	22.8383	26.2483	33.3933	22.8712
417.951	21.0333	41.8283	32.5267	34.3925	21.4933	22.905	26.3317	33.4596	22.9408
418.155	21.1117	41.89	32.5967	34.4542	21.555	22.9817	26.4017	33.5254	23.0125
418.359	21.1817	41.965	32.6767	34.5075	21.6183	23.0433	26.48	33.5921	23.0808
418.563	21.2583	42.025	32.75	34.5608	21.6783	23.1217	26.5667	33.6554	23.1562
418.767	21.345	42.1033	32.83	34.6308	21.7583	23.2067	26.68	33.7304	23.2475
418.971	21.4367	42.175	32.9183	34.7017	21.8417	23.3017	26.7983	33.81	23.3446
419.175	21.5233	42.2483	33	34.7675	21.9217	23.3883	26.9067	33.8837	23.435
419.379	21.615	42.3283	33.085	34.8458	22.0067	23.4867	27.005	33.9654	23.5283
419.584	21.6933	42.4	33.1633	34.8942	22.0833	23.5733	27.0983	34.0288	23.6121
419.788	21.7933	42.4933	33.2467	34.9667	22.18	23.6667	27.2033	34.1067	23.7108
419.992	21.8817	42.5617	33.3067	35.0225	22.275	23.7617	27.3133	34.1646	23.8079
420.196	21.9767	42.6383	33.3717	35.075	22.3533	23.855	27.4133	34.2233	23.8996
420.4	22.0617	42.715	33.445	35.1267	22.44	23.945	27.52	34.2858	23.9917
420.604	22.15	42.78	33.51	35.18	22.5217	24.0433	27.615	34.345	24.0825
420.808	22.2517	42.8567	33.5867	35.2517	22.6133	24.14	27.7217	34.4192	24.1817
421.012	22.3417	42.9183	33.655	35.2933	22.6933	24.225	27.8167	34.4742	24.2692
421.216	22.4267	42.9833	33.72	35.3233	22.78	24.3167	27.915	34.5217	24.3596
421.42	22.52	43.05	33.7883	35.3833	22.8683	24.4083	28.0167	34.5858	24.4533
421.624	22.615	43.1133	33.8683	35.4333	22.96	24.5067	28.1267	34.6508	24.5521
421.828	22.7233	43.185	33.9367	35.4917	23.0567	24.6117	28.2417	34.7142	24.6583
422.031	22.825	43.2367	34	35.5383	23.1367	24.71	28.3583	34.7692	24.7575
422.235	22.9283	43.2967	34.075	35.5917	23.2117	24.8	28.46	34.8333	24.85
422.439	23.02	43.3617	34.1483	35.6467	23.3	24.9033	28.565	34.8975	24.9471
422.643	23.1267	43.4283	34.22	35.7025	23.3783	24.9883	28.6683	34.9612	25.0404
422.847	23.2267	43.4933	34.2933	35.7567	23.4633	25.08	28.7767	35.025	25.1367
423.051	23.315	43.55	34.3483	35.7967	23.54	25.1633	28.855	35.0725	25.2183
423.255	23.4033	43.6133	34.4167	35.8525	23.6167	25.2417	28.9483	35.1346	25.3025
423.459	23.495	43.665	34.4733	35.9	23.6933	25.3217	29.0217	35.1867	25.3829
423.663	23.5767	43.725	34.5367	35.9458	23.7633	25.4067	29.1067	35.2413	25.4633
423.866	23.665	43.7767	34.59	35.9808	23.8317	25.485	29.1817	35.2854	25.5408
424.07	23.7467	43.83	34.6533	36.025	23.9017	25.56	29.2633	35.3392	25.6179
424.274	23.8333	43.8967	34.7233	36.0775	23.9783	25.6467	29.36	35.4004	25.7046
424.478	23.925	43.97	34.7933	36.1292	24.0617	25.7417	29.4633	35.4612	25.7979
424.682	24.02	44.0283	34.8633	36.1783	24.145	25.82	29.5683	35.5208	25.8883
424.885	24.11	44.085	34.9267	36.2242	24.2183	25.915	29.665	35.5754	25.9771
425.089	24.2017	44.1517	34.99	36.2717	24.3	26.0017	29.77	35.6308	26.0683
425.293	24.2883	44.2283	35.0717	36.3183	24.38	26.0933	29.8783	35.695	26.16
425.497	24.36	44.285	35.1417	36.3533	24.4533	26.1817	29.9683	35.7475	26.2408
425.7	24.4317	44.3483	35.2083	36.4075	24.5167	26.255	30.0617	35.8079	26.3163
425.904	24.5117	44.41	35.2683	36.445	24.5883	26.3217	30.1467	35.8567	26.3921
426.108	24.5783	44.4683	35.3367	36.5033	24.655	26.385	30.2317	35.92	26.4625
426.312	24.6367	44.5217	35.3917	36.5442	24.7083	26.4417	30.305	35.9679	26.5229
426.515	24.695	44.58	35.4467	36.58	24.765	26.5017	30.3617	36.0133	26.5808
426.719	24.7467	44.63	35.51	36.6292	24.8217	26.5583	30.4183	36.0696	26.6362
426.923	24.7967	44.6817	35.5617	36.6667	24.865	26.61	30.4733	36.1142	26.6863
427.126	24.8467	44.7367	35.615	36.7033	24.91	26.6583	30.5167	36.1592	26.7329
427.33	24.895	44.7967	35.6683	36.7458	24.9567	26.7083	30.565	36.2071	26.7812
427.534	24.9483	44.8433	35.7133	36.7975	25.0033	26.75	30.615	36.2554	26.8292
427.737	24.995	44.905	35.7617	36.8425	25.05	26.795	30.66	36.3021	26.875
427.941	25.0467	44.965	35.8183	36.8708	25.0883	26.8367	30.7033	36.3446	26.9188
428.145	25.0767	45.0083	35.8683	36.9225	25.1067	26.87	30.7433	36.3954	26.9492
428.348	25.1033	45.0683	35.9167	36.9575	25.135	26.905	30.78	36.4371	26.9808
428.552	25.1367	45.1233	35.98	37.0008	25.1683	26.9417	30.82	36.4904	27.0167
428.755	25.1633	45.1767	36.0317	37.0333	25.1867	26.9667	30.8483	36.5325	27.0413
428.959	25.2017	45.2217	36.0817	37.0683	25.2083	26.9867	30.8767	36.575	27.0683
429.162	25.2183	45.28	36.1433	37.115	25.2367	27.0117	30.8933	36.6292	27.09
429.366	25.2317	45.3267	36.2017	37.1658	25.2583	27.025	30.9167	36.6838	27.1079
429.57	25.235	45.3733	36.2583	37.1958	25.2617	27.0367	30.9217	36.7271	27.1138
429.773	25.2433	45.4133	36.3117	37.2225	25.2583	27.0417	30.935	36.7671	27.1196
429.977	25.2433	45.45	36.3583	37.2575	25.2517	27.0417	30.9367	36.8079	27.1183
430.18	25.225	45.49	36.4117	37.3033	25.2367	27.03	30.9317	36.8575	27.1058
430.384	25.2067	45.5233	36.4417	37.3142	25.215	27.0133	30.915	36.8779	27.0875
430.587	25.1967	45.5667	36.495	37.3425	25.2117	27.0217	30.9133	36.9188	27.0858
430.791	25.1717	45.605	36.5367	37.37	25.1933	27.0017	30.8917	36.9533	27.0646
430.994	25.1567	45.6383	36.5817	37.4058	25.1833	26.9817	30.885	36.9937	27.0517
431.197	25.13	45.6883	36.625	37.4242	25.155	26.9667	30.8583	37.0246	27.0275
431.401	25.1	45.7133	36.6417	37.4375	25.1167	26.9317	30.8433	37.0396	26.9979
431.604	25.0733	45.76	36.68	37.4442	25.0867	26.92	30.8217	37.0621	26.9754
431.808	25.045	45.7917	36.7133	37.4633	25.06	26.8867	30.8	37.0883	26.9479
432.011	25.01	45.8283	36.7583	37.485	25.0367	26.865	30.7717	37.1217	26.9208
432.215	24.9883	45.8667	36.8017	37.5125	25.0183	26.85	30.75	37.1571	26.9017
432.418	24.9533	45.9017	36.8217	37.5225	24.99	26.8217	30.7133	37.1721	26.8696
432.621	24.9083	45.9417	36.8617	37.5483	24.975	26.795	30.67	37.205	26.8371
432.825	24.8817	45.9817	36.9083	37.5833	24.9467	26.76	30.6317	37.2458	26.805
433.028	24.8367	46.0133	36.9217	37.6042	24.8917	26.715	30.5767	37.2629	26.755
433.231	24.785	46.05	36.9533	37.6292	24.8433	26.6683	30.5217	37.2912	26.7046
433.435	24.7333	46.08	36.9883	37.6458	24.8	26.6167	30.4733	37.3171	26.6558
433.638	24.6733	46.1117	37.0317	37.6767	24.76	26.5633	30.415	37.3542	26.6029
433.841	24.5983	46.1333	37.0433	37.6825	24.7	26.4883	30.3467	37.3629	26.5333
434.045	24.53	46.17	37.08	37.6975	24.6433	26.43	30.2933	37.3888	26.4742
434.248	24.4617	46.225	37.11	37.7208	24.5833	26.3683	30.24	37.4154	26.4133
434.451	24.3917	46.275	37.1583	37.7358	24.5283	26.3133	30.1917	37.4471	26.3562
434.655	24.3233	46.3033	37.195	37.75	24.4733	26.2567	30.13	37.4725	26.2958
434.858	24.2867	46.345	37.25	37.7717	24.4133	26.1967	30.0833	37.5108	26.245
435.061	24.2083	46.38	37.2783	37.7917	24.3483	26.1317	30.0167	37.535	26.1763
435.264	24.1583	46.4317	37.3317	37.8158	24.3083	26.09	29.97	37.5737	26.1317
435.468	24.0833	46.4767	37.3767	37.8317	24.2567	26.0283	29.91	37.6042	26.0696
435.671	24.0183	46.5117	37.4067	37.8592	24.1967	25.975	29.8517	37.6329	26.0104
435.874	23.96	46.555	37.4483	37.8817	24.1417	25.9333	29.785	37.665	25.955
436.077	23.9067	46.6017	37.5067	37.9208	24.09	25.8817	29.7317	37.7138	25.9025
436.28	23.8433	46.645	37.555	37.9533	24.035	25.8233	29.6633	37.7542	25.8412
436.483	23.78	46.685	37.6117	37.9942	23.98	25.7683	29.595	37.8029	25.7808
436.687	23.72	46.7283	37.655	38.0192	23.9167	25.705	29.5217	37.8371	25.7158
436.89	23.6483	46.79	37.7117	38.0583	23.855	25.6417	29.4483	37.885	25.6483
437.093	23.5667	46.8517	37.76	38.1025	23.8033	25.5783	29.3633	37.9312	25.5779
437.296	23.4933	46.9083	37.82	38.1342	23.735	25.5133	29.285	37.9771	25.5067
437.499	23.4133	46.9617	37.8867	38.1642	23.6617	25.4317	29.1983	38.0254	25.4262
437.702	23.3367	47.0133	37.95	38.2075	23.5967	25.365	29.1083	38.0787	25.3517
437.905	23.265	47.0817	38.0317	38.2483	23.5417	25.295	29.035	38.14	25.2842
438.108	23.185	47.15	38.0933	38.3025	23.4833	25.2083	28.955	38.1979	25.2079
438.312	23.0883	47.2283	38.17	38.3358	23.4067	25.1217	28.86	38.2529	25.1192
438.515	23.0017	47.3	38.24	38.3792	23.3267	25.0233	28.765	38.3096	25.0292
438.718	22.9283	47.3717	38.3067	38.4267	23.265	24.945	28.68	38.3667	24.9546
438.921	22.8283	47.4367	38.36	38.4858	23.1833	24.8517	28.5767	38.4229	24.86
439.124	22.7367	47.495	38.4217	38.5258	23.1017	24.76	28.49	38.4737	24.7721
439.327	22.645	47.5517	38.4883	38.5508	23.0233	24.6733	28.3983	38.5196	24.685
439.53	22.555	47.6283	38.5567	38.5942	22.9433	24.5767	28.2983	38.5754	24.5933
439.733	22.4567	47.7067	38.62	38.645	22.8583	24.4867	28.1983	38.6325	24.5
439.936	22.375	47.7867	38.6867	38.6908	22.7783	24.4017	28.115	38.6887	24.4175
440.139	22.275	47.8633	38.7517	38.7558	22.68	24.3	28.02	38.7537	24.3187
440.342	22.1733	47.9367	38.8233	38.7783	22.5683	24.1933	27.9083	38.8008	24.2108
440.545	22.075	48.0083	38.8917	38.8225	22.4817	24.0967	27.805	38.8571	24.1146
440.748	21.9783	48.0833	38.9517	38.865	22.39	24.0083	27.6933	38.9083	24.0175
440.951	21.8767	48.17	39.0383	38.9275	22.3033	23.9183	27.5933	38.9829	23.9229
441.153	21.78	48.2517	39.1167	38.9642	22.215	23.8233	27.505	39.0404	23.8308
441.356	21.695	48.3483	39.2	39.015	22.135	23.7383	27.4167	39.1075	23.7462
441.559	21.6117	48.435	39.2833	39.0825	22.0467	23.6483	27.3267	39.1829	23.6583
441.762	21.51	48.5183	39.3633	39.1308	21.9583	23.5567	27.23	39.2471	23.5638
441.965	21.42	48.5917	39.4417	39.1775	21.87	23.4633	27.1417	39.3096	23.4738
442.168	21.3333	48.6783	39.5133	39.2383	21.7833	23.3717	27.0433	39.3758	23.3829
442.371	21.2517	48.7717	39.5867	39.2725	21.71	23.2933	26.945	39.4296	23.3
442.574	21.1767	48.865	39.6767	39.3525	21.65	23.2233	26.8667	39.5146	23.2292
442.776	21.095	48.9483	39.7583	39.4233	21.5717	23.14	26.7783	39.5908	23.1462
442.979	21.0117	49.0417	39.8483	39.4875	21.5017	23.07	26.6983	39.6679	23.0704
443.182	20.935	49.1183	39.915	39.5333	21.4283	22.99	26.6183	39.7242	22.9929
443.385	20.85	49.1917	39.99	39.5917	21.3533	22.9133	26.5217	39.7908	22.9096
443.588	20.77	49.275	40.0733	39.6533	21.28	22.8383	26.4283	39.8633	22.8292
443.79	20.6833	49.3733	40.1633	39.7233	21.21	22.7633	26.3433	39.9433	22.75
443.993	20.6167	49.47	40.2583	39.8	21.145	22.6933	26.2667	40.0292	22.6804
444.196	20.525	49.575	40.3567	39.8733	21.07	22.615	26.1733	40.115	22.5958
444.399	20.415	49.665	40.4567	39.9233	20.985	22.515	26.06	40.19	22.4937
444.601	20.3283	49.7733	40.58	40.0042	20.905	22.43	25.9767	40.2921	22.41
444.804	20.225	49.8867	40.6817	40.0758	20.8067	22.3267	25.865	40.3787	22.3058
445.007	20.1267	50.0083	40.785	40.1442	20.7217	22.2317	25.75	40.4646	22.2075
445.21	20.035	50.125	40.9067	40.215	20.6217	22.135	25.6467	40.5608	22.1096
445.412	19.9267	50.255	41.03	40.28	20.5217	22.03	25.5367	40.655	22.0038
445.615	19.8367	50.3817	41.1517	40.3725	20.4233	21.9267	25.4367	40.7621	21.9058
445.818	19.74	50.4917	41.2583	40.4425	20.3367	21.8133	25.3283	40.8504	21.8046
446.02	19.6433	50.5967	41.3533	40.515	20.235	21.7133	25.22	40.9342	21.7029
446.223	19.5417	50.7067	41.45	40.5792	20.1333	21.62	25.105	41.0146	21.6
446.426	19.4367	50.835	41.555	40.6542	20.03	21.505	24.9817	41.1046	21.4883
446.628	19.345	50.9433	41.6533	40.7258	19.9433	21.4117	24.8917	41.1896	21.3979
446.831	19.2483	51.0383	41.7333	40.7808	19.8417	21.3117	24.7717	41.2571	21.2933
447.033	19.1567	51.1433	41.8283	40.8442	19.7567	21.2217	24.675	41.3362	21.2025
447.236	19.0517	51.2333	41.9333	40.9142	19.6517	21.12	24.57	41.4237	21.0983
447.439	18.9517	51.3183	42.0067	40.9717	19.56	21.0167	24.4667	41.4892	20.9988
447.641	18.8683	51.4083	42.0883	41.0408	19.4833	20.9267	24.3733	41.5646	20.9129
447.844	18.775	51.495	42.1683	41.0867	19.4017	20.8367	24.27	41.6275	20.8208
448.046	18.6833	51.5817	42.245	41.1433	19.3167	20.75	24.175	41.6942	20.7312
448.249	18.6017	51.6567	42.3217	41.1833	19.2433	20.6633	24.08	41.7525	20.6471
448.451	18.5183	51.74	42.41	41.2267	19.17	20.5767	23.9933	41.8183	20.5646
448.654	18.4367	51.8233	42.5	41.2883	19.095	20.5	23.9033	41.8942	20.4838
448.856	18.3717	51.9133	42.58	41.3467	19.0267	20.4317	23.8183	41.9633	20.4121
449.059	18.2867	51.9933	42.655	41.3958	18.955	20.3533	23.735	42.0254	20.3325
449.261	18.205	52.0717	42.7267	41.4433	18.8817	20.2733	23.6433	42.085	20.2508
449.464	18.1333	52.175	42.805	41.4917	18.8217	20.2033	23.555	42.1483	20.1783
449.666	18.0617	52.2683	42.8967	41.55	18.7633	20.1383	23.4717	42.2233	20.1088
449.869	17.9917	52.3667	42.9783	41.5992	18.69	20.0683	23.3817	42.2888	20.0329
450.071	17.9167	52.465	43.0783	41.6642	18.6183	19.9933	23.295	42.3713	19.9558
450.274	17.85	52.565	43.17	41.7267	18.5583	19.9167	23.2133	42.4483	19.8846
450.476	17.77	52.685	43.265	41.7883	18.4833	19.835	23.1217	42.5267	19.8025
450.678	17.685	52.7867	43.3583	41.8583	18.4067	19.7567	23.0317	42.6083	19.72
450.881	17.6	52.9	43.445	41.9233	18.3267	19.6633	22.9317	42.6842	19.6304
451.083	17.5117	52.9833	43.53	41.9725	18.245	19.5683	22.83	42.7512	19.5388
451.286	17.4333	53.0867	43.6317	42.0383	18.175	19.4883	22.7333	42.835	19.4575
451.488	17.355	53.19	43.7333	42.105	18.0983	19.3933	22.645	42.9192	19.3729
451.69	17.2683	53.2817	43.83	42.16	18.0067	19.3	22.5467	42.995	19.2804
451.893	17.185	53.3767	43.9217	42.2133	17.9217	19.205	22.4567	43.0675	19.1921
452.095	17.0933	53.4617	44	42.2642	17.84	19.12	22.3733	43.1321	19.1067
452.297	17.0167	53.5617	44.075	42.31	17.755	19.025	22.275	43.1925	19.0179
452.5	16.9183	53.6417	44.1567	42.3508	17.6633	18.9367	22.175	43.2537	18.9233
452.702	16.8333	53.7167	44.24	42.405	17.585	18.8417	22.0817	43.3225	18.8354
452.904	16.7367	53.7917	44.315	42.4492	17.4917	18.7417	21.9633	43.3821	18.7333
453.106	16.6483	53.88	44.395	42.4992	17.3967	18.6517	21.8567	43.4471	18.6383
453.309	16.5483	53.9817	44.4767	42.5475	17.295	18.5483	21.755	43.5121	18.5367
453.511	16.4517	54.0683	44.5483	42.585	17.2	18.4533	21.6433	43.5667	18.4371
453.713	16.365	54.1517	44.615	42.6275	17.1133	18.3617	21.5483	43.6213	18.3471
453.915	16.275	54.2367	44.6917	42.6667	17.0417	18.2717	21.4567	43.6792	18.2613
454.118	16.185	54.3067	44.7533	42.7125	16.9617	18.19	21.3617	43.7329	18.1746
454.32	16.115	54.3733	44.81	42.7533	16.8817	18.0983	21.2633	43.7817	18.0896
454.522	16.0317	54.43	44.86	42.7725	16.805	18.0217	21.1733	43.8162	18.0079
454.724	15.9533	54.5017	44.9183	42.8067	16.7283	17.94	21.09	43.8625	17.9279
454.926	15.8817	54.5567	44.9633	42.8383	16.655	17.8683	21.0017	43.9008	17.8517
455.128	15.8167	54.6367	45.025	42.8867	16.5833	17.795	20.9267	43.9558	17.7804
455.331	15.7333	54.7083	45.0783	42.9142	16.515	17.7133	20.845	43.9963	17.7017
455.533	15.6467	54.7683	45.14	42.9508	16.44	17.635	20.7483	44.0454	17.6175
455.735	15.575	54.84	45.1917	42.9883	16.3683	17.5517	20.6683	44.09	17.5408
455.937	15.49	54.8983	45.2417	43.0225	16.2883	17.4717	20.5717	44.1321	17.4554
456.139	15.405	54.9533	45.2867	43.0675	16.2083	17.3883	20.4867	44.1771	17.3721
456.341	15.3283	54.995	45.315	43.0825	16.1267	17.3033	20.3883	44.1988	17.2867
456.543	15.2367	55.0533	45.38	43.1058	16.05	17.2283	20.2983	44.2429	17.2033
456.745	15.155	55.11	45.43	43.145	15.97	17.15	20.2067	44.2875	17.1204
456.947	15.0867	55.18	45.4867	43.1992	15.905	17.075	20.1233	44.3429	17.0475
457.149	15.0033	55.2317	45.525	43.2083	15.8167	16.9867	20.0217	44.3667	16.9571
457.352	14.925	55.2633	45.55	43.2175	15.7483	16.905	19.93	44.3837	16.8771
457.554	14.8583	55.3233	45.5983	43.2383	15.675	16.825	19.85	44.4183	16.8021
457.756	14.7833	55.3767	45.6467	43.265	15.6	16.7433	19.775	44.4558	16.7254
457.958	14.7167	55.4183	45.7	43.3017	15.5333	16.67	19.6817	44.5008	16.6504
458.16	14.64	55.455	45.7283	43.33	15.465	16.6	19.6017	44.5292	16.5767
458.362	14.5683	55.485	45.755	43.3333	15.3933	16.5133	19.5083	44.5442	16.4958
458.563	14.5	55.5417	45.795	43.3617	15.33	16.4433	19.4317	44.5783	16.4262
458.765	14.4217	55.5633	45.8083	43.3583	15.26	16.355	19.335	44.5833	16.3429
458.967	14.3483	55.61	45.8333	43.3633	15.1967	16.2767	19.2583	44.5983	16.27
459.169	14.2633	55.6283	45.8467	43.3617	15.1167	16.19	19.16	44.6042	16.1825
459.371	14.1683	55.6733	45.87	43.3792	15.035	16.1067	19.0683	44.6246	16.0946
459.573	14.08	55.7	45.8917	43.3883	14.945	16.0117	18.9717	44.64	16.0021
459.775	13.9867	55.7	45.8883	43.3858	14.855	15.9233	18.855	44.6371	15.905
459.977	13.8967	55.7067	45.8783	43.3875	14.7767	15.8317	18.75	44.6329	15.8138
460.179	13.7967	55.7	45.865	43.355	14.675	15.7267	18.6367	44.61	15.7088
460.381	13.7033	55.71	45.8767	43.3475	14.58	15.63	18.5167	44.6121	15.6075
460.583	13.6133	55.7267	45.8783	43.3358	14.4867	15.5367	18.41	44.6071	15.5117
460.784	13.5167	55.7267	45.88	43.3183	14.39	15.4367	18.3	44.5992	15.4108
460.986	13.4367	55.7283	45.8633	43.305	14.305	15.3533	18.21	44.5842	15.3262
461.188	13.3717	55.7317	45.8717	43.3042	14.2333	15.275	18.1183	44.5879	15.2496
461.39	13.305	55.73	45.8617	43.2917	14.1683	15.21	18.0467	44.5767	15.1825
461.592	13.2533	55.73	45.8567	43.28	14.11	15.1383	17.9767	44.5683	15.1196
461.793	13.1967	55.735	45.8517	43.2642	14.0517	15.085	17.9067	44.5579	15.06
461.995	13.1533	55.7433	45.855	43.2558	14.0067	15.0333	17.85	44.5554	15.0108
462.197	13.11	55.7567	45.8567	43.2492	13.9567	14.9783	17.7883	44.5529	14.9583
462.399	13.0617	55.77	45.8567	43.2508	13.9017	14.925	17.73	44.5538	14.9046
462.601	13.0117	55.7767	45.85	43.2392	13.85	14.8717	17.675	44.5446	14.8521
462.802	12.9583	55.7683	45.845	43.2292	13.8033	14.815	17.6117	44.5371	14.7971
463.004	12.925	55.775	45.835	43.2325	13.7583	14.77	17.5583	44.5337	14.7529
463.206	12.8733	55.7917	45.8417	43.2233	13.7017	14.715	17.49	44.5325	14.695
463.407	12.8067	55.7817	45.8217	43.2075	13.6333	14.6483	17.4233	44.5146	14.6279
463.609	12.7417	55.7833	45.8183	43.1775	13.5617	14.5817	17.3367	44.4979	14.5554
463.811	12.6617	55.76	45.7933	43.1517	13.4933	14.5117	17.255	44.4725	14.4804
464.012	12.6033	55.745	45.7867	43.135	13.4267	14.4333	17.1767	44.4608	14.41
464.214	12.525	55.7333	45.7683	43.1233	13.3583	14.3617	17.085	44.4458	14.3325
464.416	12.4433	55.6967	45.74	43.08	13.285	14.2817	16.9933	44.41	14.2508
464.617	12.38	55.685	45.725	43.0633	13.2217	14.21	16.925	44.3942	14.1842
464.819	12.3283	55.6633	45.6883	43.0317	13.1583	14.14	16.8433	44.36	14.1175
465.021	12.2633	55.6417	45.665	43.005	13.0967	14.0683	16.7633	44.335	14.0479
465.222	12.1767	55.615	45.625	42.9517	13.025	13.98	16.6717	44.2883	13.9633
465.424	12.1083	55.5783	45.59	42.9208	12.9667	13.9133	16.595	44.2554	13.8958
465.625	12.0483	55.5483	45.5617	42.8917	12.92	13.8383	16.515	44.2267	13.8304
465.827	11.9767	55.53	45.5133	42.8633	12.8617	13.765	16.4333	44.1883	13.7592
466.028	11.9233	55.4983	45.485	42.8458	12.8	13.695	16.3517	44.1654	13.6925
466.23	11.855	55.4683	45.4517	42.79	12.7233	13.625	16.27	44.1208	13.6183
466.432	11.7883	55.4233	45.395	42.7358	12.6467	13.5433	16.1833	44.0654	13.5404
466.633	11.735	55.3933	45.3483	42.6967	12.585	13.4767	16.1083	44.0225	13.4763
466.835	11.6517	55.355	45.2967	42.6358	12.51	13.3967	16.005	43.9663	13.3908
467.036	11.5867	55.325	45.26	42.6033	12.45	13.335	15.9367	43.9317	13.3271
467.238	11.5167	55.2767	45.21	42.565	12.3767	13.265	15.8567	43.8875	13.2538
467.439	11.4533	55.2417	45.16	42.5208	12.3	13.19	15.7667	43.8404	13.1775
467.641	11.3833	55.1933	45.1	42.47	12.215	13.11	15.6733	43.785	13.0954
467.842	11.3083	55.165	45.05	42.4292	12.1333	13.03	15.5817	43.7396	13.0133
468.043	11.2467	55.12	45.005	42.3825	12.07	12.9683	15.505	43.6938	12.9475
468.245	11.18	55.0817	44.9417	42.3242	11.9933	12.9	15.4217	43.6329	12.8737
468.446	11.115	55.035	44.87	42.2892	11.9317	12.8283	15.35	43.5796	12.8063
468.648	11.055	55.0117	44.8383	42.2492	11.8717	12.7633	15.28	43.5438	12.7425
468.849	10.9983	54.985	44.7983	42.22	11.8167	12.705	15.2183	43.5092	12.6846
469.05	10.9367	54.9283	44.75	42.175	11.7633	12.6383	15.1483	43.4625	12.6217
469.252	10.8917	54.885	44.6933	42.1075	11.6983	12.5667	15.0767	43.4004	12.5583
469.453	10.8383	54.855	44.64	42.0717	11.6533	12.5083	15.015	43.3558	12.5037
469.655	10.7967	54.8067	44.5967	42.0367	11.6133	12.4633	14.9583	43.3167	12.4579
469.856	10.735	54.7667	44.555	41.9858	11.5617	12.4033	14.8833	43.2704	12.3958
470.057	10.68	54.6967	44.4833	41.9233	11.51	12.345	14.8183	43.2033	12.3383
470.259	10.63	54.6333	44.4217	41.8758	11.455	12.2767	14.7483	43.1487	12.2775
470.46	10.58	54.585	44.38	41.8408	11.4083	12.225	14.6867	43.1104	12.225
470.661	10.5183	54.5433	44.3217	41.7942	11.3483	12.16	14.6067	43.0579	12.1583
470.862	10.46	54.4783	44.2567	41.7525	11.3017	12.1017	14.5383	43.0046	12.1004
471.064	10.39	54.4067	44.185	41.6908	11.2283	12.0283	14.4517	42.9379	12.0246
471.265	10.3483	54.36	44.135	41.6542	11.18	11.98	14.39	42.8946	11.9746
471.466	10.29	54.3133	44.085	41.6167	11.1317	11.93	14.32	42.8508	11.9179
471.667	10.2183	54.25	44.01	41.5558	11.0533	11.8617	14.235	42.7829	11.8421
471.869	10.16	54.1967	43.9467	41.5217	10.9967	11.7967	14.1633	42.7342	11.7792
472.07	10.1083	54.15	43.895	41.48	10.9433	11.7367	14.0983	42.6875	11.7217
472.271	10.0533	54.095	43.8317	41.4433	10.8767	11.6633	14.025	42.6375	11.6546
472.472	9.995	54.05	43.7683	41.3908	10.825	11.6	13.9617	42.5796	11.5954
472.673	9.93333	53.99	43.6983	41.3333	10.765	11.53	13.8833	42.5158	11.5279
472.875	9.88	53.9267	43.6267	41.2708	10.7117	11.4683	13.8067	42.4488	11.4667
473.076	9.81333	53.8533	43.53	41.1917	10.645	11.3933	13.73	42.3608	11.3954
473.277	9.76167	53.79	43.4533	41.1267	10.595	11.3383	13.6633	42.29	11.3396
473.478	9.7	53.7183	43.3633	41.0667	10.525	11.2783	13.58	42.215	11.2708
473.679	9.625	53.645	43.27	40.9983	10.455	11.2017	13.505	42.1342	11.1967
473.88	9.58833	53.5883	43.2083	40.9333	10.4083	11.1467	13.4483	42.0708	11.1479
474.081	9.53167	53.515	43.1183	40.85	10.3433	11.085	13.3667	41.9842	11.0817
474.282	9.47833	53.4317	43.0217	40.7833	10.2833	11.02	13.3017	41.9025	11.0208
474.484	9.43	53.3767	42.9583	40.7317	10.2283	10.9733	13.2367	41.845	10.9671
474.685	9.35167	53.295	42.875	40.6725	10.1567	10.8983	13.1533	41.7737	10.89
474.886	9.30333	53.23	42.8033	40.615	10.0967	10.8417	13.0933	41.7092	10.8338
475.087	9.25167	53.15	42.735	40.5767	10.0483	10.785	13.0417	41.6558	10.7817
475.288	9.20667	53.0933	42.675	40.5408	9.99167	10.7267	12.98	41.6079	10.7263
475.489	9.14333	53.0233	42.5967	40.4833	9.92	10.6617	12.9	41.54	10.6563
475.69	9.08333	52.9617	42.53	40.4292	9.86667	10.5933	12.8267	41.4796	10.5925
475.891	9.03833	52.8983	42.455	40.3817	9.81	10.525	12.7567	41.4183	10.5325
476.092	8.97	52.8217	42.375	40.3192	9.74833	10.4567	12.68	41.3471	10.4638
476.293	8.915	52.7583	42.315	40.2683	9.69667	10.395	12.6217	41.2917	10.4071
476.494	8.86167	52.705	42.2383	40.2175	9.64667	10.3367	12.5533	41.2279	10.3496
476.695	8.805	52.6283	42.15	40.1433	9.595	10.275	12.4867	41.1467	10.2904
476.896	8.75833	52.545	42.0667	40.0883	9.54167	10.2267	12.4167	41.0775	10.2358
477.096	8.70333	52.465	41.9817	40.0208	9.48667	10.1717	12.345	41.0012	10.1767
477.297	8.655	52.3917	41.8967	39.9542	9.43833	10.1117	12.2767	40.9254	10.1204
477.498	8.60167	52.2983	41.8067	39.8967	9.38333	10.05	12.205	40.8517	10.06
477.699	8.57	52.2233	41.7367	39.8458	9.34667	10.0017	12.15	40.7912	10.0171
477.9	8.52667	52.14	41.655	39.7783	9.3	9.94833	12.09	40.7167	9.96625
478.101	8.49333	52.06	41.5717	39.725	9.25833	9.91	12.0417	40.6483	9.92583
478.302	8.46167	51.9867	41.4967	39.6842	9.21667	9.86667	11.9833	40.5904	9.88208
478.503	8.40833	51.8917	41.4	39.6267	9.15	9.805	11.9067	40.5133	9.8175
478.703	8.36333	51.8067	41.3217	39.5692	9.105	9.755	11.8467	40.4454	9.7675
478.904	8.30833	51.7167	41.24	39.5067	9.04667	9.69833	11.7767	40.3733	9.7075
479.105	8.275	51.64	41.1617	39.4442	9.01167	9.65833	11.7233	40.3029	9.66708
479.306	8.24	51.5733	41.085	39.3858	8.97	9.60333	11.6683	40.2354	9.62042
479.507	8.195	51.5117	41.0167	39.3275	8.91833	9.56	11.6167	40.1721	9.5725
479.707	8.15667	51.4567	40.94	39.2592	8.87667	9.51	11.5583	40.0996	9.52542
479.908	8.11	51.3833	40.8567	39.185	8.83167	9.46833	11.5017	40.0208	9.47792
480.109	8.075	51.3233	40.7917	39.1475	8.78667	9.42667	11.455	39.9696	9.43583
480.31	8.01667	51.2533	40.7167	39.0808	8.72833	9.365	11.3817	39.8987	9.37292
480.51	7.97167	51.1933	40.63	39.025	8.68667	9.32333	11.3283	39.8275	9.3275
480.711	7.935	51.1183	40.5483	38.9683	8.65167	9.28	11.28	39.7583	9.28667
480.912	7.89667	51.0433	40.4733	38.905	8.60667	9.23167	11.2183	39.6892	9.23833
481.113	7.85167	50.9683	40.3917	38.8567	8.55833	9.18333	11.16	39.6242	9.18833
481.313	7.81667	50.9117	40.3217	38.8083	8.51333	9.13667	11.1083	39.565	9.14375
481.514	7.77667	50.8317	40.2333	38.755	8.47167	9.09333	11.0533	39.4942	9.09875
481.715	7.73333	50.74	40.14	38.6917	8.42333	9.055	10.9983	39.4158	9.0525
481.915	7.68167	50.6383	40.0517	38.63	8.36167	9.00333	10.94	39.3408	8.99667
482.116	7.64667	50.5483	39.965	38.5792	8.32	8.95167	10.8867	39.2721	8.95125
482.317	7.60167	50.4533	39.8517	38.5108	8.275	8.90167	10.83	39.1812	8.90208
482.517	7.56333	50.3617	39.765	38.45	8.24833	8.86667	10.7833	39.1075	8.86542
482.718	7.52333	50.2633	39.6733	38.3783	8.20167	8.80667	10.7267	39.0258	8.81458
482.918	7.48167	50.185	39.5967	38.3175	8.16	8.75833	10.67	38.9571	8.7675
483.119	7.43333	50.0983	39.4967	38.2458	8.115	8.71333	10.6183	38.8713	8.72
483.319	7.38667	50.0117	39.4	38.1633	8.06667	8.66	10.5617	38.7817	8.66875
483.52	7.34167	49.91	39.2867	38.0775	8.01333	8.60667	10.4983	38.6821	8.615
483.721	7.28833	49.805	39.1683	37.9867	7.96167	8.54667	10.4283	38.5775	8.55625
483.921	7.23	49.71	39.055	37.9017	7.89833	8.48167	10.3483	38.4783	8.48958
484.122	7.175	49.6183	38.9483	37.8217	7.84667	8.41833	10.2767	38.385	8.42917
484.322	7.12333	49.5783	38.8833	37.7767	7.8	8.36333	10.2117	38.33	8.37458
484.523	7.07667	49.5717	38.85	37.7592	7.755	8.31833	10.1583	38.3046	8.32708
484.723	7.045	49.5967	38.8533	37.7792	7.72167	8.28167	10.1217	38.3162	8.2925
484.924	7.01667	49.6	38.8417	37.7867	7.69333	8.25333	10.085	38.3142	8.26208
485.124	6.995	49.6	38.835	37.7967	7.67167	8.23	10.0483	38.3158	8.23625
485.325	6.97833	49.58	38.8083	37.79	7.64833	8.20333	10.0167	38.2992	8.21167
485.525	6.965	49.5483	38.7783	37.7708	7.63333	8.18333	9.99	38.2746	8.19292
485.725	6.94333	49.5083	38.7417	37.74	7.61333	8.16	9.96167	38.2408	8.16958
485.926	6.93	49.4683	38.7067	37.7192	7.59667	8.13667	9.93667	38.2129	8.15
486.126	6.915	49.435	38.6767	37.7	7.58667	8.12167	9.91833	38.1883	8.13542
486.327	6.905	49.4	38.6467	37.6758	7.57167	8.11	9.89333	38.1613	8.12
486.527	6.89167	49.335	38.5917	37.6383	7.55	8.08667	9.86667	38.115	8.09875
486.727	6.87333	49.24	38.515	37.5733	7.52667	8.06333	9.835	38.0442	8.07458
486.928	6.84333	49.1083	38.3967	37.4625	7.49333	8.02333	9.785	37.9296	8.03625
487.128	6.81	48.965	38.2667	37.3525	7.45667	7.985	9.74	37.8096	7.99792
487.328	6.77	48.7917	38.1017	37.2017	7.41333	7.93667	9.68333	37.6517	7.95083
487.529	6.72167	48.6267	37.9433	37.06	7.365	7.885	9.62333	37.5017	7.89875
487.729	6.665	48.4633	37.79	36.9333	7.31	7.83333	9.55167	37.3617	7.84
487.929	6.61833	48.315	37.6467	36.8225	7.25833	7.78333	9.49167	37.2346	7.78792
488.13	6.55833	48.1767	37.5083	36.7008	7.19833	7.72167	9.41667	37.1046	7.72375
488.33	6.51333	48.0667	37.39	36.6017	7.15667	7.66833	9.35667	36.9958	7.67375
488.53	6.46667	47.96	37.2833	36.5225	7.11333	7.62167	9.305	36.9029	7.62667
488.73	6.425	47.875	37.195	36.44	7.06833	7.57833	9.255	36.8175	7.58167
488.931	6.39333	47.7967	37.11	36.3783	7.03667	7.54333	9.21333	36.7442	7.54667
489.131	6.36667	47.72	37.0317	36.33	7.01333	7.51167	9.17667	36.6808	7.51708
489.331	6.34333	47.65	36.9633	36.2717	6.985	7.48167	9.13667	36.6175	7.48667
489.531	6.31833	47.59	36.9	36.23	6.95833	7.45333	9.10167	36.565	7.45792
489.732	6.29667	47.5267	36.8417	36.1808	6.94333	7.43167	9.07333	36.5113	7.43625
489.932	6.28167	47.4767	36.78	36.1267	6.92333	7.405	9.05	36.4533	7.415
490.132	6.25833	47.4167	36.715	36.07	6.89667	7.38	9.02167	36.3925	7.38917
490.332	6.24667	47.3667	36.6617	36.0283	6.88	7.365	9.00167	36.345	7.37333
490.532	6.22167	47.2833	36.585	35.9608	6.85333	7.33667	8.96333	36.2729	7.34375
490.732	6.20167	47.1983	36.51	35.8892	6.83	7.30833	8.93333	36.1996	7.31833
490.933	6.19	47.1017	36.4217	35.8192	6.815	7.28333	8.90333	36.1204	7.29792
491.133	6.16	47.005	36.3317	35.7325	6.78833	7.255	8.86333	36.0321	7.26667
491.333	6.135	46.9017	36.24	35.6483	6.75833	7.22333	8.82333	35.9442	7.235
491.533	6.10167	46.7867	36.1333	35.5517	6.72333	7.18167	8.77667	35.8425	7.19583
491.733	6.065	46.66	36.0133	35.4425	6.68333	7.14	8.725	35.7279	7.15333
491.933	6.03	46.5233	35.885	35.3275	6.63167	7.095	8.66833	35.6063	7.10625
492.133	5.99	46.3783	35.7533	35.2192	6.58333	7.04333	8.605	35.4862	7.05542
492.333	5.94667	46.255	35.6317	35.1167	6.53833	6.99333	8.54333	35.3742	7.00542
492.533	5.90167	46.1383	35.5133	35.0158	6.49333	6.94	8.48167	35.2646	6.95417
492.733	5.86833	46.0533	35.4183	34.9367	6.45333	6.90167	8.435	35.1775	6.91458
492.933	5.83667	45.9767	35.3383	34.8658	6.42	6.86667	8.39167	35.1021	6.87875
493.133	5.81167	45.9083	35.2633	34.8058	6.39	6.83333	8.35833	35.0346	6.84833
493.333	5.79	45.8433	35.2	34.7533	6.36667	6.81167	8.325	34.9767	6.82333
493.533	5.76833	45.7767	35.1317	34.6983	6.345	6.78333	8.29833	34.915	6.79875
493.733	5.75667	45.7217	35.0817	34.65	6.325	6.765	8.275	34.8658	6.78042
493.933	5.74667	45.6717	35.0317	34.6125	6.31333	6.755	8.255	34.8221	6.7675
494.133	5.73	45.62	34.9767	34.5625	6.30167	6.73667	8.23333	34.7696	6.75042
494.333	5.70833	45.5717	34.9183	34.5192	6.28	6.71667	8.20833	34.7188	6.72833
494.533	5.69333	45.5083	34.8633	34.465	6.26667	6.70167	8.18667	34.6642	6.71208
494.733	5.68	45.4367	34.795	34.4033	6.25667	6.685	8.16333	34.5992	6.69625
494.933	5.66333	45.3533	34.725	34.335	6.23667	6.66667	8.14333	34.53	6.6775
495.133	5.64667	45.265	34.6367	34.2617	6.22167	6.64667	8.11	34.4492	6.65625
495.332	5.63667	45.1683	34.555	34.1892	6.20667	6.62833	8.085	34.3721	6.63917
495.532	5.60833	45.075	34.46	34.1017	6.17167	6.595	8.05	34.2808	6.60625
495.732	5.58167	44.975	34.375	34.0092	6.15	6.575	8.01667	34.1921	6.58083
495.932	5.55667	44.8717	34.275	33.925	6.125	6.54167	7.97667	34.1	6.55
496.132	5.52333	44.7517	34.17	33.8225	6.095	6.5	7.92667	33.9963	6.51125
496.332	5.49167	44.6433	34.0717	33.7183	6.06167	6.46167	7.88167	33.895	6.47417
496.531	5.465	44.5233	33.9717	33.6208	6.02833	6.425	7.835	33.7963	6.43833
496.731	5.43833	44.41	33.87	33.5317	6	6.38833	7.795	33.7008	6.40542
496.931	5.42167	44.315	33.7783	33.4392	5.97167	6.365	7.765	33.6088	6.38083
497.131	5.39667	44.215	33.6733	33.3633	5.95	6.33167	7.72667	33.5183	6.35125
497.33	5.36833	44.12	33.5767	33.2725	5.92	6.29833	7.68833	33.4246	6.31875
497.53	5.32167	44.01	33.4617	33.165	5.87167	6.24833	7.63333	33.3133	6.26875
497.73	5.29167	43.905	33.3717	33.075	5.85	6.215	7.59333	33.2233	6.2375
497.93	5.26667	43.8033	33.275	32.9925	5.815	6.17833	7.55333	33.1337	6.20333
498.129	5.25	43.7167	33.1767	32.915	5.79333	6.15833	7.52333	33.0458	6.18125
498.329	5.21833	43.6317	33.0833	32.8292	5.75833	6.12333	7.48333	32.9562	6.14583
498.529	5.20333	43.5567	33.0083	32.76	5.73667	6.10167	7.45667	32.8842	6.12458
498.728	5.18667	43.4883	32.9333	32.6967	5.71667	6.08333	7.43	32.815	6.10417
498.928	5.165	43.4083	32.85	32.6192	5.695	6.06	7.39833	32.7346	6.07958
499.128	5.14333	43.315	32.7717	32.5433	5.665	6.03333	7.36167	32.6575	6.05083
499.327	5.12167	43.2233	32.6983	32.4617	5.63833	6.005	7.33167	32.58	6.02417
499.527	5.105	43.1383	32.62	32.39	5.625	5.98833	7.30667	32.505	6.00625
499.727	5.095	43.0583	32.5483	32.3267	5.61167	5.975	7.28	32.4375	5.99042
499.926	5.07667	42.9783	32.4683	32.255	5.58667	5.955	7.24667	32.3617	5.96625
500.126	5.05333	42.9067	32.3867	32.175	5.57	5.93333	7.21833	32.2808	5.94375
500.325	5.03167	42.8267	32.3183	32.0983	5.54167	5.90167	7.18333	32.2083	5.91458
500.525	5.02	42.745	32.26	32.0317	5.525	5.88167	7.15833	32.1458	5.89625
500.724	4.99333	42.6533	32.1833	31.9567	5.5	5.85333	7.12333	32.07	5.8675
500.924	4.97	42.5633	32.1033	31.8717	5.47667	5.82833	7.09333	31.9875	5.84208
501.123	4.95833	42.465	32.0233	31.7842	5.45333	5.80167	7.05333	31.9038	5.81667
501.323	4.94	42.39	31.945	31.7258	5.43833	5.77833	7.03167	31.8354	5.79708
501.523	4.92833	42.2967	31.8567	31.6392	5.41333	5.75333	7.00167	31.7479	5.77417
501.722	4.90333	42.195	31.7817	31.5608	5.38667	5.72333	6.96667	31.6713	5.745
501.921	4.87833	42.11	31.6933	31.47	5.35333	5.69	6.93	31.5817	5.71292
502.121	4.86833	42.0183	31.6183	31.3925	5.335	5.67333	6.91	31.5054	5.69667
502.32	4.85167	41.915	31.5383	31.2992	5.315	5.64833	6.87333	31.4188	5.67208
502.52	4.83167	41.8083	31.4417	31.2175	5.29	5.62667	6.84667	31.3296	5.64875
502.719	4.81167	41.7183	31.345	31.1317	5.27	5.59833	6.81167	31.2383	5.62292
502.919	4.80167	41.6233	31.2583	31.055	5.25667	5.57333	6.78167	31.1567	5.60333
503.118	4.775	41.5267	31.1633	30.9675	5.23	5.53833	6.74333	31.0654	5.57167
503.318	4.745	41.445	31.0767	30.8808	5.20333	5.5	6.71167	30.9788	5.54
503.517	4.72667	41.3583	30.99	30.7792	5.18	5.47667	6.67667	30.8846	5.515
503.716	4.7	41.2733	30.9033	30.7017	5.15333	5.44667	6.63833	30.8025	5.48458
503.916	4.68833	41.1917	30.8167	30.6058	5.13	5.425	6.60333	30.7112	5.46167
504.115	4.67167	41.1	30.7283	30.515	5.11333	5.40167	6.57833	30.6217	5.44125
504.314	4.65333	41.0067	30.6317	30.4392	5.09667	5.37833	6.55833	30.5354	5.42167
504.514	4.63	40.9267	30.535	30.3583	5.06667	5.345	6.52667	30.4467	5.39208
504.713	4.60667	40.8333	30.4483	30.27	5.04333	5.31167	6.48333	30.3592	5.36125
504.912	4.58333	40.7233	30.355	30.1817	5.00667	5.28333	6.44667	30.2683	5.33
505.112	4.565	40.625	30.2717	30.1067	4.97833	5.265	6.41167	30.1892	5.305
505.311	4.55167	40.54	30.19	30.0392	4.96333	5.245	6.38667	30.1146	5.28667
505.51	4.53833	40.455	30.1183	29.9658	4.95333	5.235	6.36667	30.0421	5.27333
505.709	4.51667	40.3583	30.035	29.8883	4.92833	5.205	6.335	29.9617	5.24625
505.909	4.50167	40.265	29.9583	29.8225	4.91167	5.18333	6.31	29.8904	5.22667
506.108	4.475	40.18	29.88	29.7533	4.89	5.15667	6.28167	29.8167	5.20083
506.307	4.455	40.0933	29.805	29.6733	4.86833	5.14	6.25333	29.7392	5.17917
506.506	4.43833	40.0017	29.73	29.59	4.84667	5.11167	6.21833	29.66	5.15375
506.705	4.42	39.9183	29.6517	29.5283	4.83	5.09833	6.19333	29.59	5.13542
506.905	4.40167	39.8267	29.5683	29.445	4.80833	5.075	6.16	29.5067	5.11125
507.104	4.38333	39.7517	29.4933	29.3617	4.79833	5.05167	6.14167	29.4275	5.09375
507.303	4.36167	39.6633	29.4017	29.265	4.77667	5.03167	6.11833	29.3333	5.07208
507.502	4.34667	39.5683	29.3283	29.18	4.755	5.01333	6.09	29.2542	5.05125
507.701	4.33167	39.4833	29.2467	29.12	4.73833	5.005	6.06833	29.1833	5.03583
507.9	4.31833	39.3983	29.1517	29.0483	4.72333	4.985	6.03667	29.1	5.01583
508.099	4.29667	39.3	29.055	28.9433	4.7	4.96667	6.00333	28.9992	4.99167
508.299	4.27833	39.1917	28.955	28.8533	4.66667	4.93833	5.965	28.9042	4.96208
508.498	4.27	39.1067	28.87	28.7767	4.645	4.92	5.94167	28.8233	4.94417
508.697	4.24833	39.0083	28.7833	28.6925	4.62333	4.90333	5.91667	28.7379	4.92292
508.896	4.235	38.915	28.6983	28.5925	4.60833	4.88167	5.89667	28.6454	4.90542
509.095	4.22167	38.8233	28.605	28.4975	4.58833	4.86	5.86333	28.5512	4.88333
509.294	4.21333	38.73	28.5267	28.425	4.57333	4.84833	5.84667	28.4758	4.87042
509.493	4.20833	38.6467	28.4433	28.3583	4.57333	4.84667	5.83167	28.4008	4.865
509.692	4.2	38.5617	28.355	28.2867	4.565	4.83667	5.81167	28.3208	4.85333
509.891	4.18833	38.4733	28.265	28.1875	4.53667	4.80667	5.78	28.2263	4.82792
510.09	4.18667	38.385	28.1933	28.0992	4.525	4.79333	5.765	28.1463	4.8175
510.289	4.16833	38.2967	28.1167	28.0167	4.50333	4.775	5.735	28.0667	4.79542
510.488	4.14833	38.21	28.0367	27.9383	4.48333	4.76333	5.71333	27.9875	4.77708
510.687	4.13167	38.12	27.9583	27.855	4.47167	4.73667	5.68167	27.9067	4.75542
510.886	4.11833	38.0417	27.8833	27.7642	4.44833	4.715	5.65	27.8238	4.73292
511.085	4.10667	37.965	27.81	27.7158	4.43167	4.695	5.62667	27.7629	4.715
511.284	4.09667	37.8767	27.73	27.6383	4.41833	4.68167	5.61833	27.6842	4.70375
511.483	4.08	37.8017	27.655	27.5542	4.40167	4.66333	5.59167	27.6046	4.68417
511.681	4.06667	37.7133	27.58	27.47	4.38333	4.645	5.565	27.525	4.665
511.88	4.03833	37.6367	27.505	27.385	4.35833	4.61	5.53833	27.445	4.63625
512.079	4.02333	37.5433	27.43	27.3033	4.34	4.59333	5.515	27.3667	4.61792
512.278	4.00167	37.4583	27.3367	27.2183	4.31667	4.57667	5.495	27.2775	4.5975
512.477	3.98333	37.37	27.2567	27.1475	4.30667	4.555	5.47	27.2021	4.57875
512.676	3.98333	37.295	27.18	27.065	4.30333	4.54167	5.45833	27.1225	4.57167
512.875	3.975	37.2033	27.11	26.9875	4.29667	4.52333	5.44667	27.0487	4.56042
513.073	3.965	37.11	27.0233	26.91	4.28	4.50667	5.42667	26.9667	4.54458
513.272	3.95667	37.0217	26.9467	26.8092	4.27333	4.49333	5.41333	26.8779	4.53417
513.471	3.94833	36.95	26.8833	26.7467	4.26667	4.48667	5.40167	26.815	4.52583
513.67	3.93667	36.845	26.805	26.6708	4.24833	4.465	5.38333	26.7379	4.50833
513.868	3.91167	36.755	26.7283	26.5917	4.22167	4.43667	5.35333	26.66	4.48083
514.067	3.905	36.655	26.655	26.5167	4.21	4.42	5.335	26.5858	4.4675
514.266	3.89	36.5667	26.57	26.4458	4.20667	4.405	5.31667	26.5079	4.45458
514.465	3.885	36.49	26.5217	26.3908	4.20167	4.39667	5.30833	26.4562	4.44792
514.663	3.87833	36.4	26.4567	26.3142	4.19333	4.38167	5.295	26.3854	4.43708
514.862	3.875	36.3167	26.3767	26.2375	4.18167	4.37333	5.275	26.3071	4.42625
515.061	3.865	36.2367	26.3067	26.18	4.17167	4.36333	5.25667	26.2433	4.41417
515.259	3.84833	36.155	26.2333	26.1	4.15833	4.34667	5.24833	26.1667	4.40042
515.458	3.83333	36.0567	26.1533	26.0267	4.14667	4.33167	5.225	26.09	4.38417
515.657	3.81167	35.9617	26.0767	25.9475	4.12333	4.31	5.19667	26.0121	4.36042
515.855	3.79667	35.8883	25.9933	25.8617	4.105	4.29667	5.17167	25.9275	4.3425
516.054	3.795	35.8083	25.9117	25.785	4.09833	4.28667	5.165	25.8483	4.33625
516.253	3.79333	35.7333	25.835	25.7217	4.09833	4.29167	5.15667	25.7783	4.335
516.451	3.78667	35.65	25.7633	25.6392	4.07667	4.27	5.13833	25.7013	4.31792
516.65	3.77167	35.5433	25.6683	25.555	4.06167	4.25667	5.10833	25.6117	4.29958
516.848	3.74833	35.4567	25.575	25.4775	4.04	4.23333	5.08333	25.5262	4.27625
517.047	3.73167	35.36	25.5	25.4033	4.025	4.22	5.06833	25.4517	4.26125
517.246	3.71333	35.26	25.405	25.3008	4.00667	4.2	5.04667	25.3529	4.24167
517.444	3.69667	35.155	25.325	25.2142	3.98333	4.17833	5.01333	25.2696	4.21792
517.643	3.69167	35.0667	25.2367	25.13	3.96833	4.16	4.995	25.1833	4.20375
517.841	3.695	34.975	25.16	25.045	3.96833	4.15833	4.98667	25.1025	4.20208
518.04	3.68833	34.8783	25.0767	24.9625	3.955	4.145	4.97	25.0196	4.18958
518.238	3.68667	34.7717	24.9933	24.8733	3.94833	4.14167	4.95333	24.9333	4.1825
518.437	3.66167	34.67	24.9067	24.775	3.93	4.11667	4.93	24.8408	4.15958
518.635	3.66	34.5783	24.8183	24.6908	3.92167	4.11	4.91167	24.7546	4.15083
518.834	3.645	34.49	24.7267	24.6075	3.90167	4.09167	4.895	24.6671	4.13333
519.032	3.655	34.4067	24.655	24.5267	3.905	4.1	4.89667	24.5908	4.13917
519.231	3.65167	34.31	24.5817	24.455	3.89333	4.095	4.87833	24.5183	4.12958
519.429	3.65167	34.235	24.5167	24.3858	3.88667	4.085	4.86833	24.4513	4.12292
519.627	3.65333	34.1583	24.4467	24.3167	3.885	4.08667	4.85833	24.3817	4.12083
519.826	3.63833	34.0833	24.3817	24.2475	3.86833	4.075	4.84333	24.3146	4.10625
520.024	3.64	34.01	24.3133	24.1917	3.86333	4.07	4.83167	24.2525	4.10125
520.223	3.635	33.9367	24.2583	24.1283	3.85833	4.06167	4.82	24.1933	4.09375
520.421	3.61833	33.8717	24.195	24.0717	3.85	4.04167	4.8	24.1333	4.0775
520.619	3.61333	33.8017	24.1333	24.0125	3.83167	4.03	4.78333	24.0729	4.06458
520.818	3.60167	33.7317	24.0783	23.955	3.825	4.02167	4.77	24.0167	4.05458
521.016	3.60333	33.6633	24.0317	23.8992	3.825	4.01833	4.76667	23.9654	4.05333
521.214	3.59667	33.5917	23.975	23.8417	3.815	4	4.74667	23.9083	4.03958
521.413	3.58167	33.5367	23.9167	23.7717	3.81167	3.98833	4.74167	23.8442	4.03083
521.611	3.57333	33.465	23.845	23.7033	3.79833	3.98	4.73	23.7742	4.02042
521.809	3.57667	33.39	23.795	23.6525	3.805	3.975	4.73333	23.7238	4.0225
522.007	3.57167	33.3167	23.725	23.5967	3.805	3.97	4.725	23.6608	4.01792
522.206	3.55167	33.2317	23.655	23.5217	3.785	3.95667	4.70833	23.5883	4.00042
522.404	3.54167	33.1483	23.5883	23.4517	3.78	3.95	4.70167	23.52	3.99333
522.602	3.555	33.0817	23.535	23.3792	3.785	3.95833	4.70833	23.4571	4.00167
522.8	3.565	33	23.4767	23.3175	3.79333	3.96667	4.715	23.3971	4.01
522.998	3.56167	32.9117	23.4083	23.2425	3.79167	3.96167	4.70667	23.3254	4.00542
523.197	3.545	32.82	23.3283	23.165	3.77167	3.945	4.69333	23.2467	3.98875
523.395	3.535	32.73	23.2483	23.0833	3.76167	3.94	4.68	23.1658	3.97917
523.593	3.52667	32.6317	23.1717	23.0075	3.755	3.92667	4.66333	23.0896	3.96792
523.791	3.52167	32.5367	23.11	22.9442	3.75167	3.91833	4.65	23.0271	3.96042
523.989	3.49333	32.445	23.0267	22.8558	3.72667	3.89167	4.61667	22.9413	3.93208
524.187	3.48	32.345	22.9483	22.7625	3.70833	3.87167	4.59333	22.8554	3.91333
524.386	3.46667	32.25	22.8767	22.6875	3.69833	3.85333	4.57833	22.7821	3.89917
524.584	3.465	32.1417	22.8	22.6058	3.68667	3.845	4.56	22.7029	3.88917
524.782	3.44667	32.0433	22.7167	22.5225	3.66833	3.82167	4.535	22.6196	3.86792
524.98	3.435	31.9583	22.6333	22.4425	3.655	3.81	4.51833	22.5379	3.85458
525.178	3.42	31.8683	22.5533	22.3708	3.645	3.795	4.49833	22.4621	3.83958
525.376	3.41167	31.765	22.475	22.2908	3.63833	3.78833	4.48833	22.3829	3.83167
525.574	3.415	31.68	22.405	22.2175	3.63167	3.79	4.48667	22.3113	3.83083
525.772	3.40667	31.5783	22.315	22.135	3.61833	3.78667	4.47167	22.225	3.82083
525.97	3.40667	31.4967	22.23	22.0617	3.615	3.78333	4.46333	22.1458	3.81708
526.168	3.40667	31.3933	22.145	21.9808	3.61167	3.77833	4.45	22.0629	3.81167
526.366	3.405	31.3067	22.0633	21.895	3.6	3.77167	4.435	21.9792	3.80292
526.564	3.40167	31.23	21.995	21.82	3.59833	3.76833	4.42833	21.9075	3.79917
526.762	3.40333	31.16	21.9233	21.75	3.59667	3.765	4.42	21.8367	3.79625
526.96	3.39833	31.0833	21.8583	21.6842	3.59667	3.75833	4.41167	21.7713	3.79125
527.158	3.38833	31.0083	21.79	21.6133	3.58167	3.745	4.4	21.7017	3.77875
527.356	3.38833	30.9417	21.735	21.5467	3.58	3.74	4.38833	21.6408	3.77417
527.554	3.385	30.8733	21.67	21.4775	3.57	3.735	4.38167	21.5738	3.76792
527.752	3.375	30.7983	21.6033	21.4125	3.56333	3.72	4.35667	21.5079	3.75375
527.95	3.36833	30.7333	21.5433	21.3425	3.555	3.71	4.35	21.4429	3.74583
528.148	3.35333	30.6567	21.4717	21.2675	3.53667	3.69667	4.33167	21.3696	3.72958
528.345	3.34833	30.575	21.3967	21.2	3.53667	3.69	4.32333	21.2983	3.72458
528.543	3.33167	30.4733	21.3133	21.1142	3.52833	3.67667	4.315	21.2137	3.71292
528.741	3.325	30.3767	21.2217	21.035	3.51833	3.66667	4.30333	21.1283	3.70333
528.939	3.31	30.2867	21.1483	20.9508	3.5	3.65667	4.29167	21.0496	3.68958
529.137	3.29667	30.205	21.075	20.885	3.49	3.645	4.27333	20.98	3.67625
529.335	3.29333	30.1467	21.0217	20.825	3.48667	3.63833	4.26667	20.9233	3.67125
529.532	3.28667	30.09	20.9683	20.7758	3.47833	3.62667	4.25333	20.8721	3.66125
529.73	3.28667	30.0433	20.935	20.74	3.47667	3.62667	4.24833	20.8375	3.65958
529.928	3.28333	29.9967	20.895	20.6992	3.47	3.62	4.24333	20.7971	3.65417
530.126	3.28167	29.9467	20.86	20.6658	3.46833	3.61167	4.23667	20.7629	3.64958
530.324	3.28333	29.9	20.825	20.6258	3.47	3.61	4.235	20.7254	3.64958
530.521	3.28167	29.86	20.7967	20.5958	3.465	3.61167	4.235	20.6962	3.64833
530.719	3.285	29.825	20.775	20.5717	3.465	3.61167	4.23333	20.6733	3.64875
530.917	3.28333	29.7767	20.745	20.5392	3.46167	3.60833	4.22667	20.6421	3.645
531.114	3.285	29.7233	20.7033	20.5042	3.46333	3.605	4.22167	20.6037	3.64375
531.312	3.285	29.665	20.6617	20.455	3.46	3.60333	4.21667	20.5583	3.64125
531.51	3.285	29.5883	20.61	20.41	3.45667	3.6	4.21667	20.51	3.63958
531.707	3.285	29.5017	20.5517	20.3442	3.46	3.6	4.21333	20.4479	3.63958
531.905	3.28167	29.41	20.4783	20.2742	3.455	3.59333	4.20667	20.3762	3.63417
532.103	3.27667	29.3117	20.4117	20.1992	3.44833	3.58833	4.19833	20.3054	3.62792
532.3	3.27167	29.2183	20.3383	20.1283	3.445	3.58333	4.19667	20.2333	3.62417
532.498	3.26833	29.1183	20.26	20.0558	3.43833	3.57333	4.18333	20.1579	3.61583
532.696	3.25667	29.0067	20.17	19.9633	3.42667	3.56	4.16667	20.0667	3.6025
532.893	3.25167	28.8983	20.0883	19.8642	3.41833	3.55	4.15333	19.9763	3.59333
533.091	3.24333	28.785	19.9983	19.7708	3.40833	3.545	4.14333	19.8846	3.585
533.288	3.23667	28.6717	19.9	19.6775	3.39667	3.535	4.13333	19.7888	3.57542
533.486	3.22667	28.555	19.805	19.5783	3.39333	3.52667	4.11833	19.6917	3.56625
533.683	3.22	28.4417	19.7183	19.4842	3.38833	3.52333	4.10167	19.6013	3.55833
533.881	3.20833	28.35	19.6317	19.4075	3.37333	3.51	4.08833	19.5196	3.545
534.078	3.2	28.2583	19.5517	19.325	3.36333	3.50167	4.07667	19.4383	3.53542
534.276	3.195	28.1767	19.4817	19.2575	3.36167	3.495	4.07	19.3696	3.53042
534.473	3.195	28.0983	19.4167	19.1958	3.35333	3.49167	4.05333	19.3062	3.52333
534.671	3.19167	28.0333	19.3617	19.145	3.34667	3.48667	4.04167	19.2533	3.51667
534.868	3.19333	27.975	19.315	19.095	3.34833	3.48333	4.04	19.205	3.51625
535.066	3.19	27.92	19.265	19.0592	3.345	3.47833	4.03333	19.1621	3.51167
535.263	3.18833	27.8717	19.225	19.0175	3.34167	3.475	4.025	19.1212	3.5075
535.461	3.18	27.83	19.1883	18.98	3.335	3.47	4.01333	19.0842	3.49958
535.658	3.18167	27.7833	19.1517	18.9425	3.33167	3.46667	4.00667	19.0471	3.49667
535.856	3.17833	27.735	19.1167	18.9058	3.32833	3.465	4.005	19.0113	3.49417
536.053	3.17833	27.6733	19.075	18.8592	3.32833	3.45833	4.00167	18.9671	3.49167
536.25	3.17833	27.5967	19.0183	18.8108	3.32667	3.45333	3.99333	18.9146	3.48792
536.448	3.17833	27.52	18.9617	18.7483	3.32333	3.45	3.98833	18.855	3.485
536.645	3.175	27.4367	18.8983	18.6767	3.32333	3.445	3.985	18.7875	3.48208
536.842	3.165	27.35	18.82	18.5917	3.31333	3.44	3.97833	18.7058	3.47417
537.04	3.15833	27.2567	18.7367	18.5167	3.30667	3.43333	3.975	18.6267	3.46833
537.237	3.155	27.155	18.6517	18.4242	3.30167	3.42333	3.96333	18.5379	3.46083
537.434	3.15333	27.05	18.57	18.3425	3.295	3.415	3.95167	18.4563	3.45375
537.632	3.15	26.9533	18.485	18.2633	3.295	3.415	3.94667	18.3742	3.45167
537.829	3.145	26.865	18.4183	18.19	3.28833	3.40667	3.93667	18.3042	3.44417
538.026	3.13833	26.785	18.3483	18.1175	3.27833	3.40333	3.93	18.2329	3.4375
538.223	3.14	26.715	18.2967	18.0542	3.27833	3.40167	3.92333	18.1754	3.43583
538.421	3.13833	26.6533	18.245	18.0008	3.275	3.39833	3.92	18.1229	3.43292
538.618	3.135	26.5917	18.2	17.9567	3.27833	3.39833	3.915	18.0783	3.43167
538.815	3.135	26.5317	18.1517	17.9125	3.27	3.39	3.905	18.0321	3.425
539.012	3.12333	26.4667	18.105	17.8742	3.265	3.38333	3.89333	17.9896	3.41625
539.21	3.11833	26.4033	18.06	17.8283	3.255	3.37167	3.88167	17.9442	3.40667
539.407	3.12	26.3383	18.0217	17.7825	3.25667	3.37333	3.87833	17.9021	3.40708
539.604	3.12333	26.2833	17.9767	17.7425	3.25667	3.37333	3.87667	17.8596	3.4075
539.801	3.12	26.215	17.935	17.6908	3.25333	3.36	3.87167	17.8129	3.40125
539.998	3.11333	26.1417	17.8717	17.6358	3.245	3.35167	3.86833	17.7538	3.39458
540.195	3.115	26.0667	17.8133	17.58	3.24833	3.35	3.86167	17.6967	3.39375
540.393	3.10333	25.9667	17.725	17.5058	3.23667	3.33	3.84833	17.6154	3.37958
540.59	3.09667	25.8767	17.655	17.4358	3.22833	3.32167	3.845	17.5454	3.37292
540.787	3.09167	25.7683	17.57	17.3533	3.215	3.32	3.83333	17.4617	3.365
540.984	3.08333	25.66	17.4733	17.2692	3.205	3.30833	3.82167	17.3712	3.35458
541.181	3.085	25.5467	17.3867	17.1692	3.20333	3.30667	3.82167	17.2779	3.35417
541.378	3.08	25.4317	17.29	17.065	3.195	3.3	3.81333	17.1775	3.34708
541.575	3.06667	25.32	17.1867	16.9725	3.17833	3.28667	3.79833	17.0796	3.3325
541.772	3.05167	25.215	17.0983	16.8817	3.17167	3.27667	3.78667	16.99	3.32167
541.969	3.04667	25.1233	17.0183	16.8008	3.165	3.27333	3.77167	16.9096	3.31417
542.166	3.04167	25.0467	16.9567	16.7375	3.155	3.26167	3.75333	16.8471	3.30292
542.363	3.03833	24.9733	16.8917	16.6708	3.15167	3.255	3.745	16.7812	3.2975
542.56	3.03667	24.92	16.8483	16.6308	3.14667	3.25	3.74167	16.7396	3.29375
542.757	3.03833	24.87	16.81	16.5917	3.14833	3.25167	3.735	16.7008	3.29333
542.954	3.03333	24.82	16.7683	16.5542	3.14333	3.24	3.725	16.6613	3.28542
543.151	3.03	24.7767	16.7333	16.5125	3.13833	3.235	3.71333	16.6229	3.27917
543.348	3.025	24.7333	16.6983	16.4867	3.13333	3.23333	3.70667	16.5925	3.27458
543.545	3.02667	24.6883	16.6617	16.4583	3.135	3.23167	3.70333	16.56	3.27417
543.742	3.02667	24.64	16.625	16.4242	3.13333	3.225	3.695	16.5246	3.27
543.939	3.03167	24.5883	16.5883	16.3883	3.12833	3.22667	3.68667	16.4883	3.26833
544.135	3.03167	24.53	16.55	16.3517	3.13	3.225	3.685	16.4508	3.26792
544.332	3.02833	24.4733	16.5067	16.3083	3.13	3.225	3.68167	16.4075	3.26625
544.529	3.02833	24.4067	16.46	16.2683	3.125	3.22167	3.67833	16.3642	3.26333
544.726	3.02	24.3383	16.41	16.2167	3.125	3.22	3.67333	16.3133	3.25958
544.923	3.01	24.2767	16.3583	16.1633	3.12167	3.21167	3.66333	16.2608	3.25167
545.12	3.01167	24.21	16.3133	16.1175	3.11667	3.21167	3.65667	16.2154	3.24917
545.316	3.015	24.1417	16.2633	16.0725	3.12167	3.21	3.66	16.1679	3.25167
545.513	3.015	24.0717	16.2117	16.0117	3.12667	3.20833	3.66	16.1117	3.2525
545.71	3.01333	24.0017	16.1667	15.9625	3.12333	3.20833	3.655	16.0646	3.25
545.907	3.00667	23.9183	16.1067	15.9025	3.12167	3.20333	3.65167	16.0046	3.24583
546.104	2.99833	23.8383	16.045	15.8433	3.11167	3.19667	3.645	15.9442	3.23792
546.3	2.99	23.76	15.975	15.7792	3.11	3.19	3.64167	15.8771	3.23292
546.497	3	23.6767	15.9183	15.7225	3.11167	3.19	3.63833	15.8204	3.235
546.694	2.995	23.6	15.8617	15.6608	3.11167	3.18667	3.635	15.7613	3.23208
546.89	2.99833	23.5167	15.7983	15.5942	3.10667	3.18667	3.63333	15.6962	3.23125
547.087	3	23.4183	15.7367	15.5292	3.11167	3.19	3.63167	15.6329	3.23333
547.284	2.99	23.34	15.66	15.4575	3.10167	3.18333	3.63	15.5587	3.22625
547.481	2.985	23.2517	15.595	15.39	3.09	3.18	3.62167	15.4925	3.21917
547.677	2.98	23.17	15.5333	15.3325	3.08167	3.17333	3.61	15.4329	3.21125
547.874	2.97	23.085	15.47	15.2667	3.07833	3.16333	3.59667	15.3683	3.20208
548.07	2.975	23.0267	15.4183	15.2217	3.07833	3.16667	3.59667	15.32	3.20417
548.267	2.97167	22.9517	15.3667	15.1683	3.07333	3.16	3.59	15.2675	3.19875
548.464	2.975	22.8933	15.3233	15.1275	3.06833	3.15833	3.59167	15.2254	3.19833
548.66	2.97333	22.8367	15.28	15.0825	3.06333	3.15667	3.585	15.1812	3.19458
548.857	2.96833	22.7783	15.2367	15.04	3.055	3.145	3.575	15.1383	3.18583
549.053	2.955	22.7117	15.1867	14.9892	3.04333	3.13333	3.565	15.0879	3.17417
549.25	2.94	22.6483	15.1333	14.935	3.02667	3.12333	3.54833	15.0342	3.15958
549.447	2.94167	22.5817	15.0917	14.8917	3.02667	3.12167	3.54333	14.9917	3.15833
549.643	2.94667	22.5317	15.0517	14.8525	3.02833	3.11833	3.54	14.9521	3.15833
549.84	2.94333	22.4717	15.0017	14.805	3.02333	3.11833	3.53667	14.9033	3.15542
550.036	2.96	22.4183	14.9683	14.7742	3.03833	3.13167	3.55667	14.8712	3.17167
550.233	2.95	22.36	14.915	14.7133	3.03167	3.125	3.545	14.8142	3.16292
550.429	2.95	22.3033	14.8767	14.6708	3.04	3.12833	3.54667	14.7737	3.16625
550.626	2.95333	22.2317	14.8283	14.6225	3.04667	3.12667	3.54333	14.7254	3.1675
550.822	2.955	22.165	14.7767	14.5675	3.04833	3.125	3.54	14.6721	3.16708
551.018	2.96167	22.0883	14.7233	14.5217	3.05333	3.13	3.54667	14.6225	3.17292
551.215	2.97	22.025	14.6733	14.48	3.065	3.13833	3.555	14.5767	3.18208
551.411	2.97667	21.9517	14.6133	14.435	3.07	3.13667	3.555	14.5242	3.18458
551.608	2.97667	21.8767	14.56	14.3775	3.07167	3.13333	3.55333	14.4688	3.18375
551.804	2.985	21.81	14.5133	14.3333	3.08167	3.14167	3.56	14.4233	3.19208
552	2.98333	21.7367	14.4567	14.2758	3.08	3.13833	3.55333	14.3663	3.18875
552.197	2.95833	21.64	14.38	14.1967	3.05333	3.115	3.52667	14.2883	3.16333
552.393	2.96833	21.5617	14.3267	14.1508	3.05167	3.11667	3.52833	14.2387	3.16625
552.59	2.97333	21.4883	14.265	14.0933	3.05	3.12333	3.53333	14.1792	3.17
552.786	2.96667	21.395	14.1933	14.015	3.03833	3.11333	3.51667	14.1042	3.15875
552.982	2.96333	21.3017	14.1167	13.9433	3.02333	3.09833	3.505	14.03	3.1475
553.179	2.95167	21.2183	14.06	13.8808	3.015	3.09333	3.495	13.9704	3.13875
553.375	2.95333	21.145	14.0067	13.8242	3.01167	3.095	3.49	13.9154	3.1375
553.571	2.955	21.075	13.96	13.7683	3.015	3.10167	3.49167	13.8642	3.14083
553.767	2.95333	21.0033	13.9117	13.7275	3.00833	3.105	3.48667	13.8196	3.13833
553.964	2.94167	20.925	13.85	13.6683	3	3.095	3.47167	13.7592	3.12708
554.16	2.94833	20.8567	13.8067	13.6317	3.005	3.09667	3.47333	13.7192	3.13083
554.356	2.95	20.7933	13.76	13.6	3.01333	3.09667	3.47667	13.68	3.13417
554.552	2.94167	20.7317	13.7133	13.5442	3.005	3.08833	3.46667	13.6288	3.12542
554.748	2.93833	20.6733	13.6633	13.5025	3.01	3.08667	3.46833	13.5829	3.12583
554.945	2.95167	20.6333	13.635	13.475	3.025	3.09	3.47833	13.555	3.13625
555.141	2.95333	20.5867	13.6017	13.44	3.02333	3.09333	3.48167	13.5208	3.13792
555.337	2.95333	20.5283	13.55	13.3942	3.02333	3.095	3.48167	13.4721	3.13833
555.533	2.95667	20.4733	13.5017	13.3542	3.025	3.09167	3.47333	13.4279	3.13667
555.729	2.95833	20.415	13.455	13.3158	3.02333	3.09167	3.47833	13.3854	3.13792
555.925	2.95667	20.355	13.4083	13.2658	3.02333	3.09167	3.47167	13.3371	3.13583
556.122	2.95667	20.2883	13.3633	13.2317	3.02667	3.09833	3.47333	13.2975	3.13875
556.318	2.95833	20.2367	13.335	13.1775	3.03667	3.10167	3.47833	13.2563	3.14375
556.514	2.96167	20.175	13.285	13.1217	3.02667	3.09667	3.475	13.2033	3.14
556.71	2.96667	20.1067	13.2333	13.0742	3.02	3.09333	3.47333	13.1538	3.13833
556.906	2.965	20.0367	13.1867	13.0217	3.02	3.09	3.46667	13.1042	3.13542
557.102	2.96	19.9633	13.1317	12.9608	3.01667	3.08667	3.46333	13.0463	3.13167
557.298	2.96333	19.89	13.08	12.9217	3.03667	3.10167	3.47333	13.0008	3.14375
557.494	2.97667	19.8283	13.0433	12.88	3.04667	3.10667	3.48667	12.9617	3.15417
557.69	2.96333	19.7433	12.9933	12.8158	3.03	3.09667	3.47667	12.9046	3.14167
557.886	2.96333	19.6767	12.9433	12.7558	3.02833	3.08667	3.46833	12.8496	3.13667
558.082	2.98	19.615	12.9033	12.7183	3.04167	3.09667	3.48167	12.8108	3.15
558.278	2.97667	19.5433	12.8533	12.6608	3.03167	3.08167	3.47333	12.7571	3.14083
558.474	2.98167	19.4883	12.8117	12.6225	3.04	3.09667	3.47667	12.7171	3.14875
558.67	2.97833	19.405	12.7667	12.57	3.04167	3.09333	3.46667	12.6683	3.145
558.866	2.99833	19.3533	12.7433	12.555	3.065	3.12333	3.495	12.6492	3.17042
559.062	3.00667	19.2967	12.7083	12.5167	3.07	3.135	3.50667	12.6125	3.17958
559.258	3.015	19.2333	12.6667	12.4833	3.07167	3.13667	3.51667	12.575	3.185
559.454	3.00333	19.165	12.615	12.4267	3.05	3.11667	3.49167	12.5208	3.16542
559.649	2.995	19.085	12.5533	12.3675	3.04333	3.10833	3.48167	12.4604	3.15708
559.845	3.005	19.0467	12.5133	12.3317	3.05167	3.11333	3.48833	12.4225	3.16458
560.041	3.00167	18.9733	12.4683	12.2825	3.045	3.11	3.48833	12.3754	3.16125
560.237	2.98333	18.8967	12.4083	12.2175	3.03167	3.09167	3.47167	12.3129	3.14458
560.433	2.98	18.8317	12.3583	12.1692	3.025	3.08333	3.46667	12.2637	3.13875
560.629	2.96333	18.7567	12.2867	12.115	3.01333	3.06333	3.45333	12.2008	3.12333
560.824	2.96333	18.7017	12.24	12.0683	3.00833	3.05333	3.46167	12.1542	3.12167
561.02	2.96	18.635	12.1917	12.02	3.01	3.05167	3.45	12.1058	3.11792
561.216	2.95833	18.5617	12.14	11.9667	3.00167	3.04833	3.44333	12.0533	3.11292
561.412	2.93333	18.4967	12.085	11.905	2.98667	3.03833	3.42	11.995	3.09458
561.608	2.93	18.43	12.0417	11.855	2.98333	3.04167	3.415	11.9483	3.0925
561.803	2.93667	18.37	12.0017	11.8158	2.98833	3.04167	3.42	11.9088	3.09667
561.999	2.94	18.3017	11.9583	11.7783	3	3.04333	3.42167	11.8683	3.10125
562.195	2.94333	18.245	11.9083	11.7358	3.00667	3.05	3.42167	11.8221	3.10542
562.39	2.95167	18.18	11.87	11.6933	3.00667	3.05167	3.42333	11.7817	3.10833
562.586	2.94833	18.1167	11.825	11.6383	3.00333	3.055	3.43333	11.7317	3.11
562.782	2.93667	18.0417	11.7833	11.5833	2.99667	3.055	3.425	11.6833	3.10333
562.978	2.94667	17.9883	11.7483	11.5433	3.00333	3.06167	3.42333	11.6458	3.10875
563.173	2.93333	17.9317	11.6883	11.4842	2.98833	3.04333	3.40833	11.5862	3.09333
563.369	2.93333	17.88	11.6567	11.4425	2.98833	3.04333	3.40833	11.5496	3.09333
563.564	2.945	17.82	11.6217	11.4025	2.99333	3.04667	3.41833	11.5121	3.10083
563.76	2.94667	17.765	11.5767	11.37	2.99667	3.04667	3.42833	11.4733	3.10458
563.956	2.93667	17.7083	11.5267	11.3167	2.98667	3.04333	3.425	11.4217	3.09792
564.151	2.92833	17.65	11.4867	11.2758	2.98	3.03833	3.42167	11.3812	3.09208
564.347	2.94	17.5967	11.4517	11.2408	2.985	3.045	3.43	11.3462	3.1
564.542	2.93	17.545	11.4067	11.2083	2.98667	3.05	3.42833	11.3075	3.09875
564.738	2.94167	17.495	11.3717	11.1783	2.99167	3.05833	3.42833	11.275	3.105
564.934	2.955	17.44	11.33	11.1358	2.99833	3.055	3.43333	11.2329	3.11042
565.129	2.955	17.3817	11.2933	11.0975	2.99833	3.055	3.44	11.1954	3.11208
565.325	2.955	17.315	11.25	11.0475	2.99333	3.05167	3.435	11.1487	3.10875
565.52	2.945	17.23	11.1817	10.9908	2.97333	3.035	3.42	11.0862	3.09333
565.716	2.93167	17.1467	11.12	10.9258	2.965	3.03	3.40833	11.0229	3.08375
565.911	2.925	17.0683	11.0617	10.8675	2.95667	3.02333	3.4	10.9646	3.07625
566.106	2.92333	16.9933	11.015	10.82	2.94833	3.02	3.38833	10.9175	3.07
566.302	2.90667	16.9117	10.9583	10.745	2.93167	3.00667	3.375	10.8517	3.055
566.497	2.905	16.85	10.9083	10.6983	2.93	3.01167	3.37	10.8033	3.05417
566.693	2.91833	16.79	10.8767	10.6592	2.94	3.01833	3.37833	10.7679	3.06375
566.888	2.91333	16.7283	10.8283	10.615	2.94333	3.01667	3.37833	10.7217	3.06292
567.084	2.92333	16.6867	10.8017	10.5842	2.95667	3.02667	3.395	10.6929	3.07542
567.279	2.925	16.6233	10.7583	10.5442	2.965	3.03667	3.39	10.6512	3.07917
567.474	2.92167	16.5617	10.72	10.5017	2.95833	3.035	3.385	10.6108	3.075
567.67	2.92167	16.5183	10.695	10.4683	2.96833	3.03833	3.39167	10.5817	3.08
567.865	2.935	16.4883	10.6617	10.4508	2.97667	3.04667	3.4	10.5563	3.08958
568.06	2.94	16.4483	10.6333	10.425	2.98	3.05167	3.405	10.5292	3.09417
568.256	2.93667	16.4067	10.6	10.3933	2.98	3.04333	3.40833	10.4967	3.09208
568.451	2.95333	16.3733	10.5767	10.3783	2.99833	3.06	3.42	10.4775	3.10792
568.646	2.94333	16.3167	10.5417	10.3425	2.995	3.05333	3.42167	10.4421	3.10333
568.842	2.94	16.2683	10.5033	10.3117	2.99667	3.05667	3.425	10.4075	3.10458
569.037	2.94167	16.225	10.4833	10.2692	2.99833	3.06	3.42333	10.3763	3.10583
569.232	2.93333	16.1717	10.4433	10.2325	2.98667	3.05167	3.41667	10.3379	3.09708
569.427	2.92833	16.125	10.4033	10.1883	2.97833	3.04833	3.42	10.2958	3.09375
569.623	2.925	16.0733	10.3717	10.15	2.985	3.05167	3.43	10.2608	3.09792
569.818	2.93333	16.0267	10.3317	10.1167	2.99	3.06	3.43833	10.2242	3.10542
570.013	2.925	15.97	10.3083	10.0658	2.98667	3.05833	3.44	10.1871	3.1025
570.208	2.92167	15.9083	10.2667	10.0125	2.98833	3.055	3.43667	10.1396	3.10042
570.403	2.94333	15.8567	10.2433	9.98833	3	3.07667	3.45333	10.1158	3.11833
570.599	2.94667	15.7983	10.2117	9.94083	2.98833	3.065	3.45	10.0763	3.1125
570.794	2.95667	15.75	10.1783	9.9025	2.99667	3.065	3.45167	10.0404	3.1175
570.989	2.95833	15.6967	10.1367	9.86	3.00167	3.06333	3.44667	9.99833	3.1175
571.184	2.95333	15.6283	10.0783	9.82417	3	3.06167	3.445	9.95125	3.115
571.379	2.96167	15.5667	10.0383	9.7875	3.00333	3.05833	3.44333	9.91292	3.11667
571.574	2.96333	15.515	10	9.75833	3.01	3.065	3.43833	9.87917	3.11917
571.769	2.95667	15.4517	9.95	9.71917	3.00833	3.06	3.43167	9.83458	3.11417
571.964	2.95333	15.3783	9.89833	9.66917	2.99333	3.045	3.42333	9.78375	3.10375
572.159	2.95667	15.3133	9.85833	9.63417	2.99667	3.05	3.41667	9.74625	3.105
572.354	2.95833	15.25	9.81667	9.60417	2.99333	3.04333	3.41167	9.71042	3.10167
572.55	2.94333	15.1933	9.77833	9.555	2.99	3.03667	3.405	9.66667	3.09375
572.745	2.93667	15.1283	9.72667	9.51083	2.99	3.03667	3.4	9.61875	3.09083
572.94	2.94167	15.0717	9.69167	9.47417	2.985	3.04333	3.39833	9.58292	3.09208
573.135	2.93333	15.0167	9.64833	9.4425	2.98	3.03833	3.395	9.54542	3.08667
573.33	2.94167	14.9767	9.63167	9.40583	2.98667	3.045	3.4	9.51875	3.09333
573.525	2.93667	14.9233	9.60167	9.37083	2.98167	3.045	3.40333	9.48625	3.09167
573.719	2.92833	14.8733	9.555	9.3225	2.96333	3.035	3.38833	9.43875	3.07875
573.914	2.94333	14.8433	9.54833	9.315	2.98	3.05167	3.41	9.43167	3.09625
574.109	2.93667	14.8033	9.52333	9.2825	2.98667	3.05167	3.40833	9.40292	3.09583
574.304	2.93333	14.7633	9.48833	9.24333	2.98	3.04833	3.41167	9.36583	3.09333
574.499	2.935	14.7283	9.465	9.20917	2.98	3.05833	3.42	9.33708	3.09833
574.694	2.93833	14.6883	9.42667	9.18333	2.98667	3.06	3.42	9.305	3.10125
574.889	2.945	14.6517	9.41	9.16333	2.99167	3.065	3.42667	9.28667	3.10708
575.084	2.94333	14.6133	9.375	9.13083	2.99333	3.06	3.43	9.25292	3.10667
575.279	2.945	14.5717	9.35167	9.09167	2.99	3.06167	3.43833	9.22167	3.10875
575.474	2.93	14.5133	9.31167	9.04667	2.975	3.055	3.42667	9.17917	3.09667
575.668	2.93333	14.465	9.275	9.0125	2.97833	3.05333	3.43	9.14375	3.09875
575.863	2.93833	14.4117	9.25	8.98667	2.985	3.06333	3.43833	9.11833	3.10625
576.058	2.94	14.3617	9.21167	8.95	2.99167	3.06167	3.43167	9.08083	3.10625
576.253	2.94667	14.3183	9.185	8.93083	2.99333	3.07	3.44667	9.05792	3.11417
576.448	2.95	14.27	9.15333	8.90083	3	3.075	3.45167	9.02708	3.11917
576.642	2.94833	14.2133	9.12	8.87083	2.99167	3.065	3.445	8.99542	3.1125
576.837	2.93667	14.1633	9.08833	8.83333	2.98833	3.06	3.44167	8.96083	3.10667
577.032	2.93167	14.125	9.06167	8.80583	2.98833	3.06333	3.44333	8.93375	3.10667
577.226	2.925	14.0683	9.02833	8.77083	2.98167	3.055	3.43667	8.89958	3.09958
577.421	2.92167	14.0167	8.995	8.74333	2.98167	3.05333	3.425	8.86917	3.09542
577.616	2.92167	13.9667	8.95667	8.71	2.975	3.04333	3.41333	8.83333	3.08833
577.811	2.925	13.9383	8.93833	8.69333	2.98	3.05167	3.41667	8.81583	3.09333
578.005	2.92167	13.895	8.91167	8.65667	2.98167	3.05333	3.42	8.78417	3.09417
578.2	2.92	13.8517	8.885	8.6175	2.96833	3.045	3.415	8.75125	3.08708
578.395	2.92	13.8	8.85	8.57667	2.96333	3.03667	3.40167	8.71333	3.08042
578.589	2.91667	13.7567	8.82667	8.55167	2.96333	3.03833	3.395	8.68917	3.07833
578.784	2.92	13.725	8.80333	8.5425	2.975	3.05167	3.40833	8.67292	3.08875
578.978	2.93333	13.6883	8.78167	8.52167	2.97667	3.05167	3.41833	8.65167	3.095
579.173	2.935	13.645	8.75333	8.49583	2.97833	3.055	3.42167	8.62458	3.0975
579.368	2.94833	13.615	8.73667	8.47833	2.98667	3.06167	3.43	8.6075	3.10667
579.562	2.95833	13.5783	8.71333	8.4625	2.995	3.07	3.44333	8.58792	3.11667
579.757	2.97667	13.5667	8.72167	8.46833	3.02333	3.09667	3.48	8.595	3.14417
579.951	2.97333	13.5133	8.685	8.42333	3.01333	3.08333	3.47667	8.55417	3.13667
580.146	2.97833	13.475	8.66333	8.4175	3.01333	3.08333	3.48167	8.54042	3.13917
580.34	2.96667	13.4233	8.62	8.385	3.00667	3.075	3.47667	8.5025	3.13125
580.535	2.97667	13.395	8.61	8.38167	3.015	3.08333	3.49167	8.49583	3.14167
580.729	2.975	13.3483	8.57	8.345	3.00667	3.08333	3.485	8.4575	3.1375
580.924	2.98667	13.3117	8.55333	8.32667	3.00833	3.09167	3.47833	8.44	3.14125
581.118	2.98667	13.2817	8.52667	8.29917	3.01833	3.09667	3.48667	8.41292	3.14708
581.313	2.98333	13.225	8.48833	8.2675	3.01	3.08667	3.47167	8.37792	3.13792
581.507	2.98167	13.18	8.45833	8.2425	3.01167	3.08667	3.47833	8.35042	3.13958
581.702	2.98333	13.1467	8.42833	8.21667	3.01167	3.08667	3.48167	8.3225	3.14083
581.896	2.975	13.0983	8.38167	8.17917	3.00833	3.08167	3.46167	8.28042	3.13167
582.09	2.985	13.0667	8.355	8.16417	3.02167	3.09	3.46833	8.25958	3.14125
582.285	2.98333	13.0417	8.32333	8.13333	3.02833	3.095	3.465	8.22833	3.14292
582.479	2.99333	13.0083	8.30667	8.11167	3.04833	3.105	3.47	8.20917	3.15417
582.673	2.98833	12.965	8.27833	8.08667	3.04667	3.10833	3.47833	8.1825	3.15542
582.868	3.00667	12.9383	8.27833	8.07417	3.06667	3.11667	3.48667	8.17625	3.16917
583.062	2.99167	12.8783	8.23167	8.03	3.05333	3.10833	3.475	8.13083	3.15708
583.256	3	12.845	8.20667	8.01417	3.06167	3.11333	3.48	8.11042	3.16375
583.451	2.99167	12.805	8.17333	7.99083	3.05667	3.10667	3.48167	8.08208	3.15917
583.645	2.99667	12.775	8.15667	7.97167	3.065	3.11667	3.485	8.06417	3.16583
583.839	2.97667	12.715	8.11833	7.93583	3.05167	3.09833	3.47167	8.02708	3.14958
584.034	2.985	12.6733	8.09167	7.91	3.04667	3.09833	3.47667	8.00083	3.15167
584.228	2.98167	12.6183	8.07	7.87917	3.045	3.10333	3.47333	7.97458	3.15083
584.422	2.98	12.5633	8.03833	7.85583	3.04167	3.09833	3.47167	7.94708	3.14792
584.616	2.97667	12.515	8.01833	7.83917	3.04333	3.10167	3.48333	7.92875	3.15125
584.811	2.98833	12.4933	7.99167	7.8175	3.055	3.10833	3.475	7.90458	3.15667
585.005	2.975	12.44	7.95	7.77583	3.045	3.09667	3.475	7.86292	3.14792
585.199	2.99	12.4083	7.94	7.76917	3.05667	3.105	3.48667	7.85458	3.15958
585.393	2.97167	12.3467	7.90333	7.72833	3.04167	3.10667	3.47167	7.81583	3.14792
585.587	2.97667	12.315	7.895	7.71417	3.05667	3.12	3.48167	7.80458	3.15875
585.781	2.97	12.2717	7.865	7.695	3.06167	3.125	3.48167	7.78	3.15958
585.976	2.98167	12.23	7.83833	7.6725	3.06667	3.13167	3.48	7.75542	3.165
586.17	2.975	12.19	7.8	7.64833	3.06667	3.12	3.48167	7.72417	3.16083
586.364	2.965	12.1417	7.75833	7.61167	3.04833	3.10667	3.47833	7.685	3.14958
586.558	2.97167	12.0967	7.72833	7.58167	3.04667	3.105	3.485	7.655	3.15208
586.752	2.98	12.08	7.70833	7.5725	3.05333	3.11833	3.49	7.64042	3.16042
586.946	2.96	12.02	7.68333	7.54333	3.04667	3.10833	3.485	7.61333	3.15
587.14	2.98	11.9917	7.66333	7.53083	3.06167	3.115	3.49333	7.59708	3.1625
587.334	2.975	11.9533	7.63	7.50667	3.065	3.11333	3.49833	7.56833	3.16292
587.528	2.985	11.915	7.61167	7.48833	3.06667	3.115	3.51	7.55	3.16917
587.722	2.995	11.8883	7.58667	7.46333	3.07333	3.12	3.51833	7.525	3.17667
587.916	2.98667	11.8367	7.55167	7.42417	3.06667	3.09833	3.51	7.48792	3.16542
588.11	2.99833	11.8117	7.54667	7.41333	3.075	3.11667	3.52333	7.48	3.17833
588.304	2.99333	11.765	7.52	7.38917	3.07833	3.13	3.52	7.45458	3.18042
588.498	3.015	11.7367	7.515	7.39	3.1	3.135	3.53	7.4525	3.195
588.692	3.01833	11.7033	7.495	7.36333	3.10833	3.14	3.53667	7.42917	3.20083
588.886	3.00333	11.6583	7.46167	7.32583	3.1	3.125	3.535	7.39375	3.19083
589.08	3.01	11.615	7.42833	7.29833	3.09833	3.12333	3.54	7.36333	3.19292
589.274	2.97333	11.5417	7.38	7.24167	3.065	3.095	3.51667	7.31083	3.1625
589.468	2.98667	11.5083	7.36	7.2225	3.07	3.10833	3.51667	7.29125	3.17042
589.662	2.985	11.4733	7.32667	7.19167	3.06833	3.095	3.51167	7.25917	3.165
589.855	2.98333	11.4283	7.3	7.17917	3.06	3.09833	3.51333	7.23958	3.16375
590.049	2.98667	11.3883	7.27333	7.15833	3.05	3.09667	3.51833	7.21583	3.16292
590.243	2.97667	11.3483	7.245	7.135	3.04333	3.08667	3.515	7.19	3.15542
590.437	2.98833	11.3183	7.24	7.11083	3.045	3.09667	3.525	7.17542	3.16375
590.631	2.96333	11.2733	7.19333	7.0725	3.02833	3.08833	3.50333	7.13292	3.14583
590.825	2.95667	11.2383	7.16333	7.05333	3.01833	3.07833	3.50333	7.10833	3.13917
591.018	2.945	11.1833	7.12333	7.02583	3.00167	3.07	3.485	7.07458	3.12542
591.212	2.94833	11.1567	7.09333	7.00917	3.00167	3.07167	3.48333	7.05125	3.12625
591.406	2.97833	11.1517	7.09167	7.02833	3.03167	3.10333	3.51667	7.06	3.1575
591.6	2.97333	11.1167	7.075	7.01	3.02167	3.09167	3.51167	7.0425	3.14958
591.793	2.975	11.09	7.05667	6.99	3.025	3.1	3.51167	7.02333	3.15292
591.987	2.99167	11.0667	7.05333	6.97833	3.045	3.11	3.51667	7.01583	3.16583
592.181	2.99833	11.0517	7.04	6.975	3.06333	3.12	3.52333	7.0075	3.17625
592.375	3.005	11.0333	7.025	6.96	3.07333	3.13167	3.53167	6.9925	3.18542
592.568	3.00167	10.9967	6.99667	6.9475	3.07333	3.125	3.53	6.97208	3.1825
592.762	3.025	10.9867	6.99667	6.9425	3.08667	3.14167	3.55167	6.96958	3.20125
592.956	3.01667	10.955	6.98	6.91833	3.08667	3.145	3.54833	6.94917	3.19917
593.149	3.02167	10.9333	6.96833	6.91583	3.10333	3.15667	3.555	6.94208	3.20917
593.343	3.02833	10.9083	6.96833	6.915	3.11333	3.165	3.57	6.94167	3.21917
593.536	3.01	10.8617	6.93333	6.87333	3.09833	3.15167	3.55	6.90333	3.2025
593.73	3.015	10.8267	6.90167	6.8475	3.10333	3.15333	3.55333	6.87458	3.20625
593.924	3.00667	10.7717	6.865	6.82417	3.09333	3.14167	3.55	6.84458	3.19792
594.117	2.97167	10.7033	6.805	6.77	3.05667	3.11667	3.52	6.7875	3.16625
594.311	2.965	10.6433	6.775	6.73333	3.04	3.10333	3.51833	6.75417	3.15667
594.504	2.95167	10.5917	6.73333	6.69917	3.03333	3.09333	3.505	6.71625	3.14583
594.698	2.945	10.5483	6.69833	6.6625	3.01667	3.07833	3.49667	6.68042	3.13417
594.891	2.93	10.4967	6.65	6.63417	3.00833	3.07167	3.49	6.64208	3.125
595.085	2.94667	10.4567	6.63167	6.61833	3.01833	3.075	3.49167	6.625	3.13292
595.278	2.95	10.4133	6.60833	6.59083	3.015	3.07333	3.495	6.59958	3.13333
595.472	2.92333	10.3467	6.55	6.53667	2.99	3.045	3.46333	6.54333	3.10542
595.665	2.925	10.3117	6.535	6.5225	2.98667	3.05167	3.47	6.52875	3.10833
595.859	2.91833	10.2717	6.50333	6.495	2.98167	3.045	3.45333	6.49917	3.09958
596.052	2.93667	10.265	6.50167	6.5	3	3.07333	3.46667	6.50083	3.11917
596.246	2.96167	10.2633	6.51167	6.50417	3.025	3.09833	3.50167	6.50792	3.14667
596.439	2.95833	10.23	6.47833	6.4775	3.01833	3.09167	3.48833	6.47792	3.13917
596.633	2.97333	10.1983	6.47	6.46667	3.025	3.105	3.50333	6.46833	3.15167
596.826	2.97333	10.17	6.44833	6.4475	3.03333	3.10833	3.51833	6.44792	3.15833
597.019	2.99167	10.145	6.44167	6.4425	3.05167	3.12333	3.53667	6.44208	3.17583
597.213	2.97833	10.1033	6.40667	6.41667	3.03667	3.11833	3.53	6.41167	3.16583
597.406	2.97	10.0517	6.37667	6.39083	3.02833	3.12	3.52667	6.38375	3.16125
597.599	2.98333	10.0333	6.375	6.38833	3.03833	3.14	3.54833	6.38167	3.1775
597.793	2.97833	9.99	6.345	6.36167	3.035	3.12667	3.54167	6.35333	3.17042
597.986	2.98167	9.94833	6.335	6.35583	3.04333	3.13167	3.55	6.34542	3.17667
598.179	2.95833	9.895	6.29833	6.315	3.02667	3.105	3.53167	6.30667	3.15542
598.373	2.95833	9.85	6.275	6.2975	3.02667	3.09667	3.525	6.28625	3.15167
598.566	2.96167	9.82	6.25833	6.28917	3.03333	3.11167	3.54	6.27375	3.16167
598.759	2.95667	9.79667	6.235	6.275	3.03167	3.11	3.53	6.255	3.15708
598.952	2.96	9.77167	6.22	6.25917	3.03333	3.11167	3.53167	6.23958	3.15917
599.146	2.95667	9.73333	6.19833	6.23917	3.03167	3.1	3.53	6.21875	3.15458
599.339	2.97167	9.71833	6.19333	6.24167	3.05	3.10667	3.53833	6.2175	3.16667
599.532	2.985	9.70333	6.18333	6.23833	3.06	3.11	3.55	6.21083	3.17625
599.725	3	9.685	6.17833	6.2325	3.07333	3.11833	3.55167	6.20542	3.18583
599.918	3.01167	9.66667	6.16833	6.22	3.085	3.12	3.56833	6.19417	3.19625
600.112	3.02	9.64833	6.15	6.20417	3.09167	3.125	3.57333	6.17708	3.2025
600.305	3.045	9.64667	6.16	6.21	3.11333	3.14833	3.59833	6.185	3.22625
600.498	3.04333	9.61333	6.14333	6.19167	3.10333	3.15	3.59333	6.1675	3.2225
600.691	3.04667	9.595	6.13667	6.17583	3.11667	3.14833	3.60167	6.15625	3.22833
600.884	3.04667	9.55833	6.12833	6.1675	3.125	3.155	3.62	6.14792	3.23667
601.077	3.06333	9.52667	6.12167	6.165	3.145	3.16833	3.63333	6.14333	3.2525
601.27	3.07333	9.49667	6.10667	6.14667	3.14833	3.18	3.64	6.12667	3.26042
601.463	3.065	9.45833	6.08	6.12333	3.14167	3.18667	3.64333	6.10167	3.25917
601.656	3.085	9.43333	6.07333	6.11583	3.16667	3.205	3.66333	6.09458	3.28
601.849	3.06667	9.39833	6.04	6.08667	3.15667	3.195	3.67	6.06333	3.27208
602.043	3.065	9.365	6.01833	6.06917	3.14833	3.19667	3.67167	6.04375	3.27042
602.236	3.06667	9.33	5.99667	6.06417	3.14833	3.195	3.68333	6.03042	3.27333
602.429	3.055	9.285	5.955	6.03667	3.145	3.19667	3.68	5.99583	3.26917
602.622	3.06167	9.27833	5.94	6.01667	3.16667	3.21667	3.69667	5.97833	3.28542
602.814	3.05667	9.23833	5.91333	5.98667	3.165	3.21667	3.69167	5.95	3.2825
603.007	3.065	9.21	5.895	5.97	3.17167	3.22333	3.69833	5.9325	3.28958
603.2	3.07667	9.18667	5.88333	5.96917	3.17667	3.235	3.70333	5.92625	3.29792
603.393	3.07833	9.15667	5.87	5.95417	3.18333	3.24333	3.70833	5.91208	3.30333
603.586	3.08167	9.12	5.85333	5.93083	3.18167	3.245	3.715	5.89208	3.30583
603.779	3.05167	9.07333	5.80833	5.87667	3.15667	3.22333	3.7	5.8425	3.28292
603.972	3.06333	9.03833	5.79167	5.8625	3.16167	3.23	3.70667	5.82708	3.29042
604.165	3.06	8.99833	5.77	5.84083	3.16333	3.23667	3.705	5.80542	3.29125
604.358	3.065	8.96833	5.755	5.81083	3.15833	3.25333	3.715	5.78292	3.29792
604.551	3.07	8.925	5.73833	5.78917	3.16	3.255	3.72	5.76375	3.30125
604.744	3.06833	8.87	5.70333	5.76417	3.145	3.24333	3.705	5.73375	3.29042
604.936	3.08	8.83833	5.68333	5.76	3.145	3.24667	3.705	5.72167	3.29417
605.129	3.05167	8.79167	5.63833	5.71167	3.12333	3.23167	3.68333	5.675	3.2725
605.322	3.03333	8.75	5.60667	5.68417	3.11333	3.23333	3.67	5.64542	3.2625
605.515	3.02833	8.72167	5.58167	5.66	3.10833	3.235	3.67667	5.62083	3.26208
605.708	3.03	8.69167	5.55833	5.65333	3.105	3.23	3.675	5.60583	3.26
605.9	3.025	8.65667	5.54167	5.63833	3.1	3.22	3.66333	5.59	3.25208
606.093	3.02167	8.625	5.515	5.6225	3.09333	3.22	3.65333	5.56875	3.24708
606.286	3.02833	8.60667	5.50167	5.61	3.105	3.225	3.66333	5.55583	3.25542
606.478	3.025	8.59167	5.49167	5.61167	3.11667	3.23	3.67333	5.55167	3.26125
606.671	3.03833	8.585	5.48333	5.61	3.135	3.24	3.68667	5.54667	3.275
606.864	3.03833	8.56833	5.47833	5.60333	3.13333	3.24167	3.69667	5.54083	3.2775
607.057	3.03833	8.55833	5.475	5.59583	3.14167	3.24667	3.70833	5.53542	3.28375
607.249	3.06	8.54667	5.475	5.595	3.15667	3.26	3.72667	5.535	3.30083
607.442	3.06167	8.51833	5.46667	5.57833	3.15167	3.25333	3.73333	5.5225	3.3
607.635	3.06833	8.495	5.45167	5.56167	3.15667	3.255	3.73333	5.50667	3.30333
607.827	3.07833	8.47833	5.445	5.5475	3.16667	3.265	3.74833	5.49625	3.31458
608.02	3.10667	8.475	5.45167	5.55833	3.19833	3.3	3.77833	5.505	3.34583
608.212	3.11667	8.46	5.44167	5.55333	3.21333	3.31667	3.80667	5.4975	3.36333
608.405	3.125	8.43667	5.43	5.53583	3.22167	3.32333	3.81333	5.48292	3.37083
608.598	3.115	8.385	5.38167	5.50083	3.20333	3.31167	3.80333	5.44125	3.35833
608.79	3.10833	8.33833	5.35833	5.47417	3.19167	3.30333	3.79833	5.41625	3.35042
608.983	3.12833	8.325	5.34667	5.4525	3.20833	3.325	3.82667	5.39958	3.37208
609.175	3.12833	8.27167	5.32167	5.4325	3.205	3.325	3.83	5.37708	3.37208
609.368	3.14	8.25	5.31167	5.42333	3.22833	3.34833	3.855	5.3675	3.39292
609.56	3.15	8.215	5.29333	5.4125	3.25	3.36333	3.87	5.35292	3.40833
609.753	3.14333	8.17833	5.26333	5.39083	3.245	3.35667	3.87	5.32708	3.40375
609.945	3.15	8.14833	5.24833	5.3775	3.25833	3.375	3.885	5.31292	3.41708
610.138	3.145	8.1	5.22	5.35167	3.255	3.37167	3.88	5.28583	3.41292
610.33	3.155	8.07667	5.215	5.335	3.255	3.37167	3.88167	5.275	3.41583
610.522	3.16167	8.04667	5.20167	5.33167	3.27333	3.385	3.89833	5.26667	3.42958
610.715	3.16833	8.03167	5.20167	5.32667	3.28	3.39667	3.90833	5.26417	3.43833
610.907	3.17	8.01833	5.19	5.3175	3.29167	3.39833	3.92167	5.25375	3.44542
611.1	3.16667	7.98667	5.16833	5.3075	3.295	3.4	3.915	5.23792	3.44417
611.292	3.165	7.96833	5.14667	5.28417	3.295	3.39833	3.915	5.21542	3.44333
611.484	3.16833	7.945	5.13167	5.28083	3.29667	3.40333	3.93167	5.20625	3.45
611.677	3.16	7.92333	5.11	5.26333	3.29	3.40167	3.93167	5.18667	3.44583
611.869	3.17833	7.90833	5.10833	5.26167	3.30333	3.41833	3.94167	5.185	3.46042
612.062	3.17167	7.88	5.08833	5.24083	3.30333	3.40667	3.94833	5.16458	3.4575
612.254	3.17333	7.85667	5.06667	5.22	3.29333	3.40167	3.94833	5.14333	3.45417
612.446	3.18667	7.84167	5.06	5.21083	3.31667	3.42	3.96833	5.13542	3.47292
612.638	3.19333	7.82833	5.045	5.20667	3.315	3.43	3.985	5.12583	3.48083
612.831	3.20333	7.8	5.04667	5.19417	3.33	3.445	3.99333	5.12042	3.49292
613.023	3.20333	7.76667	5.03833	5.18333	3.33333	3.455	3.99833	5.11083	3.4975
613.215	3.20833	7.73833	5.02	5.16333	3.33167	3.45	4.01833	5.09167	3.50208
613.407	3.23333	7.73	5.03167	5.18083	3.36	3.47	4.05167	5.10625	3.52875
613.6	3.23333	7.695	5.01667	5.15583	3.35833	3.46667	4.06	5.08625	3.52958
613.792	3.26333	7.69	5.02167	5.1625	3.37667	3.49	4.10167	5.09208	3.55792
613.984	3.26833	7.66833	5	5.13917	3.37833	3.49333	4.11833	5.06958	3.56458
614.176	3.27833	7.65167	5.005	5.14	3.39333	3.51833	4.12833	5.0725	3.57958
614.368	3.315	7.665	5.02667	5.15333	3.445	3.56167	4.18	5.09	3.62542
614.561	3.30667	7.63	5.01167	5.14333	3.42833	3.55333	4.17833	5.0775	3.61667
614.753	3.3	7.58833	4.99167	5.1125	3.43	3.555	4.17833	5.05208	3.61583
614.945	3.32667	7.58	4.97833	5.10417	3.44333	3.565	4.21667	5.04125	3.63792
615.137	3.34	7.55833	4.96	5.11083	3.45167	3.57833	4.245	5.03542	3.65375
615.329	3.35333	7.54667	4.95667	5.11583	3.46667	3.60667	4.26333	5.03625	3.6725
615.521	3.355	7.515	4.93667	5.085	3.47	3.61	4.26333	5.01083	3.67458
615.713	3.37333	7.515	4.93833	5.08083	3.49833	3.635	4.27833	5.00958	3.69625
615.905	3.37167	7.49333	4.91833	5.0575	3.51	3.63167	4.27667	4.98792	3.6975
616.097	3.385	7.48	4.91333	5.05583	3.535	3.65833	4.29333	4.98458	3.71792
616.289	3.42	7.475	4.91	5.0575	3.57667	3.685	4.33	4.98375	3.75292
616.481	3.39333	7.43	4.87333	5.02417	3.55	3.66667	4.30667	4.94875	3.72917
616.673	3.38833	7.41667	4.86	5.00417	3.56	3.67667	4.31333	4.93208	3.73458
616.865	3.395	7.405	4.84333	4.995	3.57833	3.67333	4.32833	4.91917	3.74375
617.057	3.40833	7.39333	4.84833	4.99083	3.6	3.70333	4.35667	4.91958	3.76708
617.249	3.39167	7.355	4.81167	4.9425	3.585	3.68833	4.335	4.87708	3.75
617.441	3.375	7.31167	4.775	4.89833	3.585	3.675	4.32333	4.83667	3.73958
617.633	3.375	7.29167	4.755	4.88583	3.58333	3.69333	4.32833	4.82042	3.745
617.825	3.35333	7.25	4.72333	4.8725	3.57833	3.68	4.32667	4.79792	3.73458
618.017	3.36	7.21	4.71333	4.855	3.58667	3.68	4.33833	4.78417	3.74125
618.209	3.37	7.18333	4.695	4.83667	3.585	3.67667	4.355	4.76583	3.74667
618.401	3.36667	7.16	4.68667	4.82583	3.58	3.68833	4.36667	4.75625	3.75042
618.593	3.375	7.13167	4.67	4.8125	3.59	3.70833	4.385	4.74125	3.76458
618.784	3.39167	7.10833	4.66167	4.79917	3.60167	3.72667	4.415	4.73042	3.78375
618.976	3.40167	7.08833	4.64833	4.78667	3.62167	3.73667	4.43667	4.7175	3.79917
619.168	3.36333	7.04	4.58833	4.73333	3.59167	3.70667	4.40167	4.66083	3.76583
619.36	3.38667	7.04833	4.60333	4.75167	3.62333	3.74667	4.43667	4.6775	3.79833
619.552	3.41333	7.04333	4.60833	4.76417	3.64833	3.77167	4.47333	4.68625	3.82667
619.743	3.425	7.03167	4.595	4.7625	3.66167	3.785	4.495	4.67875	3.84167
619.935	3.445	7.02333	4.58667	4.75833	3.67667	3.80833	4.51667	4.6725	3.86167
620.127	3.465	7.01833	4.58667	4.76333	3.695	3.83833	4.55667	4.675	3.88875
620.319	3.45	6.98167	4.56	4.75333	3.695	3.85	4.55667	4.65667	3.88792
620.51	3.455	6.95	4.53	4.73167	3.69833	3.85	4.56833	4.63083	3.89292
620.702	3.48	6.93167	4.52333	4.72417	3.705	3.85833	4.59	4.62375	3.90833
620.894	3.49	6.92167	4.51667	4.73833	3.73333	3.87333	4.62	4.6275	3.92917
621.086	3.52	6.91667	4.52333	4.73583	3.735	3.90167	4.64167	4.62958	3.94958
621.277	3.555	6.91333	4.54167	4.7525	3.76833	3.94	4.695	4.64708	3.98958
621.469	3.56	6.87833	4.52167	4.73583	3.78167	3.935	4.71	4.62875	3.99667
621.66	3.57333	6.85333	4.515	4.725	3.79167	3.94833	4.73167	4.62	4.01125
621.852	3.60333	6.85167	4.53833	4.73083	3.83167	3.97833	4.77	4.63458	4.04583
622.044	3.60667	6.82167	4.51167	4.69583	3.83333	3.98833	4.785	4.60375	4.05333
622.235	3.60333	6.78667	4.49333	4.6725	3.82667	3.99333	4.78	4.58292	4.05083
622.427	3.63167	6.77333	4.50333	4.66417	3.84	4.00167	4.81	4.58375	4.07083
622.619	3.64333	6.755	4.49333	4.6525	3.845	4.00833	4.82833	4.57292	4.08125
622.81	3.655	6.74333	4.49333	4.64667	3.87333	4.04167	4.85667	4.57	4.10667
623.002	3.64	6.69833	4.45167	4.60917	3.85833	4.04333	4.85	4.53042	4.09792
623.193	3.635	6.66	4.41833	4.58417	3.85833	4.04333	4.85333	4.50125	4.0975
623.385	3.64167	6.62833	4.39667	4.57	3.865	4.04833	4.86167	4.48333	4.10417
623.576	3.68	6.62333	4.395	4.56417	3.89167	4.07667	4.89333	4.47958	4.13542
623.768	3.70833	6.61833	4.395	4.55333	3.91167	4.10333	4.92	4.47417	4.16083
623.959	3.70667	6.58	4.36167	4.52583	3.91167	4.10667	4.93167	4.44375	4.16417
624.151	3.73	6.56333	4.36167	4.5275	3.93167	4.12167	4.94667	4.44458	4.1825
624.342	3.755	6.555	4.36	4.535	3.96333	4.16167	4.99667	4.4475	4.21917
624.534	3.76	6.54333	4.35	4.5275	3.995	4.18833	5.02	4.43875	4.24083
624.725	3.76167	6.50667	4.33667	4.5075	4.005	4.19833	5.03167	4.42208	4.24917
624.916	3.76	6.47	4.30667	4.49083	3.99833	4.19	5.05	4.39875	4.24958
625.108	3.80167	6.47833	4.32333	4.4975	4.03833	4.22	5.09167	4.41042	4.28792
625.299	3.825	6.46667	4.34	4.49833	4.07667	4.255	5.13833	4.41917	4.32375
625.49	3.84333	6.45667	4.34667	4.49917	4.09833	4.285	5.16833	4.42292	4.34875
625.682	3.84	6.42333	4.33167	4.4825	4.10333	4.29833	5.18167	4.40708	4.35583
625.873	3.86167	6.41833	4.33333	4.49667	4.13167	4.32833	5.23	4.415	4.38792
626.065	3.88167	6.41	4.33	4.48917	4.155	4.355	5.26	4.40958	4.41292
626.256	3.885	6.39667	4.315	4.47333	4.17	4.38	5.28833	4.39417	4.43083
626.447	3.88667	6.37167	4.29667	4.4525	4.175	4.38667	5.29833	4.37458	4.43667
626.638	3.9	6.35333	4.27167	4.44333	4.17667	4.39333	5.31667	4.3575	4.44667
626.83	3.92667	6.34	4.27333	4.43083	4.20167	4.42	5.365	4.35208	4.47833
627.021	3.945	6.33667	4.28	4.43917	4.24333	4.465	5.39167	4.35958	4.51125
627.212	3.955	6.31667	4.26333	4.43417	4.26333	4.495	5.42	4.34875	4.53333
627.403	3.965	6.29333	4.24333	4.41917	4.26167	4.50333	5.425	4.33125	4.53875
627.595	3.99	6.29	4.24	4.41917	4.29	4.53	5.47167	4.32958	4.57042
627.786	4.005	6.275	4.23667	4.4125	4.30667	4.54833	5.49167	4.32458	4.58792
627.977	4	6.24833	4.20667	4.39083	4.31	4.55167	5.49	4.29875	4.58792
628.168	4.01	6.22667	4.19	4.37333	4.325	4.56333	5.51167	4.28167	4.6025
628.359	4.02667	6.20833	4.18167	4.37667	4.35	4.57833	5.53	4.27917	4.62125
628.551	4.04333	6.19667	4.17333	4.38167	4.37833	4.59333	5.55833	4.2775	4.64333
628.742	4.05	6.18333	4.17	4.37333	4.39167	4.605	5.58	4.27167	4.65667
628.933	4.05833	6.17667	4.15	4.3675	4.41167	4.62	5.59167	4.25875	4.67042
629.124	4.09	6.17667	4.155	4.37083	4.44	4.64667	5.635	4.26292	4.70292
629.315	4.11333	6.175	4.14833	4.37	4.46333	4.66667	5.66833	4.25917	4.72792
629.506	4.12167	6.16333	4.14	4.36333	4.49667	4.69167	5.71	4.25167	4.755
629.697	4.11333	6.13333	4.11167	4.33417	4.49167	4.69833	5.71667	4.22292	4.755
629.888	4.12833	6.11667	4.08833	4.31917	4.505	4.71667	5.75333	4.20375	4.77583
630.079	4.15333	6.11	4.09333	4.31833	4.53333	4.74667	5.79833	4.20583	4.80792
630.27	4.17167	6.11	4.095	4.31917	4.56	4.775	5.835	4.20708	4.83542
630.461	4.18833	6.08667	4.08667	4.30417	4.57333	4.795	5.87167	4.19542	4.85708
630.652	4.20833	6.07333	4.075	4.2925	4.595	4.83167	5.91667	4.18375	4.88792
630.843	4.25167	6.07667	4.07667	4.29917	4.63333	4.87167	5.97	4.18792	4.93167
631.034	4.3	6.07833	4.095	4.325	4.67833	4.92	6.02333	4.21	4.98042
631.225	4.305	6.05167	4.075	4.2975	4.69167	4.93167	6.04	4.18625	4.99208
631.416	4.32333	6.02	4.06167	4.29167	4.71	4.94667	6.07333	4.17667	5.01333
631.607	4.38167	6.03	4.08833	4.31167	4.74833	5.00667	6.12167	4.2	5.06458
631.798	4.41833	6.01833	4.08833	4.30667	4.78833	5.03833	6.165	4.1975	5.1025
631.989	4.45833	6.02833	4.09833	4.30917	4.835	5.085	6.20667	4.20375	5.14625
632.18	4.48333	6.01833	4.07833	4.29667	4.84833	5.115	6.23667	4.1875	5.17083
632.371	4.49333	5.99	4.06833	4.285	4.85333	5.13667	6.26333	4.17667	5.18667
632.561	4.545	5.99833	4.08333	4.2975	4.9	5.18667	6.32667	4.19042	5.23958
632.752	4.57833	6.00333	4.08833	4.31083	4.94833	5.225	6.37667	4.19958	5.28208
632.943	4.605	5.98	4.08	4.30833	4.98	5.26833	6.41	4.19417	5.31583
633.134	4.62333	5.96167	4.06333	4.28667	5.01333	5.3	6.45333	4.175	5.3475
633.325	4.65167	5.95833	4.06	4.29417	5.03167	5.33667	6.49333	4.17708	5.37833
633.515	4.69667	5.95	4.06167	4.30583	5.07	5.38833	6.55833	4.18375	5.42833
633.706	4.69833	5.92333	4.04833	4.28167	5.08	5.40833	6.595	4.165	5.44542
633.897	4.72833	5.92667	4.04833	4.28583	5.13	5.46167	6.65667	4.16708	5.49417
634.088	4.75167	5.89833	4.03667	4.27917	5.165	5.48667	6.70667	4.15792	5.5275
634.278	4.76333	5.86333	4.01	4.2575	5.19	5.505	6.735	4.13375	5.54833
634.469	4.80833	5.86	4.00667	4.26167	5.23833	5.55167	6.795	4.13417	5.59833
634.66	4.82333	5.84167	3.985	4.23917	5.26167	5.59333	6.83167	4.11208	5.6275
634.851	4.85333	5.82833	3.98833	4.22583	5.295	5.63333	6.87167	4.10708	5.66333
635.041	4.9	5.83833	4	4.2275	5.34667	5.68833	6.93833	4.11375	5.71833
635.232	4.89333	5.80167	3.96833	4.1925	5.33667	5.69667	6.95667	4.08042	5.72083
635.423	4.93333	5.80333	3.975	4.1875	5.38667	5.73167	7.01833	4.08125	5.7675
635.613	4.94667	5.80333	3.96833	4.17	5.415	5.76167	7.04	4.06917	5.79083
635.804	4.96833	5.78	3.95167	4.14417	5.445	5.78333	7.05833	4.04792	5.81375
635.994	4.98833	5.76333	3.94	4.13917	5.465	5.81833	7.1	4.03958	5.84292
636.185	5.01333	5.74167	3.92833	4.12917	5.485	5.85	7.13833	4.02875	5.87167
636.376	5.07667	5.77167	3.965	4.16833	5.55333	5.925	7.22833	4.06667	5.94583
636.566	5.10333	5.75333	3.96167	4.16417	5.59167	5.96	7.26833	4.06292	5.98083
636.757	5.12667	5.73333	3.95167	4.14833	5.61333	5.97333	7.29667	4.05	6.0025
636.947	5.145	5.705	3.93833	4.14167	5.64167	5.995	7.345	4.04	6.03167
637.138	5.15167	5.67167	3.905	4.12	5.65167	6	7.38167	4.0125	6.04625
637.328	5.20167	5.67667	3.90833	4.14	5.71167	6.05667	7.45	4.02417	6.105
637.519	5.22333	5.64833	3.87833	4.12417	5.74333	6.1	7.49	4.00125	6.13917
637.709	5.275	5.64167	3.88833	4.13833	5.78167	6.165	7.555	4.01333	6.19417
637.9	5.31667	5.63	3.875	4.15	5.83	6.21833	7.62667	4.0125	6.24792
638.09	5.36	5.61667	3.855	4.14167	5.86	6.24667	7.67167	3.99833	6.28458
638.281	5.41	5.62667	3.86167	4.15417	5.92333	6.31	7.74667	4.00792	6.3475
638.471	5.42333	5.57167	3.82333	4.12	5.94	6.325	7.77667	3.97167	6.36625
638.661	5.48	5.59833	3.82833	4.13	5.99333	6.38667	7.86167	3.97917	6.43042
638.852	5.535	5.62167	3.85333	4.17167	6.06333	6.46667	7.95667	4.0125	6.50542
639.042	5.58333	5.62667	3.84667	4.17167	6.105	6.52833	8.01	4.00917	6.55667
639.233	5.64333	5.63333	3.85167	4.18167	6.175	6.585	8.07667	4.01667	6.62
639.423	5.70833	5.64167	3.88333	4.19083	6.235	6.65167	8.155	4.03708	6.6875
639.613	5.77333	5.66	3.91167	4.21167	6.305	6.72	8.24333	4.06167	6.76042
639.804	5.78167	5.63	3.87167	4.17	6.34	6.72667	8.28167	4.02083	6.7825
639.994	5.82167	5.645	3.88833	4.185	6.39333	6.775	8.355	4.03667	6.83625
640.184	5.87667	5.65	3.91	4.22083	6.46333	6.83667	8.435	4.06542	6.90292
640.374	5.93167	5.64833	3.93	4.22417	6.51667	6.89	8.49833	4.07708	6.95917
640.565	5.97667	5.65167	3.92167	4.2275	6.56167	6.935	8.56	4.07458	7.00833
640.755	6.005	5.61667	3.88833	4.195	6.58167	6.955	8.595	4.04167	7.03417
640.945	6.06	5.60833	3.88667	4.20167	6.64833	7.02333	8.65667	4.04417	7.09708
641.135	6.11833	5.61333	3.895	4.21	6.71833	7.07667	8.73167	4.0525	7.16125
641.326	6.16333	5.60833	3.895	4.20833	6.76833	7.13667	8.805	4.05167	7.21833
641.516	6.22333	5.59333	3.88333	4.22417	6.83333	7.19167	8.87667	4.05375	7.28125
641.706	6.26667	5.58167	3.86833	4.2225	6.87833	7.23167	8.93667	4.04542	7.32833
641.896	6.34667	5.59167	3.885	4.25833	6.94833	7.31	9.02833	4.07167	7.40833
642.086	6.41	5.58	3.87	4.25083	6.99333	7.37167	9.09	4.06042	7.46625
642.277	6.46	5.56667	3.87	4.23083	7.045	7.45167	9.15	4.05042	7.52667
642.467	6.50833	5.56667	3.855	4.2275	7.11	7.51333	9.21667	4.04125	7.58708
642.657	6.56333	5.555	3.86	4.22333	7.185	7.58	9.30167	4.04167	7.6575
642.847	6.60667	5.55667	3.87667	4.23917	7.24	7.655	9.37	4.05792	7.71792
643.037	6.65167	5.53167	3.865	4.2175	7.29667	7.69	9.43333	4.04125	7.76792
643.227	6.71	5.53333	3.86833	4.21167	7.35167	7.76167	9.51167	4.04	7.83375
643.417	6.755	5.52167	3.87167	4.20583	7.40333	7.83	9.58667	4.03875	7.89375
643.607	6.79667	5.51333	3.86333	4.17417	7.43833	7.88167	9.635	4.01875	7.93792
643.797	6.84667	5.485	3.85833	4.1525	7.495	7.94333	9.7	4.00542	7.99625
643.987	6.90667	5.48333	3.86333	4.145	7.55	8.005	9.78667	4.00417	8.06208
644.177	6.985	5.48833	3.87833	4.16833	7.645	8.10667	9.89667	4.02333	8.15833
644.367	7.02833	5.48	3.875	4.1675	7.70833	8.165	9.97	4.02125	8.21792
644.557	7.07333	5.465	3.86833	4.14917	7.75667	8.22667	10.035	4.00875	8.27292
644.747	7.13833	5.47167	3.86333	4.14333	7.80667	8.30167	10.1083	4.00333	8.33875
644.937	7.19833	5.44	3.84333	4.13167	7.86	8.35	10.19	3.9875	8.39958
645.127	7.26	5.42	3.82833	4.11083	7.895	8.41667	10.26	3.96958	8.45792
645.317	7.26167	5.36	3.76	4.0625	7.90833	8.44333	10.2883	3.91125	8.47542
645.507	7.31333	5.34667	3.74167	4.04083	7.96667	8.49667	10.35	3.89125	8.53167
645.697	7.37833	5.35	3.74167	4.04583	8.03167	8.57333	10.4583	3.89375	8.61042
645.887	7.41167	5.33	3.70833	4.03167	8.06667	8.625	10.5367	3.87	8.66
646.076	7.48167	5.34667	3.715	4.02833	8.14167	8.71833	10.6183	3.87167	8.74
646.266	7.525	5.32667	3.69167	3.9875	8.18333	8.745	10.6583	3.83958	8.77792
646.456	7.60833	5.35667	3.71	4.01	8.27667	8.845	10.78	3.86	8.8775
646.646	7.68	5.35333	3.69833	4.01333	8.34833	8.92	10.8817	3.85583	8.9575
646.836	7.755	5.34167	3.69333	4.02167	8.43333	8.99833	10.9817	3.8575	9.04208
647.025	7.85167	5.38167	3.72167	4.04833	8.54667	9.10167	11.09	3.885	9.1475
647.215	7.91	5.385	3.71833	4.04083	8.62	9.16833	11.1783	3.87958	9.21917
647.405	8.025	5.43	3.76667	4.07833	8.73667	9.28	11.315	3.9225	9.33917
647.595	8.07667	5.41167	3.765	4.09083	8.79333	9.34833	11.4	3.92792	9.40458
647.784	8.11	5.38667	3.74	4.06833	8.84333	9.39833	11.4583	3.90417	9.4525
647.974	8.20833	5.41	3.75667	4.08167	8.945	9.48333	11.55	3.91917	9.54667
648.164	8.27167	5.39333	3.75333	4.1	9.01	9.565	11.6417	3.92667	9.62208
648.354	8.33333	5.38667	3.75167	4.11167	9.08667	9.65333	11.7317	3.93167	9.70125
648.543	8.38	5.33833	3.71	4.0825	9.125	9.7	11.805	3.89625	9.7525
648.733	8.455	5.345	3.725	4.0975	9.19833	9.78667	11.8967	3.91125	9.83417
648.923	8.535	5.34667	3.735	4.10167	9.285	9.88	11.9983	3.91833	9.92458
649.112	8.575	5.305	3.70333	4.0675	9.33833	9.94333	12.0683	3.88542	9.98125
649.302	8.64167	5.30333	3.69833	4.085	9.42	10.0467	12.1667	3.89167	10.0688
649.491	8.69667	5.26	3.67	4.0625	9.48333	10.1133	12.2267	3.86625	10.13
649.681	8.785	5.26167	3.67667	4.0625	9.57167	10.2067	12.33	3.86958	10.2233
649.871	8.92	5.295	3.72667	4.1075	9.69333	10.3333	12.4633	3.91708	10.3525
650.06	8.97333	5.26667	3.715	4.105	9.775	10.4183	12.5733	3.91	10.435
650.25	9.03167	5.24667	3.68333	4.08667	9.85333	10.485	12.6567	3.885	10.5067
650.439	9.095	5.24	3.66167	4.07583	9.935	10.5467	12.7567	3.86875	10.5833
650.629	9.18	5.25	3.675	4.08833	10.0333	10.6433	12.8567	3.88167	10.6783
650.818	9.27833	5.25833	3.685	4.0925	10.1367	10.7333	12.96	3.88875	10.7771
651.008	9.34833	5.25833	3.68	4.08917	10.215	10.8183	13.0617	3.88458	10.8608
651.197	9.44833	5.27	3.69333	4.12	10.3167	10.915	13.18	3.90667	10.965
651.387	9.53	5.24833	3.675	4.1025	10.3933	10.9933	13.275	3.88875	11.0479
651.576	9.625	5.26833	3.69333	4.12917	10.51	11.095	13.4267	3.91125	11.1642
651.766	9.71333	5.27333	3.69	4.14083	10.61	11.2	13.5483	3.91542	11.2679
651.955	9.77333	5.23833	3.645	4.11917	10.6683	11.2733	13.64	3.88208	11.3387
652.144	9.88333	5.25	3.64333	4.12167	10.7533	11.3833	13.7367	3.8825	11.4392
652.334	9.97833	5.24	3.64167	4.115	10.8317	11.48	13.8367	3.87833	11.5317
652.523	10.0767	5.22833	3.63833	4.125	10.92	11.5917	13.95	3.88167	11.6346
652.713	10.1417	5.195	3.61667	4.09667	10.9833	11.6683	14.045	3.85667	11.7096
[truncated: 1,318 more rows]

## Sheet: SensitivityFunctions
WL	MR1	MR7p	MR7y	MR8p	MR8y	TR1	TR7y	TR8y
300	0.213	0.71	0.219	0.083	0.12	0.213	0.219	0.109
302	0.233	0.737	0.242	0.083	0.124	0.233	0.242	0.112
304	0.253	0.764	0.264	0.083	0.128	0.253	0.264	0.115
306	0.272	0.792	0.287	0.084	0.131	0.272	0.287	0.119
308	0.292	0.819	0.309	0.084	0.135	0.292	0.309	0.122
310	0.312	0.846	0.332	0.084	0.139	0.312	0.332	0.126
312	0.331	0.871	0.356	0.082	0.145	0.331	0.356	0.131
314	0.351	0.901	0.377	0.084	0.147	0.351	0.377	0.133
316	0.37	0.925	0.407	0.084	0.152	0.37	0.407	0.138
318	0.389	0.955	0.433	0.084	0.156	0.389	0.433	0.141
320	0.408	0.972	0.463	0.084	0.16	0.408	0.463	0.145
322	0.444	0.991	0.495	0.084	0.167	0.444	0.495	0.151
324	0.474	1	0.527	0.086	0.177	0.474	0.527	0.16
326	0.521	0.998	0.573	0.086	0.184	0.521	0.573	0.167
328	0.569	0.991	0.613	0.086	0.197	0.569	0.613	0.179
330	0.607	0.983	0.672	0.088	0.209	0.607	0.672	0.189
332	0.652	0.974	0.726	0.088	0.227	0.652	0.726	0.206
334	0.686	0.965	0.79	0.09	0.244	0.686	0.79	0.221
336	0.707	0.954	0.818	0.092	0.242	0.707	0.818	0.219
338	0.72	0.945	0.826	0.094	0.237	0.72	0.826	0.214
340	0.733	0.929	0.824	0.096	0.233	0.733	0.824	0.211
342	0.759	0.905	0.82	0.098	0.241	0.759	0.82	0.218
344	0.822	0.866	0.843	0.096	0.267	0.822	0.843	0.241
346	0.88	0.82	0.871	0.1	0.288	0.88	0.871	0.26
348	0.945	0.771	0.912	0.104	0.31	0.945	0.912	0.28
350	0.992	0.713	0.947	0.108	0.321	0.992	0.947	0.29
352	1	0.681	0.991	0.112	0.318	1	0.991	0.287
354	0.972	0.64	1	0.117	0.303	0.972	1	0.274
356	0.931	0.605	0.985	0.123	0.282	0.931	0.985	0.255
358	0.88	0.562	0.95	0.132	0.26	0.88	0.95	0.235
360	0.849	0.517	0.896	0.138	0.253	0.849	0.896	0.228
362	0.854	0.469	0.851	0.146	0.253	0.854	0.851	0.228
364	0.882	0.42	0.834	0.153	0.268	0.882	0.834	0.242
366	0.909	0.375	0.83	0.163	0.284	0.909	0.83	0.257
368	0.944	0.332	0.851	0.17	0.309	0.944	0.851	0.279
370	0.945	0.293	0.87	0.178	0.314	0.945	0.87	0.284
372	0.855	0.256	0.881	0.185	0.301	0.855	0.881	0.272
374	0.735	0.217	0.877	0.193	0.261	0.735	0.877	0.236
376	0.622	0.191	0.851	0.202	0.22	0.622	0.851	0.205
378	0.521	0.17	0.825	0.212	0.192	0.589	0.825	0.203
380	0.486	0.148	0.771	0.219	0.164	0.584	0.771	0.2
382	0.45	0.12	0.721	0.235	0.134	0.579	0.721	0.204
384	0.42	0.098	0.665	0.255	0.114	0.574	0.665	0.207
386	0.409	0.081	0.624	0.276	0.104	0.568	0.652	0.211
388	0.394	0.062	0.594	0.3	0.095	0.563	0.655	0.215
390	0.381	0.049	0.56	0.319	0.088	0.558	0.658	0.218
392	0.37	0.034	0.54	0.342	0.086	0.552	0.661	0.222
394	0.359	0.025	0.52	0.362	0.086	0.547	0.664	0.225
396	0.35	0.014	0.501	0.385	0.084	0.542	0.668	0.229
398	0.344	0.012	0.49	0.4	0.082	0.537	0.671	0.233
400	0.341	0.008	0.477	0.42	0.083	0.531	0.674	0.236
402	0.337	0.007	0.464	0.439	0.083	0.534	0.673	0.24
404	0.335	0	0.453	0.457	0.085	0.536	0.668	0.237
406	0.333	0	0.443	0.475	0.085	0.538	0.662	0.235
408	0.335	0	0.43	0.496	0.085	0.541	0.657	0.232
410	0.337	0	0.423	0.518	0.083	0.543	0.651	0.229
412	0.345	0	0.41	0.542	0.083	0.545	0.646	0.227
414	0.352	0	0.404	0.562	0.081	0.548	0.641	0.224
416	0.36	0	0.395	0.586	0.081	0.55	0.635	0.221
418	0.371	0	0.388	0.608	0.079	0.558	0.631	0.226
420	0.379	0	0.38	0.632	0.078	0.573	0.627	0.237
422	0.387	0	0.371	0.658	0.078	0.587	0.623	0.248
424	0.402	0	0.364	0.682	0.078	0.601	0.618	0.26
426	0.422	0	0.354	0.705	0.078	0.615	0.614	0.271
428	0.438	0	0.341	0.723	0.078	0.629	0.61	0.282
430	0.454	0	0.334	0.742	0.078	0.644	0.606	0.293
432	0.473	0	0.319	0.762	0.08	0.658	0.602	0.305
434	0.492	0	0.308	0.782	0.08	0.672	0.597	0.316
436	0.505	0	0.293	0.802	0.08	0.686	0.593	0.327
438	0.526	0	0.278	0.821	0.08	0.701	0.589	0.339
440	0.541	0	0.267	0.844	0.08	0.715	0.585	0.35
442	0.556	0	0.249	0.864	0.08	0.724	0.574	0.358
444	0.572	0	0.239	0.884	0.08	0.729	0.562	0.365
446	0.583	0	0.228	0.9	0.082	0.734	0.551	0.373
448	0.594	0	0.217	0.916	0.082	0.739	0.539	0.38
450	0.617	0	0.202	0.931	0.082	0.744	0.528	0.388
452	0.628	0	0.191	0.945	0.084	0.749	0.517	0.395
454	0.639	0	0.178	0.957	0.084	0.754	0.505	0.403
456	0.651	0	0.169	0.97	0.084	0.759	0.494	0.41
458	0.664	0	0.158	0.987	0.085	0.772	0.486	0.431
460	0.675	0	0.148	1	0.086	0.792	0.478	0.451
462	0.687	0	0.143	0.994	0.087	0.812	0.47	0.472
464	0.7	0	0.132	0.989	0.088	0.832	0.462	0.493
466	0.706	0	0.126	0.98	0.092	0.852	0.454	0.514
468	0.713	0	0.117	0.97	0.096	0.864	0.435	0.534
470	0.721	0	0.109	0.948	0.1	0.868	0.416	0.555
472	0.727	0	0.102	0.925	0.104	0.872	0.397	0.576
474	0.73	0	0.097	0.902	0.107	0.875	0.378	0.597
476	0.734	0	0.089	0.873	0.111	0.879	0.359	0.617
478	0.736	0	0.08	0.842	0.117	0.883	0.34	0.638
480	0.736	0	0.074	0.808	0.124	0.887	0.321	0.659
482	0.735	0	0.067	0.782	0.134	0.89	0.302	0.68
484	0.731	0	0.06	0.748	0.141	0.895	0.282	0.698
486	0.729	0	0.056	0.711	0.149	0.9	0.262	0.713
488	0.727	0	0.052	0.666	0.158	0.906	0.242	0.728
490	0.726	0	0.047	0.628	0.166	0.911	0.222	0.744
492	0.722	0	0.043	0.594	0.171	0.916	0.202	0.759
494	0.716	0	0.039	0.567	0.181	0.922	0.182	0.774
496	0.707	0	0.036	0.549	0.188	0.927	0.161	0.789
498	0.696	0	0.032	0.528	0.201	0.932	0.141	0.805
500	0.687	0	0.028	0.498	0.229	0.928	0.122	0.82
502	0.674	0	0.023	0.463	0.259	0.923	0.105	0.835
504	0.67	0	0.019	0.43	0.31	0.918	0.089	0.85
506	0.659	0	0.015	0.403	0.347	0.913	0.075	0.865
508	0.648	0	0.012	0.373	0.414	0.908	0.062	0.88
510	0.637	0	0.006	0.342	0.466	0.903	0.051	0.895
512	0.626	0	0.004	0.311	0.554	0.899	0.04	0.91
514	0.611	0	0.003	0.284	0.642	0.894	0.032	0.925
516	0.599	0	0.001	0.264	0.683	0.889	0.024	0.94
518	0.586	0	0	0.244	0.729	0.884	0.018	0.955
520	0.564	0	0	0.227	0.769	0.879	0.013	0.97
522	0.549	0	0	0.208	0.821	0.875	0.009	0.985
524	0.532	0	0	0.19	0.864	0.865	0.007	1
526	0.517	0	0	0.174	0.91	0.849	0.006	0.995
528	0.501	0	0	0.158	0.946	0.834	0.004	0.99
530	0.49	0	0	0.145	0.976	0.819	0.003	0.985
532	0.475	0	0	0.133	0.994	0.803	0.003	0.98
534	0.458	0	0	0.12	1	0.788	0.002	0.975
536	0.437	0	0	0.107	0.991	0.773	0.002	0.97
538	0.422	0	0	0.094	0.982	0.758	0.001	0.965
540	0.406	0	0	0.084	0.976	0.742	0.001	0.96
542	0.385	0	0	0.074	0.957	0.727	0.001	0.955
544	0.367	0	0	0.066	0.931	0.712	0.001	0.95
546	0.352	0	0	0.058	0.905	0.69	0	0.921
548	0.335	0	0	0.051	0.878	0.667	0	0.891
550	0.318	0	0	0.045	0.848	0.645	0	0.862
552	0.303	0	0	0.04	0.814	0.623	0	0.832
554	0.29	0	0	0.035	0.773	0.6	0	0.803
556	0.273	0	0	0.032	0.736	0.578	0	0.773
558	0.257	0	0	0.029	0.688	0.556	0	0.744
560	0.238	0	0	0.026	0.628	0.534	0	0.714
562	0.225	0	0	0.024	0.589	0.511	0	0.685
564	0.21	0	0	0.02	0.558	0.488	0	0.653
566	0.19	0	0	0.016	0.5	0.465	0	0.618
568	0.175	0	0	0.013	0.468	0.442	0	0.584
570	0.162	0	0	0.007	0.427	0.419	0	0.549
572	0.147	0	0	0.004	0.398	0.396	0	0.515
574	0.13	0	0	0.002	0.359	0.373	0	0.481
576	0.109	0	0	0	0.329	0.35	0	0.446
578	0.096	0	0	0	0.303	0.327	0	0.412
580	0.087	0	0	0	0.279	0.304	0	0.377
582	0.076	0	0	0	0.26	0.281	0	0.347
584	0.067	0	0	0	0.242	0.263	0	0.321
586	0.061	0	0	0	0.223	0.246	0	0.294
588	0.05	0	0	0	0.197	0.229	0	0.268
590	0.048	0	0	0	0.176	0.211	0	0.242
592	0.04	0	0	0	0.155	0.194	0	0.216
594	0.032	0	0	0	0.134	0.176	0	0.189
596	0.024	0	0	0	0.113	0.159	0	0.163
598	0.016	0	0	0	0.092	0.142	0	0.137
600	0.008	0	0	0	0.071	0.125	0	0.111
602	0.006	0	0	0	0.064	0.109	0	0.097
604	0.005	0	0	0	0.057	0.094	0	0.085
606	0.004	0	0	0	0.051	0.079	0	0.074
608	0.003	0	0	0	0.047	0.066	0	0.065
610	0.003	0	0	0	0.042	0.053	0	0.057
612	0.002	0	0	0	0.039	0.042	0	0.049
614	0.002	0	0	0	0.035	0.032	0	0.043
616	0.001	0	0	0	0.033	0.023	0	0.037
618	0.001	0	0	0	0.03	0.016	0	0.032
620	0.001	0	0	0	0.027	0.01	0	0.028
622	0.001	0	0	0	0.025	0.006	0	0.024
624	0.001	0	0	0	0.022	0.003	0	0.02
626	0	0	0	0	0.019	0.002	0	0.017
628	0	0	0	0	0.016	0.002	0	0.014
630	0	0	0	0	0.013	0.001	0	0.012
632	0	0	0	0	0.011	0.001	0	0.01
634	0	0	0	0	0.009	0.001	0	0.008
636	0	0	0	0	0.008	0.001	0	0.007
638	0	0	0	0	0.006	0.001	0	0.006
640	0	0	0	0	0.005	0	0	0.005
642	0	0	0	0	0.004	0	0	0.004
644	0	0	0	0	0.003	0	0	0.003
646	0	0	0	0	0.003	0	0	0.003
648	0	0	0	0	0.002	0	0	0.002
650	0	0	0	0	0.002	0	0	0.002
652	0	0	0	0	0.001	0	0	0.001
654	0	0	0	0	0.001	0	0	0.001
656	0	0	0	0	0.001	0	0	0.001
658	0	0	0	0	0.001	0	0	0.001
660	0	0	0	0	0.001	0	0	0.001
662	0	0	0	0	0	0	0	0
664	0	0	0	0	0	0	0	0
666	0	0	0	0	0	0	0	0
668	0	0	0	0	0	0	0	0
670	0	0	0	0	0	0	0	0
672	0	0	0	0	0	0	0	0
674	0	0	0	0	0	0	0	0
676	0	0	0	0	0	0	0	0
678	0	0	0	0	0	0	0	0
680	0	0	0	0	0	0	0	0
682	0	0	0	0	0	0	0	0
684	0	0	0	0	0	0	0	0
686	0	0	0	0	0	0	0	0
688	0	0	0	0	0	0	0	0
690	0	0	0	0	0	0	0	0
692	0	0	0	0	0	0	0	0
694	0	0	0	0	0	0	0	0
696	0	0	0	0	0	0	0	0
698	0	0	0	0	0	0	0	0
700	0	0	0	0	0	0	0	0

## Sheet: PhotoreceptorExcitations
WL	Violet	TypBlue	VestZF	VestSP23	Violet9%	Violet7%	Violet4.5%	AverageVest	AverageViolet			Musca R1-6 (E)	Musca R7p (E)	Musca R7y (E)	Musca R8p (E)	Musca R8y (E)	Tsetse R1-6 (E)	Tsetse R7y (E)	Tsetse R8y (E)
300	0.036	0.039	0.032	0.038	0.038	0.037	0.038	0.035	0.037		Violet	0.481573	0.499124	0.658719	0.599614	0.253145	0.446994	0.653428	0.352105
302	0.036	0.039	0.032	0.039	0.037	0.037	0.038	0.036	0.037		TypBlue	0.797159	0.747824	0.839663	0.84247	0.670776	0.775862	0.847796	0.737229
304	0.037	0.039	0.032	0.039	0.038	0.037	0.038	0.035	0.037		VestZF	0.746536	0.537157	0.785253	0.807961	0.588951	0.721059	0.806328	0.675262
306	0.038	0.042	0.034	0.04	0.04	0.039	0.04	0.037	0.039		VestSP23	0.745	0.582697	0.793199	0.805618	0.587674	0.719671	0.808723	0.672478
308	0.038	0.043	0.034	0.041	0.04	0.039	0.04	0.038	0.04		Violet9%	0.494042	0.51552	0.667731	0.609905	0.262446	0.458836	0.662417	0.363853
310	0.038	0.043	0.034	0.04	0.039	0.038	0.039	0.037	0.039		Violet7%	0.509761	0.522555	0.681141	0.625871	0.271834	0.474191	0.676668	0.377511
312	0.038	0.045	0.034	0.04	0.039	0.038	0.04	0.037	0.039		Violet4.5%	0.550481	0.562294	0.714113	0.662494	0.303751	0.514509	0.709985	0.416337
314	0.039	0.053	0.034	0.04	0.04	0.039	0.042	0.037	0.04		AverageVest	0.745787	0.560862	0.789314	0.806806	0.588344	0.720387	0.807542	0.673901
316	0.041	0.067	0.035	0.042	0.042	0.041	0.045	0.038	0.042		AverageViolet	0.510389	0.526033	0.681861	0.626071	0.273115	0.474895	0.677118	0.378369
318	0.042	0.083	0.036	0.043	0.043	0.043	0.048	0.039	0.044
320	0.042	0.094	0.036	0.043	0.043	0.044	0.049	0.039	0.045
322	0.042	0.102	0.036	0.043	0.044	0.044	0.05	0.039	0.045
324	0.041	0.107	0.037	0.044	0.044	0.045	0.051	0.04	0.045
326	0.041	0.109	0.036	0.043	0.044	0.044	0.05	0.039	0.045
328	0.041	0.113	0.037	0.044	0.044	0.044	0.051	0.04	0.045
330	0.042	0.114	0.037	0.045	0.044	0.044	0.051	0.041	0.045
332	0.043	0.117	0.039	0.046	0.045	0.045	0.051	0.042	0.046
334	0.042	0.119	0.039	0.047	0.045	0.046	0.052	0.043	0.046
336	0.043	0.121	0.04	0.048	0.045	0.047	0.053	0.044	0.047
338	0.041	0.121	0.04	0.047	0.044	0.045	0.052	0.044	0.045
340	0.042	0.123	0.041	0.049	0.045	0.045	0.053	0.045	0.046
342	0.042	0.125	0.041	0.05	0.045	0.046	0.053	0.046	0.047
344	0.043	0.128	0.042	0.052	0.046	0.047	0.055	0.047	0.047
346	0.044	0.132	0.044	0.054	0.047	0.048	0.056	0.049	0.049
348	0.045	0.134	0.046	0.056	0.048	0.049	0.057	0.051	0.05
350	0.047	0.14	0.05	0.06	0.05	0.052	0.061	0.055	0.053
352	0.048	0.145	0.051	0.063	0.051	0.053	0.063	0.057	0.054
354	0.048	0.149	0.052	0.064	0.051	0.053	0.063	0.058	0.054
356	0.05	0.155	0.056	0.068	0.054	0.056	0.067	0.062	0.057
358	0.053	0.162	0.06	0.073	0.056	0.058	0.07	0.066	0.059
360	0.053	0.167	0.062	0.076	0.057	0.059	0.072	0.069	0.06
362	0.053	0.174	0.066	0.081	0.057	0.06	0.073	0.073	0.061
364	0.055	0.181	0.071	0.086	0.06	0.063	0.076	0.079	0.063
366	0.057	0.189	0.076	0.093	0.062	0.064	0.078	0.085	0.065
368	0.058	0.198	0.083	0.101	0.063	0.066	0.08	0.092	0.067
370	0.06	0.207	0.09	0.109	0.065	0.068	0.082	0.1	0.069
372	0.061	0.216	0.098	0.118	0.066	0.069	0.084	0.108	0.07
374	0.063	0.225	0.107	0.129	0.068	0.072	0.087	0.118	0.073
376	0.064	0.233	0.116	0.139	0.07	0.074	0.089	0.127	0.074
378	0.067	0.243	0.126	0.151	0.072	0.076	0.093	0.139	0.077
380	0.069	0.252	0.136	0.162	0.076	0.079	0.096	0.149	0.08
382	0.072	0.262	0.147	0.174	0.078	0.083	0.1	0.161	0.083
384	0.075	0.271	0.158	0.186	0.082	0.087	0.105	0.172	0.087
386	0.08	0.281	0.171	0.2	0.087	0.092	0.112	0.185	0.093
388	0.084	0.29	0.182	0.211	0.091	0.097	0.117	0.196	0.097
390	0.09	0.299	0.193	0.223	0.097	0.103	0.124	0.208	0.103
392	0.096	0.309	0.204	0.234	0.103	0.11	0.132	0.219	0.11
394	0.103	0.318	0.216	0.246	0.111	0.118	0.141	0.231	0.118
396	0.112	0.328	0.227	0.257	0.12	0.127	0.151	0.242	0.127
398	0.121	0.337	0.237	0.267	0.128	0.136	0.161	0.252	0.137
400	0.132	0.347	0.249	0.278	0.139	0.148	0.175	0.263	0.149
402	0.143	0.357	0.259	0.287	0.151	0.16	0.188	0.273	0.161
404	0.155	0.366	0.269	0.297	0.163	0.172	0.202	0.283	0.173
406	0.167	0.375	0.279	0.305	0.174	0.185	0.215	0.292	0.185
408	0.177	0.382	0.287	0.312	0.183	0.195	0.226	0.3	0.195
410	0.186	0.39	0.296	0.32	0.192	0.204	0.236	0.308	0.204
412	0.193	0.398	0.303	0.326	0.198	0.211	0.244	0.315	0.211
414	0.198	0.405	0.311	0.333	0.203	0.217	0.25	0.322	0.217
416	0.204	0.412	0.318	0.339	0.209	0.223	0.256	0.329	0.223
418	0.211	0.418	0.325	0.344	0.215	0.229	0.263	0.335	0.23
420	0.219	0.426	0.333	0.35	0.223	0.238	0.273	0.342	0.238
422	0.228	0.432	0.34	0.355	0.231	0.247	0.283	0.348	0.247
424	0.237	0.438	0.346	0.36	0.239	0.255	0.292	0.353	0.256
426	0.245	0.444	0.353	0.365	0.246	0.264	0.302	0.359	0.264
428	0.251	0.45	0.358	0.369	0.251	0.268	0.307	0.364	0.269
430	0.252	0.455	0.364	0.373	0.252	0.27	0.309	0.368	0.271
432	0.25	0.458	0.368	0.375	0.25	0.269	0.308	0.371	0.269
434	0.245	0.462	0.371	0.377	0.247	0.264	0.303	0.374	0.265
436	0.239	0.466	0.375	0.379	0.241	0.259	0.298	0.377	0.259
438	0.232	0.471	0.381	0.383	0.235	0.253	0.29	0.382	0.252
440	0.223	0.478	0.387	0.387	0.227	0.244	0.281	0.387	0.244
442	0.214	0.486	0.395	0.392	0.219	0.234	0.271	0.393	0.235
444	0.206	0.495	0.403	0.398	0.211	0.227	0.263	0.4	0.227
446	0.197	0.506	0.413	0.405	0.202	0.217	0.252	0.409	0.217
448	0.187	0.516	0.422	0.411	0.193	0.208	0.242	0.417	0.208
450	0.179	0.524	0.43	0.416	0.186	0.2	0.233	0.423	0.2
452	0.171	0.534	0.44	0.422	0.179	0.192	0.224	0.431	0.191
454	0.162	0.543	0.447	0.427	0.17	0.182	0.214	0.437	0.182
456	0.155	0.549	0.453	0.43	0.163	0.174	0.205	0.441	0.174
458	0.147	0.554	0.457	0.433	0.155	0.167	0.197	0.445	0.166
460	0.139	0.557	0.459	0.434	0.148	0.158	0.187	0.446	0.158
462	0.132	0.557	0.459	0.433	0.14	0.15	0.178	0.446	0.15
464	0.126	0.557	0.458	0.431	0.134	0.144	0.172	0.445	0.144
466	0.119	0.555	0.455	0.428	0.128	0.137	0.164	0.442	0.137
468	0.113	0.551	0.45	0.424	0.121	0.13	0.155	0.437	0.13
470	0.107	0.547	0.445	0.419	0.115	0.124	0.148	0.432	0.124
472	0.101	0.542	0.439	0.415	0.11	0.118	0.141	0.427	0.117
474	0.096	0.535	0.432	0.409	0.104	0.111	0.134	0.42	0.111
476	0.09	0.529	0.424	0.403	0.098	0.105	0.127	0.414	0.105
478	0.085	0.521	0.416	0.398	0.093	0.099	0.121	0.407	0.099
480	0.081	0.514	0.408	0.392	0.088	0.094	0.115	0.4	0.095
482	0.077	0.506	0.4	0.386	0.083	0.09	0.109	0.393	0.09
484	0.072	0.497	0.39	0.379	0.079	0.085	0.103	0.384	0.085
486	0.069	0.495	0.387	0.377	0.076	0.081	0.099	0.382	0.081
488	0.066	0.483	0.376	0.368	0.072	0.078	0.095	0.372	0.078
490	0.063	0.475	0.368	0.361	0.069	0.074	0.09	0.364	0.074
492	0.06	0.465	0.358	0.353	0.066	0.071	0.086	0.356	0.071
494	0.057	0.457	0.35	0.346	0.063	0.067	0.082	0.348	0.068
496	0.055	0.448	0.342	0.339	0.061	0.065	0.08	0.341	0.065
498	0.053	0.438	0.332	0.33	0.058	0.062	0.075	0.331	0.062
500	0.051	0.43	0.324	0.322	0.056	0.059	0.072	0.323	0.06
502	0.049	0.421	0.317	0.314	0.053	0.057	0.069	0.316	0.057
504	0.047	0.412	0.308	0.306	0.051	0.054	0.066	0.307	0.055
506	0.045	0.402	0.299	0.298	0.049	0.052	0.063	0.299	0.052
508	0.043	0.393	0.291	0.29	0.047	0.05	0.06	0.29	0.05
510	0.042	0.384	0.282	0.281	0.045	0.048	0.058	0.282	0.048
512	0.04	0.376	0.275	0.273	0.043	0.046	0.055	0.274	0.046
514	0.039	0.367	0.267	0.265	0.042	0.044	0.053	0.266	0.045
516	0.038	0.358	0.259	0.258	0.041	0.043	0.052	0.259	0.043
518	0.037	0.349	0.251	0.25	0.04	0.041	0.05	0.25	0.042
520	0.036	0.34	0.243	0.242	0.039	0.041	0.048	0.243	0.041
522	0.036	0.333	0.237	0.236	0.038	0.04	0.047	0.237	0.04
524	0.035	0.324	0.23	0.229	0.037	0.039	0.046	0.229	0.039
526	0.034	0.315	0.222	0.22	0.036	0.038	0.045	0.221	0.038
528	0.034	0.307	0.215	0.213	0.036	0.037	0.043	0.214	0.037
530	0.033	0.3	0.209	0.207	0.035	0.036	0.042	0.208	0.037
532	0.033	0.294	0.204	0.202	0.035	0.036	0.042	0.203	0.036
534	0.032	0.283	0.196	0.194	0.034	0.035	0.041	0.195	0.035
536	0.032	0.277	0.191	0.189	0.033	0.035	0.04	0.19	0.035
538	0.031	0.268	0.184	0.181	0.033	0.034	0.039	0.182	0.034
540	0.031	0.261	0.179	0.176	0.032	0.034	0.039	0.178	0.034
542	0.03	0.251	0.17	0.168	0.032	0.033	0.038	0.169	0.033
544	0.03	0.246	0.166	0.164	0.031	0.032	0.037	0.165	0.033
546	0.03	0.239	0.161	0.159	0.031	0.032	0.036	0.16	0.032
548	0.03	0.23	0.154	0.152	0.031	0.032	0.036	0.153	0.032
550	0.03	0.224	0.15	0.148	0.03	0.031	0.036	0.149	0.032
552	0.03	0.217	0.145	0.143	0.031	0.031	0.036	0.144	0.032
554	0.029	0.209	0.138	0.137	0.03	0.031	0.035	0.138	0.031
556	0.03	0.203	0.134	0.133	0.03	0.031	0.035	0.133	0.031
558	0.03	0.196	0.129	0.127	0.03	0.031	0.035	0.128	0.031
560	0.03	0.19	0.125	0.123	0.03	0.031	0.035	0.124	0.032
562	0.029	0.183	0.12	0.118	0.03	0.03	0.034	0.119	0.031
564	0.029	0.177	0.115	0.113	0.03	0.03	0.034	0.114	0.031
566	0.029	0.17	0.11	0.108	0.03	0.03	0.034	0.109	0.031
568	0.029	0.165	0.106	0.104	0.03	0.031	0.034	0.105	0.031
570	0.029	0.16	0.103	0.101	0.03	0.031	0.034	0.102	0.031
572	0.03	0.154	0.099	0.097	0.03	0.03	0.034	0.098	0.031
574	0.029	0.148	0.095	0.093	0.03	0.031	0.034	0.094	0.031
576	0.029	0.144	0.092	0.09	0.03	0.031	0.034	0.091	0.031
578	0.029	0.139	0.089	0.087	0.03	0.031	0.034	0.088	0.031
580	0.03	0.135	0.087	0.084	0.03	0.031	0.035	0.086	0.031
582	0.03	0.131	0.084	0.082	0.03	0.031	0.035	0.083	0.031
584	0.03	0.127	0.081	0.079	0.03	0.031	0.035	0.08	0.032
586	0.03	0.122	0.078	0.077	0.031	0.031	0.035	0.078	0.032
588	0.03	0.118	0.075	0.074	0.031	0.031	0.035	0.075	0.032
590	0.03	0.114	0.073	0.072	0.031	0.031	0.035	0.072	0.032
592	0.03	0.111	0.071	0.07	0.03	0.031	0.035	0.07	0.032
594	0.03	0.107	0.068	0.068	0.031	0.031	0.035	0.068	0.032
596	0.029	0.103	0.065	0.065	0.03	0.031	0.035	0.065	0.031
598	0.03	0.099	0.063	0.064	0.03	0.031	0.035	0.063	0.032
600	0.03	0.097	0.062	0.062	0.031	0.031	0.036	0.062	0.032
602	0.031	0.094	0.06	0.061	0.032	0.032	0.037	0.06	0.033
604	0.031	0.09	0.058	0.059	0.032	0.032	0.037	0.058	0.033
606	0.03	0.086	0.055	0.056	0.031	0.032	0.037	0.056	0.032
608	0.031	0.085	0.055	0.056	0.032	0.033	0.038	0.055	0.033
610	0.031	0.081	0.052	0.054	0.033	0.034	0.039	0.053	0.034
612	0.032	0.079	0.051	0.052	0.033	0.034	0.039	0.052	0.035
614	0.033	0.077	0.05	0.051	0.034	0.035	0.041	0.051	0.036
616	0.034	0.075	0.049	0.051	0.035	0.036	0.043	0.05	0.037
618	0.034	0.072	0.047	0.049	0.036	0.037	0.043	0.048	0.037
620	0.035	0.07	0.046	0.048	0.037	0.038	0.045	0.047	0.039
622	0.036	0.068	0.045	0.047	0.038	0.04	0.048	0.046	0.041
624	0.037	0.066	0.044	0.045	0.039	0.041	0.049	0.044	0.042
626	0.039	0.064	0.043	0.045	0.041	0.043	0.052	0.044	0.044
628	0.04	0.062	0.042	0.044	0.043	0.046	0.055	0.043	0.046
630	0.041	0.061	0.041	0.043	0.045	0.047	0.058	0.042	0.048
632	0.045	0.06	0.041	0.043	0.048	0.051	0.062	0.042	0.051
634	0.047	0.059	0.04	0.043	0.051	0.055	0.067	0.042	0.055
636	0.05	0.058	0.039	0.041	0.055	0.058	0.071	0.04	0.058
638	0.053	0.056	0.039	0.041	0.058	0.062	0.077	0.04	0.063
640	0.058	0.056	0.039	0.042	0.064	0.068	0.084	0.04	0.068
642	0.064	0.056	0.039	0.043	0.07	0.073	0.091	0.041	0.074
644	0.069	0.055	0.039	0.041	0.076	0.08	0.098	0.04	0.081
646	0.075	0.053	0.037	0.04	0.081	0.087	0.106	0.039	0.087
648	0.082	0.054	0.038	0.041	0.09	0.095	0.116	0.039	0.096
650	0.09	0.053	0.037	0.041	0.097	0.104	0.125	0.039	0.104
652	0.098	0.052	0.036	0.041	0.107	0.113	0.137	0.039	0.114
654	0.107	0.051	0.035	0.04	0.115	0.123	0.147	0.038	0.123
656	0.118	0.051	0.035	0.04	0.126	0.134	0.16	0.038	0.135
658	0.131	0.051	0.036	0.042	0.14	0.148	0.175	0.039	0.148
660	0.143	0.05	0.036	0.041	0.152	0.161	0.189	0.038	0.161
662	0.154	0.049	0.036	0.04	0.164	0.173	0.202	0.038	0.173
664	0.169	0.049	0.035	0.04	0.178	0.188	0.219	0.037	0.189
666	0.186	0.049	0.035	0.041	0.195	0.206	0.238	0.038	0.206
668	0.203	0.049	0.035	0.04	0.211	0.222	0.254	0.037	0.223
670	0.219	0.047	0.034	0.039	0.227	0.24	0.273	0.037	0.24
672	0.238	0.048	0.034	0.041	0.244	0.257	0.292	0.038	0.258
674	0.256	0.047	0.034	0.039	0.262	0.276	0.312	0.037	0.277
676	0.276	0.047	0.034	0.04	0.281	0.295	0.332	0.037	0.296
678	0.296	0.046	0.034	0.039	0.301	0.315	0.352	0.036	0.316
680	0.317	0.046	0.034	0.039	0.321	0.335	0.374	0.036	0.337
682	0.338	0.046	0.034	0.038	0.34	0.354	0.393	0.036	0.356
684	0.359	0.047	0.034	0.04	0.36	0.375	0.414	0.037	0.377
686	0.382	0.047	0.034	0.04	0.381	0.399	0.438	0.037	0.4
688	0.406	0.047	0.034	0.04	0.403	0.42	0.46	0.037	0.422
690	0.429	0.047	0.034	0.039	0.423	0.441	0.481	0.037	0.443
692	0.452	0.047	0.034	0.04	0.445	0.462	0.503	0.037	0.465
694	0.477	0.05	0.037	0.043	0.467	0.485	0.525	0.04	0.489
696	0.5	0.05	0.036	0.042	0.488	0.507	0.547	0.039	0.511
698	0.523	0.049	0.035	0.041	0.509	0.528	0.569	0.038	0.532
700	0.545	0.051	0.036	0.042	0.528	0.548	0.587	0.039	0.552

## Sheet: LindhEtAl2012Data
expt	colour	maleIndex	femaleIndex	maleActual	femaleActual	MR1	MR7p	MR7y	MR8p	MR8y	TR1	TR7y	TR8y
1	standard	100	100	157	137	0.627885	0.430255	0.666612	0.714887	0.395764	0.589468	0.704959	0.525206
1	brown	84	84	143	125	0.311201	0.587083	0.45606	0.314021	0.243759	0.292668	0.40024	0.258976
1	red2	75	67	128	93	0.276736	0.552385	0.462009	0.298599	0.198387	0.261933	0.403363	0.218751
1	red1	44	68	75	90	0.264797	0.510315	0.403807	0.279153	0.229881	0.265841	0.3573	0.242669
1	orange	72	55	121	81	0.451643	0.714892	0.571398	0.409186	0.491721	0.483591	0.50973	0.482795
2	standard	100	100	148	193	0.627885	0.430255	0.666612	0.714887	0.395764	0.589468	0.704959	0.525206
2	white3	44	30	67	61	0.898735	0.870893	0.91791	0.913513	0.869734	0.89396	0.91843	0.883966
2	yellow2	53	32	76	65	0.870653	0.851474	0.873251	0.868532	0.861964	0.869259	0.869422	0.867759
2	yellow1	39	32	59	63	0.7604	0.854391	0.758402	0.701522	0.801935	0.774817	0.724362	0.787776
2	orange	46	35	68	68	0.451643	0.714892	0.571398	0.409186	0.491721	0.483591	0.50973	0.482795
3	standard	100	100	240	281	0.627885	0.430255	0.666612	0.714887	0.395764	0.589468	0.704959	0.525206
3	green1	43	38	106	108	0.729464	0.830169	0.758924	0.698631	0.742161	0.731419	0.728793	0.733911
3	green2	67	41	165	158	0.62395	0.469844	0.541311	0.624311	0.595182	0.611742	0.574838	0.61123
3	green3	48	42	121	149	0.486209	0.710888	0.568945	0.450286	0.473398	0.478704	0.514814	0.46893
3	purple1	85	47	210	176	0.642259	0.735779	0.765698	0.720126	0.440043	0.608982	0.758525	0.531564
4	standard	100	100	184	289	0.627885	0.430255	0.666612	0.714887	0.395764	0.589468	0.704959	0.525206
4	blue10	49	51	96	147	0.715352	0.726219	0.774184	0.773368	0.553536	0.686426	0.782495	0.635608
4	blue12	69	48	135	144	0.731219	0.750954	0.795437	0.787018	0.570073	0.703021	0.799831	0.651332
4	green2	54	55	118	162	0.62395	0.469844	0.541311	0.624311	0.595182	0.611742	0.574838	0.61123
4	orange	52	42	96	125	0.451643	0.714892	0.571398	0.409186	0.491721	0.483591	0.50973	0.482795
5	standard	100	100	177	259	0.627885	0.430255	0.666612	0.714887	0.395764	0.589468	0.704959	0.525206
5	brown	75	54	146	136	0.311201	0.587083	0.45606	0.314021	0.243759	0.292668	0.40024	0.258976
5	red1	55	42	92	122	0.264797	0.510315	0.403807	0.279153	0.229881	0.265841	0.3573	0.242669
5	black1	65	35	112	94	0.201038	0.416396	0.315448	0.215145	0.144104	0.185957	0.276171	0.159254
5	purple1	82	43	142	113	0.642259	0.735779	0.765698	0.720126	0.440043	0.608982	0.758525	0.531564
6	standard	100	100	228	189	0.627885	0.430255	0.666612	0.714887	0.395764	0.589468	0.704959	0.525206
6	black1	55	57	116	108	0.201038	0.416396	0.315448	0.215145	0.144104	0.185957	0.276171	0.159254
6	grey1	30	35	63	64	0.763514	0.859212	0.831206	0.788039	0.677542	0.745378	0.817097	0.712972
6	grey2	36	38	78	72	0.582154	0.782797	0.709337	0.599301	0.482321	0.557381	0.66994	0.512976
6	white2	32	31	71	62	0.889943	0.678007	0.893767	0.909172	0.860571	0.885671	0.90521	0.877249
7	standard	100	100	123	165	0.627885	0.430255	0.666612	0.714887	0.395764	0.589468	0.704959	0.525206
7	white2	58	71	83	138	0.889943	0.678007	0.893767	0.909172	0.860571	0.885671	0.90521	0.877249
7	white1	82	45	106	82	0.90547	0.94668	0.935607	0.914647	0.874288	0.899143	0.928788	0.886395
7	grey1	50	45	59	73	0.763514	0.859212	0.831206	0.788039	0.677542	0.745378	0.817097	0.712972
7	black2	85	85	104	138	0.244607	0.500562	0.383189	0.25941	0.171609	0.224732	0.335298	0.190283
8	standard	100	100	216	208	0.627885	0.430255	0.666612	0.714887	0.395764	0.589468	0.704959	0.525206
8	black1	49	47	105	105	0.201038	0.416396	0.315448	0.215145	0.144104	0.185957	0.276171	0.159254
8	blue7	51	42	112	90	0.762667	0.681332	0.811512	0.822122	0.589017	0.73525	0.825671	0.683863
8	blue8	48	49	104	104	0.619242	0.723477	0.768164	0.698115	0.391767	0.582272	0.751585	0.493462
8	black2	40	35	85	79	0.244607	0.500562	0.383189	0.25941	0.171609	0.224732	0.335298	0.190283
9	standard	100	100	130	166	0.627885	0.430255	0.666612	0.714887	0.395764	0.589468	0.704959	0.525206
9	blue7	68	60	85	94	0.762667	0.681332	0.811512	0.822122	0.589017	0.73525	0.825671	0.683863
9	blue9	62	58	76	94	0.791027	0.734013	0.837382	0.840226	0.652487	0.768422	0.846156	0.725959
9	blue12	66	61	85	100	0.731219	0.750954	0.795437	0.787018	0.570073	0.703021	0.799831	0.651332
9	blue13	56	57	72	101	0.703734	0.719385	0.767884	0.766718	0.523359	0.672033	0.776722	0.61536
10	standard	100	100	157	205	0.627885	0.430255	0.666612	0.714887	0.395764	0.589468	0.704959	0.525206
10	blue8	62	51	112	105	0.619242	0.723477	0.768164	0.698115	0.391767	0.582272	0.751585	0.493462
10	blue2	47	38	82	82	0.660595	0.788739	0.807784	0.730637	0.436834	0.62428	0.787882	0.533366
10	blue3	47	46	76	99	0.726868	0.818065	0.836043	0.783439	0.54061	0.696078	0.82288	0.625357
10	blue4	41	34	70	73	0.817349	0.856798	0.888643	0.85646	0.691466	0.797236	0.880971	0.750823
11	standard	100	100	215	308	0.627885	0.430255	0.666612	0.714887	0.395764	0.589468	0.704959	0.525206
11	blue4	39	41	86	137	0.817349	0.856798	0.888643	0.85646	0.691466	0.797236	0.880971	0.750823
11	blue5	31	29	70	89	0.784806	0.86429	0.867632	0.815658	0.681081	0.765695	0.852086	0.72385
11	purple2	69	55	162	188	0.647206	0.682008	0.787249	0.738981	0.41295	0.614308	0.780847	0.523572
11	blue9	36	36	82	112	0.791027	0.734013	0.837382	0.840226	0.652487	0.768422	0.846156	0.725959
12	standard	100	100	253	204	0.627885	0.430255	0.666612	0.714887	0.395764	0.589468	0.704959	0.525206
12	blue11	23	35	68	71	0.781741	0.800768	0.833224	0.82394	0.663283	0.760465	0.835257	0.721867
12	blue10	25	37	78	83	0.715352	0.726219	0.774184	0.773368	0.553536	0.686426	0.782495	0.635608
12	blue6	44	32	119	75	0.627633	0.777839	0.781321	0.69749	0.398967	0.587966	0.758702	0.495822
12	purple2	80	77	204	159	0.647206	0.682008	0.787249	0.738981	0.41295	0.614308	0.780847	0.523572
13	standard	100	100	206	258	0.627885	0.430255	0.666612	0.714887	0.395764	0.589468	0.704959	0.525206
13	purple1	51	45	108	119	0.642259	0.735779	0.765698	0.720126	0.440043	0.608982	0.758525	0.531564
13	purple2	63	67	140	191	0.647206	0.682008	0.787249	0.738981	0.41295	0.614308	0.780847	0.523572
13	blue7(1)	48	42	98	107	0.762667	0.681332	0.811512	0.822122	0.589017	0.73525	0.825671	0.683863
13	blue7(3)	34	35	71	90	0.762667	0.681332	0.811512	0.822122	0.589017	0.73525	0.825671	0.683863
14	standard	100	100	168	263	0.627885	0.430255	0.666612	0.714887	0.395764	0.589468	0.704959	0.525206
14	purple4	73	62	124	161	0.627372	0.836242	0.820082	0.676509	0.445547	0.596346	0.780876	0.501635
14	purple5	81	52	131	131	0.642759	0.783261	0.814273	0.711218	0.456646	0.614915	0.787281	0.527101
14	purple8	74	59	117	142	0.616082	0.754497	0.760785	0.678748	0.446039	0.585542	0.738304	0.514067
14	purple2	73	58	127	139	0.647206	0.682008	0.787249	0.738981	0.41295	0.614308	0.780847	0.523572
15	standard	100	100	233	318	0.627885	0.430255	0.666612	0.714887	0.395764	0.589468	0.704959	0.525206
15	purple3	54	50	136	175	0.379263	0.713917	0.624729	0.404477	0.229555	0.34318	0.553518	0.262183
15	purple6	44	46	106	159	0.456357	0.752311	0.683798	0.487168	0.300113	0.420973	0.622008	0.338413
15	purple7	50	52	146	196	0.40428	0.670025	0.646813	0.443625	0.261515	0.375217	0.58293	0.29705
15	purple1	56	48	157	165	0.642259	0.735779	0.765698	0.720126	0.440043	0.608982	0.758525	0.531564

## Sheet: KenyaExcitations
expt	repCont	dayCont	siteCont	fabric	MR1	MR7p	MR7y	MR8p	MR8y	TR1	TR7y	TR8y	net_males	fabric_males	net_females	fabric_females	males	females	total
1	1	1	1	TypBlue	0.797159	0.747824	0.839663	0.84247	0.670776	0.775862	0.847796	0.737229	19	6	32	5	25	37	62
1	2	1	2	VestZF	0.746536	0.537157	0.785253	0.807961	0.588951	0.721059	0.806328	0.675262	10	3	17	3	13	20	33
1	3	1	3	VestSP23	0.745	0.582697	0.793199	0.805618	0.587674	0.719671	0.808723	0.672478	31	17	38	3	48	41	89
1	4	1	4	Violet	0.481573	0.499124	0.658719	0.599614	0.253145	0.446994	0.653428	0.352105	5	4	24	1	9	25	34
1	5	2	1	Violet	0.481573	0.499124	0.658719	0.599614	0.253145	0.446994	0.653428	0.352105	12	9	26	5	21	31	52
1	6	2	2	VestSP23	0.745	0.582697	0.793199	0.805618	0.587674	0.719671	0.808723	0.672478	14	0	19	2	14	21	35
1	7	2	3	VestZF	0.746536	0.537157	0.785253	0.807961	0.588951	0.721059	0.806328	0.675262	27	8	46	5	35	51	86
1	8	2	4	TypBlue	0.797159	0.747824	0.839663	0.84247	0.670776	0.775862	0.847796	0.737229	5	0	8	1	5	9	14
1	9	3	1	VestZF	0.746536	0.537157	0.785253	0.807961	0.588951	0.721059	0.806328	0.675262	13	4	21	6	17	27	44
1	10	3	2	Violet	0.481573	0.499124	0.658719	0.599614	0.253145	0.446994	0.653428	0.352105	10	0	17	2	10	19	29
1	11	3	3	TypBlue	0.797159	0.747824	0.839663	0.84247	0.670776	0.775862	0.847796	0.737229	19	6	14	12	25	26	51
1	12	3	4	VestSP23	0.745	0.582697	0.793199	0.805618	0.587674	0.719671	0.808723	0.672478	3	2	8	4	5	12	17
1	13	4	1	VestSP23	0.745	0.582697	0.793199	0.805618	0.587674	0.719671	0.808723	0.672478	10	1	24	4	11	28	39
1	14	4	2	TypBlue	0.797159	0.747824	0.839663	0.84247	0.670776	0.775862	0.847796	0.737229	2	2	12	2	4	14	18
1	15	4	3	Violet	0.481573	0.499124	0.658719	0.599614	0.253145	0.446994	0.653428	0.352105	16	2	51	7	18	58	76
1	16	4	4	VestZF	0.746536	0.537157	0.785253	0.807961	0.588951	0.721059	0.806328	0.675262	4	0	22	2	4	24	28
1	17	5	1	Violet	0.481573	0.499124	0.658719	0.599614	0.253145	0.446994	0.653428	0.352105	9	4	16	3	13	19	32
1	18	5	2	VestSP23	0.745	0.582697	0.793199	0.805618	0.587674	0.719671	0.808723	0.672478	11	2	27	3	13	30	43
1	19	5	3	TypBlue	0.797159	0.747824	0.839663	0.84247	0.670776	0.775862	0.847796	0.737229	17	0	19	3	17	22	39
1	20	5	4	VestZF	0.746536	0.537157	0.785253	0.807961	0.588951	0.721059	0.806328	0.675262	12	0	23	1	12	24	36
1	21	6	1	TypBlue	0.797159	0.747824	0.839663	0.84247	0.670776	0.775862	0.847796	0.737229	13	1	13	0	14	13	27
1	22	6	2	VestZF	0.746536	0.537157	0.785253	0.807961	0.588951	0.721059	0.806328	0.675262	9	1	20	0	10	20	30
1	23	6	3	Violet	0.481573	0.499124	0.658719	0.599614	0.253145	0.446994	0.653428	0.352105	19	1	22	3	20	25	45
1	24	6	4	VestSP23	0.745	0.582697	0.793199	0.805618	0.587674	0.719671	0.808723	0.672478	8	0	17	0	8	17	25
1	25	7	1	VestZF	0.746536	0.537157	0.785253	0.807961	0.588951	0.721059	0.806328	0.675262	10	1	18	0	11	18	29
1	26	7	2	Violet	0.481573	0.499124	0.658719	0.599614	0.253145	0.446994	0.653428	0.352105	10	0	24	2	10	26	36
1	27	7	3	VestSP23	0.745	0.582697	0.793199	0.805618	0.587674	0.719671	0.808723	0.672478	8	1	18	0	9	18	27
1	28	7	4	TypBlue	0.797159	0.747824	0.839663	0.84247	0.670776	0.775862	0.847796	0.737229	2	1	3	2	3	5	8
1	29	8	1	VestSP23	0.745	0.582697	0.793199	0.805618	0.587674	0.719671	0.808723	0.672478	3	2	8	1	5	9	14
1	30	8	2	TypBlue	0.797159	0.747824	0.839663	0.84247	0.670776	0.775862	0.847796	0.737229	2	0	8	1	2	9	11
1	31	8	3	VestZF	0.746536	0.537157	0.785253	0.807961	0.588951	0.721059	0.806328	0.675262	14	2	12	1	16	13	29
1	32	8	4	Violet	0.481573	0.499124	0.658719	0.599614	0.253145	0.446994	0.653428	0.352105	1	0	10	1	1	11	12
1	33	9	1	VestSP23	0.745	0.582697	0.793199	0.805618	0.587674	0.719671	0.808723	0.672478	7	9	20	0	16	20	36
1	34	9	2	TypBlue	0.797159	0.747824	0.839663	0.84247	0.670776	0.775862	0.847796	0.737229	11	12	8	0	23	8	31
1	35	9	3	VestZF	0.746536	0.537157	0.785253	0.807961	0.588951	0.721059	0.806328	0.675262	9	11	21	0	20	21	41
1	36	9	4	Violet	0.481573	0.499124	0.658719	0.599614	0.253145	0.446994	0.653428	0.352105	1	1	13	0	2	13	15
1	37	10	1	Violet	0.481573	0.499124	0.658719	0.599614	0.253145	0.446994	0.653428	0.352105	6	1	11	0	7	11	18
1	38	10	2	VestSP23	0.745	0.582697	0.793199	0.805618	0.587674	0.719671	0.808723	0.672478	13	0	20	0	13	20	33
1	39	10	3	TypBlue	0.797159	0.747824	0.839663	0.84247	0.670776	0.775862	0.847796	0.737229	5	0	11	3	5	14	19
1	40	10	4	VestZF	0.746536	0.537157	0.785253	0.807961	0.588951	0.721059	0.806328	0.675262	2	1	9	0	3	9	12
1	41	11	1	VestZF	0.746536	0.537157	0.785253	0.807961	0.588951	0.721059	0.806328	0.675262	6	2	16	1	8	17	25
1	42	11	2	Violet	0.481573	0.499124	0.658719	0.599614	0.253145	0.446994	0.653428	0.352105	4	3	12	1	7	13	20
1	43	11	3	VestSP23	0.745	0.582697	0.793199	0.805618	0.587674	0.719671	0.808723	0.672478	18	4	15	1	22	16	38
1	44	11	4	TypBlue	0.797159	0.747824	0.839663	0.84247	0.670776	0.775862	0.847796	0.737229	3	0	5	1	3	6	9
1	45	12	1	TypBlue	0.797159	0.747824	0.839663	0.84247	0.670776	0.775862	0.847796	0.737229	5	1	13	0	6	13	19
1	46	12	2	VestZF	0.746536	0.537157	0.785253	0.807961	0.588951	0.721059	0.806328	0.675262	5	0	10	0	5	10	15
1	47	12	3	Violet	0.481573	0.499124	0.658719	0.599614	0.253145	0.446994	0.653428	0.352105	6	2	7	0	8	7	15
1	48	12	4	VestSP23	0.745	0.582697	0.793199	0.805618	0.587674	0.719671	0.808723	0.672478	2	0	13	0	2	13	15
1	49	13	1	VestZF	0.746536	0.537157	0.785253	0.807961	0.588951	0.721059	0.806328	0.675262	10	8	20	3	18	23	41
1	50	13	2	VestSP23	0.745	0.582697	0.793199	0.805618	0.587674	0.719671	0.808723	0.672478	7	0	8	0	7	8	15
1	51	13	3	TypBlue	0.797159	0.747824	0.839663	0.84247	0.670776	0.775862	0.847796	0.737229	7	2	9	1	9	10	19
1	52	13	4	Violet	0.481573	0.499124	0.658719	0.599614	0.253145	0.446994	0.653428	0.352105	4	1	11	0	5	11	16
1	53	14	1	VestSP23	0.745	0.582697	0.793199	0.805618	0.587674	0.719671	0.808723	0.672478	14	1	23	8	15	31	46
1	54	14	2	VestZF	0.746536	0.537157	0.785253	0.807961	0.588951	0.721059	0.806328	0.675262	11	0	20	0	11	20	31
1	55	14	3	Violet	0.481573	0.499124	0.658719	0.599614	0.253145	0.446994	0.653428	0.352105	14	3	26	1	17	27	44
1	56	14	4	TypBlue	0.797159	0.747824	0.839663	0.84247	0.670776	0.775862	0.847796	0.737229	2	0	2	0	2	2	4
1	57	15	1	TypBlue	0.797159	0.747824	0.839663	0.84247	0.670776	0.775862	0.847796	0.737229	10	1	19	0	11	19	30
1	58	15	2	Violet	0.481573	0.499124	0.658719	0.599614	0.253145	0.446994	0.653428	0.352105	7	1	28	1	8	29	37
1	59	15	3	VestSP23	0.745	0.582697	0.793199	0.805618	0.587674	0.719671	0.808723	0.672478	10	5	9	0	15	9	24
1	60	15	4	VestZF	0.746536	0.537157	0.785253	0.807961	0.588951	0.721059	0.806328	0.675262	5	0	7	0	5	7	12
1	61	16	1	Violet	0.481573	0.499124	0.658719	0.599614	0.253145	0.446994	0.653428	0.352105	14	0	17	4	14	21	35
1	62	16	2	TypBlue	0.797159	0.747824	0.839663	0.84247	0.670776	0.775862	0.847796	0.737229	3	0	9	0	3	9	12
1	63	16	3	VestZF	0.746536	0.537157	0.785253	0.807961	0.588951	0.721059	0.806328	0.675262	17	0	22	1	17	23	40
1	64	16	4	VestSP23	0.745	0.582697	0.793199	0.805618	0.587674	0.719671	0.808723	0.672478	5	0	6	0	5	6	11
2	65	17	5	Violet4.5%	0.550481	0.562294	0.714113	0.662494	0.303751	0.514509	0.709985	0.416337	7	0	15	3	7	18	25
2	66	17	6	Violet7%	0.509761	0.522555	0.681141	0.625871	0.271834	0.474191	0.676668	0.377511	9	1	16	2	10	18	28
2	67	17	7	VestZF	0.746536	0.537157	0.785253	0.807961	0.588951	0.721059	0.806328	0.675262	27	6	23	0	33	23	56
2	68	17	8	Violet9%	0.494042	0.51552	0.667731	0.609905	0.262446	0.458836	0.662417	0.363853	3	0	13	3	3	16	19
2	69	18	5	Violet7%	0.509761	0.522555	0.681141	0.625871	0.271834	0.474191	0.676668	0.377511	9	5	12	2	14	14	28
2	70	18	6	Violet9%	0.494042	0.51552	0.667731	0.609905	0.262446	0.458836	0.662417	0.363853	8	3	16	1	11	17	28
2	71	18	7	Violet4.5%	0.550481	0.562294	0.714113	0.662494	0.303751	0.514509	0.709985	0.416337	16	7	17	1	23	18	41
2	72	18	8	VestZF	0.746536	0.537157	0.785253	0.807961	0.588951	0.721059	0.806328	0.675262	5	0	10	0	5	10	15
2	73	19	5	Violet9%	0.494042	0.51552	0.667731	0.609905	0.262446	0.458836	0.662417	0.363853	6	2	7	2	8	9	17
2	74	19	6	VestZF	0.746536	0.537157	0.785253	0.807961	0.588951	0.721059	0.806328	0.675262	7	0	18	0	7	18	25
2	75	19	7	Violet7%	0.509761	0.522555	0.681141	0.625871	0.271834	0.474191	0.676668	0.377511	18	4	20	0	22	20	42
2	76	19	8	Violet4.5%	0.550481	0.562294	0.714113	0.662494	0.303751	0.514509	0.709985	0.416337	2	0	6	0	2	6	8
2	77	20	5	VestZF	0.746536	0.537157	0.785253	0.807961	0.588951	0.721059	0.806328	0.675262	9	3	6	0	12	6	18
2	78	20	6	Violet4.5%	0.550481	0.562294	0.714113	0.662494	0.303751	0.514509	0.709985	0.416337	10	1	9	2	11	11	22
2	79	20	7	Violet9%	0.494042	0.51552	0.667731	0.609905	0.262446	0.458836	0.662417	0.363853	20	6	15	0	26	15	41
2	80	20	8	Violet7%	0.509761	0.522555	0.681141	0.625871	0.271834	0.474191	0.676668	0.377511	5	0	14	1	5	15	20
2	81	21	5	Violet4.5%	0.550481	0.562294	0.714113	0.662494	0.303751	0.514509	0.709985	0.416337	5	0	13	0	5	13	18
2	82	21	6	Violet7%	0.509761	0.522555	0.681141	0.625871	0.271834	0.474191	0.676668	0.377511	4	1	14	4	5	18	23
2	83	21	7	Violet9%	0.494042	0.51552	0.667731	0.609905	0.262446	0.458836	0.662417	0.363853	16	4	10	2	20	12	32
2	84	21	8	VestZF	0.746536	0.537157	0.785253	0.807961	0.588951	0.721059	0.806328	0.675262	0	0	7	0	0	7	7
2	85	22	5	Violet9%	0.494042	0.51552	0.667731	0.609905	0.262446	0.458836	0.662417	0.363853	5	2	11	3	7	14	21
2	86	22	6	VestZF	0.746536	0.537157	0.785253	0.807961	0.588951	0.721059	0.806328	0.675262	1	1	5	0	2	5	7
2	87	22	7	Violet4.5%	0.550481	0.562294	0.714113	0.662494	0.303751	0.514509	0.709985	0.416337	14	3	15	2	17	17	34
2	88	22	8	Violet7%	0.509761	0.522555	0.681141	0.625871	0.271834	0.474191	0.676668	0.377511	4	0	5	2	4	7	11
2	89	23	5	VestZF	0.746536	0.537157	0.785253	0.807961	0.588951	0.721059	0.806328	0.675262	14	1	29	2	15	31	46
2	90	23	6	Violet4.5%	0.550481	0.562294	0.714113	0.662494	0.303751	0.514509	0.709985	0.416337	8	0	12	2	8	14	22
2	91	23	7	Violet7%	0.509761	0.522555	0.681141	0.625871	0.271834	0.474191	0.676668	0.377511	11	4	10	1	15	11	26
2	92	23	8	Violet9%	0.494042	0.51552	0.667731	0.609905	0.262446	0.458836	0.662417	0.363853	0	2	4	0	2	4	6
2	93	24	5	Violet7%	0.509761	0.522555	0.681141	0.625871	0.271834	0.474191	0.676668	0.377511	0	0	9	1	0	10	10
2	94	24	6	Violet9%	0.494042	0.51552	0.667731	0.609905	0.262446	0.458836	0.662417	0.363853	4	0	7	0	4	7	11
2	95	24	7	VestZF	0.746536	0.537157	0.785253	0.807961	0.588951	0.721059	0.806328	0.675262	13	0	9	0	13	9	22
2	96	24	8	Violet4.5%	0.550481	0.562294	0.714113	0.662494	0.303751	0.514509	0.709985	0.416337	5	1	3	0	6	3	9
2	97	25	9	Violet7%	0.509761	0.522555	0.681141	0.625871	0.271834	0.474191	0.676668	0.377511	17	2	14	1	19	15	34
2	98	25	10	VestZF	0.746536	0.537157	0.785253	0.807961	0.588951	0.721059	0.806328	0.675262	3	3	2	0	6	2	8
2	99	25	11	Violet4.5%	0.550481	0.562294	0.714113	0.662494	0.303751	0.514509	0.709985	0.416337	13	7	11	3	20	14	34
2	100	25	12	Violet9%	0.494042	0.51552	0.667731	0.609905	0.262446	0.458836	0.662417	0.363853	18	5	14	1	23	15	38
2	101	26	9	VestZF	0.746536	0.537157	0.785253	0.807961	0.588951	0.721059	0.806328	0.675262	17	3	17	1	20	18	38
2	102	26	10	Violet7%	0.509761	0.522555	0.681141	0.625871	0.271834	0.474191	0.676668	0.377511	9	5	66	1	14	67	81
2	103	26	11	Violet9%	0.494042	0.51552	0.667731	0.609905	0.262446	0.458836	0.662417	0.363853	10	0	11	12	10	23	33
2	104	26	12	Violet4.5%	0.550481	0.562294	0.714113	0.662494	0.303751	0.514509	0.709985	0.416337	17	17	12	2	34	14	48
2	105	27	9	Violet9%	0.494042	0.51552	0.667731	0.609905	0.262446	0.458836	0.662417	0.363853	13	1	16	1	14	17	31
2	106	27	10	Violet4.5%	0.550481	0.562294	0.714113	0.662494	0.303751	0.514509	0.709985	0.416337	5	5	5	1	10	6	16
2	107	27	11	Violet7%	0.509761	0.522555	0.681141	0.625871	0.271834	0.474191	0.676668	0.377511	7	0	7	1	7	8	15
2	108	27	12	VestZF	0.746536	0.537157	0.785253	0.807961	0.588951	0.721059	0.806328	0.675262	10	0	14	2	10	16	26
2	109	28	9	Violet4.5%	0.550481	0.562294	0.714113	0.662494	0.303751	0.514509	0.709985	0.416337	3	4	3	0	7	3	10
2	110	28	10	Violet9%	0.494042	0.51552	0.667731	0.609905	0.262446	0.458836	0.662417	0.363853	4	2	14	0	6	14	20
2	111	28	11	VestZF	0.746536	0.537157	0.785253	0.807961	0.588951	0.721059	0.806328	0.675262	3	0	9	1	3	10	13
2	112	28	12	Violet7%	0.509761	0.522555	0.681141	0.625871	0.271834	0.474191	0.676668	0.377511	4	3	8	1	7	9	16
2	113	29	9	VestZF	0.746536	0.537157	0.785253	0.807961	0.588951	0.721059	0.806328	0.675262	6	0	9	4	6	13	19
2	114	29	10	Violet4.5%	0.550481	0.562294	0.714113	0.662494	0.303751	0.514509	0.709985	0.416337	8	4	8	0	12	8	20
2	115	29	11	Violet9%	0.494042	0.51552	0.667731	0.609905	0.262446	0.458836	0.662417	0.363853	11	2	8	4	13	12	25
2	116	29	12	Violet7%	0.509761	0.522555	0.681141	0.625871	0.271834	0.474191	0.676668	0.377511	19	2	19	4	21	23	44
2	117	30	9	Violet4.5%	0.550481	0.562294	0.714113	0.662494	0.303751	0.514509	0.709985	0.416337	6	0	9	2	6	11	17
2	118	30	10	Violet7%	0.509761	0.522555	0.681141	0.625871	0.271834	0.474191	0.676668	0.377511	4	4	8	1	8	9	17
2	119	30	11	VestZF	0.746536	0.537157	0.785253	0.807961	0.588951	0.721059	0.806328	0.675262	2	0	9	0	2	9	11
2	120	30	12	Violet9%	0.494042	0.51552	0.667731	0.609905	0.262446	0.458836	0.662417	0.363853	15	4	12	2	19	14	33
2	121	31	9	Violet9%	0.494042	0.51552	0.667731	0.609905	0.262446	0.458836	0.662417	0.363853	5	0	15	3	5	18	23
2	122	31	10	VestZF	0.746536	0.537157	0.785253	0.807961	0.588951	0.721059	0.806328	0.675262	3	0	4	2	3	6	9
2	123	31	11	Violet7%	0.509761	0.522555	0.681141	0.625871	0.271834	0.474191	0.676668	0.377511	3	4	7	3	7	10	17
2	124	31	12	Violet4.5%	0.550481	0.562294	0.714113	0.662494	0.303751	0.514509	0.709985	0.416337	7	4	9	0	11	9	20
2	125	32	9	Violet7%	0.509761	0.522555	0.681141	0.625871	0.271834	0.474191	0.676668	0.377511	8	1	4	1	9	5	14
2	126	32	10	Violet9%	0.494042	0.51552	0.667731	0.609905	0.262446	0.458836	0.662417	0.363853	4	3	3	1	7	4	11
2	127	32	11	Violet4.5%	0.550481	0.562294	0.714113	0.662494	0.303751	0.514509	0.709985	0.416337	6	6	3	0	12	3	15
2	128	32	12	VestZF	0.746536	0.537157	0.785253	0.807961	0.588951	0.721059	0.806328	0.675262	9	4	2	0	13	2	15

## Sheet: UgandaExcitations
rep	day	site	fabric	MR1	MR7p	MR7y	MR8p	MR8y	TR1	TR7y	TR8y	males	females	total
1	1	1	TypBlue	0.797159	0.747824	0.839663	0.84247	0.670776	0.775862	0.847796	0.737229	1	6	7
2	1	2	VestZF	0.746536	0.537157	0.785253	0.807961	0.588951	0.721059	0.806328	0.675262	0	1	1
3	1	3	Violet	0.481573	0.499124	0.658719	0.599614	0.253145	0.446994	0.653428	0.352105	0	0	0
4	2	1	Violet	0.481573	0.499124	0.658719	0.599614	0.253145	0.446994	0.653428	0.352105	0	0	0
5	2	3	VestZF	0.746536	0.537157	0.785253	0.807961	0.588951	0.721059	0.806328	0.675262	0	0	0
6	3	1	VestZF	0.746536	0.537157	0.785253	0.807961	0.588951	0.721059	0.806328	0.675262	1	1	2
7	3	2	Violet	0.481573	0.499124	0.658719	0.599614	0.253145	0.446994	0.653428	0.352105	1	1	2
8	3	3	TypBlue	0.797159	0.747824	0.839663	0.84247	0.670776	0.775862	0.847796	0.737229	0	0	0
9	4	1	TypBlue	0.797159	0.747824	0.839663	0.84247	0.670776	0.775862	0.847796	0.737229	0	2	2
10	4	2	Violet	0.481573	0.499124	0.658719	0.599614	0.253145	0.446994	0.653428	0.352105	0	0	0
11	4	3	VestZF	0.746536	0.537157	0.785253	0.807961	0.588951	0.721059	0.806328	0.675262	1	3	4
12	5	1	Violet	0.481573	0.499124	0.658719	0.599614	0.253145	0.446994	0.653428	0.352105	0	5	5
13	5	2	VestZF	0.746536	0.537157	0.785253	0.807961	0.588951	0.721059	0.806328	0.675262	0	1	1
14	5	3	TypBlue	0.797159	0.747824	0.839663	0.84247	0.670776	0.775862	0.847796	0.737229	0	0	0
15	6	1	VestZF	0.746536	0.537157	0.785253	0.807961	0.588951	0.721059	0.806328	0.675262	1	0	1
16	6	2	TypBlue	0.797159	0.747824	0.839663	0.84247	0.670776	0.775862	0.847796	0.737229	0	0	0
17	6	3	Violet	0.481573	0.499124	0.658719	0.599614	0.253145	0.446994	0.653428	0.352105	1	0	1
18	7	1	VestZF	0.746536	0.537157	0.785253	0.807961	0.588951	0.721059	0.806328	0.675262	2	5	7
19	7	2	Violet	0.481573	0.499124	0.658719	0.599614	0.253145	0.446994	0.653428	0.352105	0	2	2
20	7	3	TypBlue	0.797159	0.747824	0.839663	0.84247	0.670776	0.775862	0.847796	0.737229	2	2	4
21	8	1	Violet	0.481573	0.499124	0.658719	0.599614	0.253145	0.446994	0.653428	0.352105	2	1	3
22	8	2	TypBlue	0.797159	0.747824	0.839663	0.84247	0.670776	0.775862	0.847796	0.737229	0	0	0
23	8	3	VestZF	0.746536	0.537157	0.785253	0.807961	0.588951	0.721059	0.806328	0.675262	0	2	2
24	9	1	TypBlue	0.797159	0.747824	0.839663	0.84247	0.670776	0.775862	0.847796	0.737229	1	1	2
25	9	2	VestZF	0.746536	0.537157	0.785253	0.807961	0.588951	0.721059	0.806328	0.675262	0	1	1
26	9	3	Violet	0.481573	0.499124	0.658719	0.599614	0.253145	0.446994	0.653428	0.352105	2	1	3
27	10	1	VestZF	0.746536	0.537157	0.785253	0.807961	0.588951	0.721059	0.806328	0.675262	0	2	2
28	10	2	Violet	0.481573	0.499124	0.658719	0.599614	0.253145	0.446994	0.653428	0.352105	0	0	0
29	10	3	TypBlue	0.797159	0.747824	0.839663	0.84247	0.670776	0.775862	0.847796	0.737229	0	1	1
30	11	1	TypBlue	0.797159	0.747824	0.839663	0.84247	0.670776	0.775862	0.847796	0.737229	0	4	4
31	11	2	VestZF	0.746536	0.537157	0.785253	0.807961	0.588951	0.721059	0.806328	0.675262	0	0	0
32	11	3	Violet	0.481573	0.499124	0.658719	0.599614	0.253145	0.446994	0.653428	0.352105	1	1	2
33	12	1	Violet	0.481573	0.499124	0.658719	0.599614	0.253145	0.446994	0.653428	0.352105	0	0	0
34	12	2	TypBlue	0.797159	0.747824	0.839663	0.84247	0.670776	0.775862	0.847796	0.737229	0	0	0
35	12	3	VestZF	0.746536	0.537157	0.785253	0.807961	0.588951	0.721059	0.806328	0.675262	0	0	0
36	13	1	VestZF	0.746536	0.537157	0.785253	0.807961	0.588951	0.721059	0.806328	0.675262	3	4	7
37	13	2	TypBlue	0.797159	0.747824	0.839663	0.84247	0.670776	0.775862	0.847796	0.737229	0	0	0
38	13	3	Violet	0.481573	0.499124	0.658719	0.599614	0.253145	0.446994	0.653428	0.352105	0	3	3
39	14	1	Violet	0.481573	0.499124	0.658719	0.599614	0.253145	0.446994	0.653428	0.352105	4	3	7
40	14	2	VestZF	0.746536	0.537157	0.785253	0.807961	0.588951	0.721059	0.806328	0.675262	0	1	1
41	14	3	TypBlue	0.797159	0.747824	0.839663	0.84247	0.670776	0.775862	0.847796	0.737229	0	0	0
42	15	1	TypBlue	0.797159	0.747824	0.839663	0.84247	0.670776	0.775862	0.847796	0.737229	0	0	0
43	15	2	Violet	0.481573	0.499124	0.658719	0.599614	0.253145	0.446994	0.653428	0.352105	1	2	3
44	15	3	VestZF	0.746536	0.537157	0.785253	0.807961	0.588951	0.721059	0.806328	0.675262	0	1	1
45	16	1	Violet	0.481573	0.499124	0.658719	0.599614	0.253145	0.446994	0.653428	0.352105	0	1	1
46	16	2	TypBlue	0.797159	0.747824	0.839663	0.84247	0.670776	0.775862	0.847796	0.737229	1	1	2
47	16	3	VestZF	0.746536	0.537157	0.785253	0.807961	0.588951	0.721059	0.806328	0.675262	0	1	1
48	17	1	TypBlue	0.797159	0.747824	0.839663	0.84247	0.670776	0.775862	0.847796	0.737229	0	0	0
49	17	2	VestZF	0.746536	0.537157	0.785253	0.807961	0.588951	0.721059	0.806328	0.675262	0	0	0
50	17	3	Violet	0.481573	0.499124	0.658719	0.599614	0.253145	0.446994	0.653428	0.352105	0	0	0
